# Supplementary material for: Distinct features of a peripheral T-helper subset that drives B cell response in dengue virus infection
Source: Research Square preprint supplement (doi:10.21203/rs.3.rs-3886693/v1), 2024-02-01
Supplement: Supplementary file 1 [file 0bd2880333a59a2b3fd445cb.xlsx]

## Sheet: INDEX
Supplementary Table 2: Differential gene expression analysis and GSEA geneList.
A - Significantly enriched genes in each Seurat cluster.
B - Significantly up- and down-regulated genes in cluster 5 versus cluster 2.
C - Significantly up- and down-regulated genes in IL21+ versus GZMB+ cells.
D - GeneList used for GSEA analysis.

## Sheet: Table_S2A
Supplementary Table 2A. Significantly enriched genes in each Seurat cluster.
Genes	Cluster No.	Fraction expressed in cluster	Fraction expressed in rest of clusters	Average log2 Fold Change	p-value	Adjusted p-value
FP671120.4	9	0.982	0.9	3.2677	5.21326e-29	1.03259e-24
FP236383.3	9	1	0.999	2.5357	1.72135e-26	3.40949e-22
CBLB	9	0.927	0.898	1.72083	8.61175e-23	1.70573e-18
EML4	9	0.982	0.945	1.31601	1.60393e-20	3.17691e-16
FYN	9	0.982	0.943	1.54554	2.24676e-20	4.45015e-16
UTRN	9	0.909	0.825	1.564	1.0126e-19	2.00565e-15
CYTH1	9	0.909	0.878	1.69318	2.2608e-19	4.47797e-15
INPP5D	9	0.855	0.718	1.69183	5.03866e-19	9.98008e-15
MALAT1	9	1	0.999	1.33191	5.43566e-18	1.07664e-13
FOXN3	9	0.909	0.85	1.30584	5.88528e-18	1.1657e-13
ATXN1	9	0.909	0.855	1.65127	7.51265e-18	1.48803e-13
CNOT6L	9	0.873	0.773	1.5966	7.65161e-18	1.51555e-13
NEAT1	9	0.909	0.878	1.37596	4.13477e-16	8.18974e-12
CCL5	9	0.836	0.541	2.03119	1.61807e-15	3.2049e-11
ARHGAP15	9	0.964	0.945	1.24634	1.68267e-15	3.33287e-11
RIPOR2	9	0.891	0.848	1.18769	2.44207e-15	4.83701e-11
BCL11B	9	0.873	0.866	1.38525	2.6834e-15	5.31501e-11
MT-CO1	9	1	0.999	0.664645	3.09488e-15	6.13003e-11
P2RY8	9	0.855	0.823	1.43971	9.74028e-15	1.92926e-10
RNF213	9	0.964	0.97	1.13192	2.48952e-14	4.931e-10
SKAP1	9	0.909	0.924	1.20144	2.8415e-13	5.62815e-09
PARP8	9	0.782	0.689	1.73179	3.94802e-13	7.81983e-09
SMCHD1	9	0.909	0.969	1.1795	4.30749e-13	8.53184e-09
MAP3K5	9	0.836	0.811	1.21265	1.02917e-12	2.03848e-08
ANKRD11	9	0.836	0.86	1.45382	1.35467e-12	2.6832e-08
ANKRD44	9	0.818	0.807	1.32141	2.30562e-12	4.56674e-08
SYTL2	9	0.6	0.312	1.57938	2.64453e-12	5.23801e-08
PRKCH	9	0.818	0.891	1.29296	4.75652e-12	9.42124e-08
RASA3	9	0.836	0.871	1.3416	1.4281e-11	2.82864e-07
MACF1	9	0.782	0.74	1.33571	1.66487e-11	3.29762e-07
AHNAK	9	0.836	0.805	1.17369	2.29192e-11	4.5396e-07
CDC42SE2	9	0.891	0.921	1.07008	2.83966e-11	5.62451e-07
DOCK10	9	0.8	0.804	1.24379	3.43875e-11	6.81113e-07
MT-ND4L	9	0.982	0.993	0.671671	4.34838e-11	8.61283e-07
SIK3	9	0.8	0.836	1.34994	6.98935e-11	1.38438e-06
TC2N	9	0.709	0.587	1.69222	1.73666e-10	3.43981e-06
PRKCB	9	0.782	0.777	1.12661	1.7444e-10	3.45514e-06
PRKX	9	0.727	0.603	1.49138	1.95475e-10	3.87177e-06
OGA	9	0.782	0.791	1.14817	2.55243e-10	5.0556e-06
AKAP9	9	0.764	0.711	1.13076	3.76959e-10	7.46643e-06
LRBA	9	0.782	0.803	1.35249	3.854e-10	7.63361e-06
RASA2	9	0.836	0.86	1.02093	5.36116e-10	1.06189e-05
TGFBR3	9	0.691	0.526	1.4929	1.00466e-09	1.98992e-05
ANK3	9	0.527	0.273	1.72351	1.26234e-09	2.50031e-05
PTPRC	9	0.964	0.994	0.671292	1.93114e-09	3.82502e-05
PAM	9	0.673	0.537	1.32505	2.94201e-09	5.82725e-05
SYNE2	9	0.855	0.933	1.02074	3.21951e-09	6.37688e-05
PACS1	9	0.782	0.745	0.970918	4.20702e-09	8.33285e-05
SRPK2	9	0.8	0.846	0.97625	5.69267e-09	0.000112755
PRKCQ	9	0.745	0.749	1.23206	6.28178e-09	0.000124423
ANKRD12	9	0.873	0.904	0.655825	6.56369e-09	0.000130007
ITGAL	9	0.691	0.617	1.2248	1.04506e-08	0.000206994
PPP1R16B	9	0.727	0.741	1.36814	4.2583e-08	0.000843442
SMAD3	9	0.636	0.546	1.19151	4.7136e-08	0.000933622
SIPA1L1	9	0.691	0.621	1.35769	4.73728e-08	0.000938313
SH3KBP1	9	0.8	0.897	0.854965	5.46467e-08	0.00108239
EPB41	9	0.782	0.866	1.0441	5.95145e-08	0.0011788
HECA	9	0.691	0.693	1.17736	9.23889e-08	0.00182995
PTPRJ	9	0.709	0.751	1.48689	9.86059e-08	0.00195309
BTBD11	9	0.6	0.443	1.36923	1.18216e-07	0.00234151
TRBC2	9	0.8	0.885	1.21755	1.19119e-07	0.00235939
CHST11	9	0.727	0.761	1.09065	1.67167e-07	0.00331107
KMT2E	9	0.818	0.898	0.866122	1.85951e-07	0.00368312
IQGAP2	9	0.855	0.893	0.968842	2.36498e-07	0.00468431
PIP4K2A	9	0.691	0.697	1.11616	2.72306e-07	0.00539356
NSD3	9	0.818	0.909	0.720814	2.75746e-07	0.00546169
PREX1	9	0.709	0.823	1.07067	2.82608e-07	0.00559761
CHD2	9	0.727	0.79	0.939478	2.83222e-07	0.00560977
MT-ND5	9	0.982	0.984	0.559466	3.19551e-07	0.00632935
NLRP1	9	0.655	0.614	1.10691	3.24367e-07	0.00642474
MGAT5	9	0.6	0.499	1.45664	4.15367e-07	0.00822717
IKZF3	9	0.709	0.651	0.965638	4.85247e-07	0.00961129
STK10	9	0.727	0.779	1.05396	4.93729e-07	0.00977928
NFATC3	9	0.673	0.657	0.9989	5.42029e-07	0.010736
EXOC4	9	0.636	0.601	1.27818	7.64128e-07	0.0151351
FNBP1	9	0.8	0.911	0.828324	8.57967e-07	0.0169938
PCSK7	9	0.618	0.532	1.20377	9.62066e-07	0.0190556
STAT4	9	0.655	0.626	1.22275	9.74967e-07	0.0193112
RORA	9	0.836	0.9	0.914992	1.00936e-06	0.0199924
ARID5B	9	0.855	0.937	0.853564	1.25011e-06	0.024761
NKTR	9	0.673	0.708	0.967542	1.35767e-06	0.0268913
CD4	9	0.709	0.772	1.06564	1.47386e-06	0.0291928
XIST	9	0.491	0.325	1.34452	1.5706e-06	0.0311089
HIVEP2	9	0.673	0.671	1.11906	1.75686e-06	0.034798
RPL34	8	1	1	1.27516	1.67215e-43	3.31203e-39
SELENOM	8	0.347	0.035	0.783188	7.56344e-43	1.49809e-38
RPS12	8	1	1	1.24155	8.80113e-42	1.74324e-37
RPS27	8	1	1	1.25715	2.41773e-41	4.7888e-37
FHIT	8	0.792	0.246	1.94306	4.61666e-40	9.14422e-36
RPL30	8	1	0.999	1.19559	7.08105e-40	1.40254e-35
RPL13	8	1	1	1.00155	6.61384e-38	1.31e-33
RPL39	8	1	0.998	1.00592	2.62911e-37	5.20748e-33
RPL10	8	1	0.999	1.10241	3.11502e-37	6.16992e-33
RPS25	8	1	0.997	1.11306	1.29972e-36	2.57435e-32
RPS29	8	1	0.998	0.935977	2.31222e-35	4.57982e-31
RPL11	8	1	1	0.873723	1.85871e-34	3.68155e-30
EEF1A1	8	1	0.999	1.03232	1.0258e-33	2.03181e-29
FAU	8	1	0.999	0.867735	1.80641e-33	3.57795e-29
RPS27A	8	1	1	0.899367	8.09553e-33	1.60348e-28
RPL9	8	1	0.988	1.05665	2.50187e-32	4.95545e-28
RPS23	8	1	0.999	0.915686	6.3221e-32	1.25222e-27
RPL32	8	1	1	1.03607	1.25097e-31	2.47779e-27
RPL35A	8	1	0.999	0.895717	9.42257e-30	1.86633e-25
RPL18A	8	1	0.999	0.887307	1.59774e-28	3.16465e-24
JUNB	8	0.972	0.943	1.92736	2.94516e-28	5.83347e-24
RPS18	8	1	1	0.834367	5.97793e-28	1.18405e-23
RPL36	8	1	1	0.789638	1.20302e-27	2.38283e-23
RPS21	8	1	0.999	0.730126	2.02029e-27	4.00159e-23
RPLP1	8	1	1	0.724609	2.18516e-27	4.32815e-23
RPS13	8	1	0.998	0.832312	7.23792e-27	1.43361e-22
RPL37	8	1	1	0.740868	8.44857e-27	1.67341e-22
RPL19	8	1	0.999	0.747533	1.34271e-26	2.65951e-22
RPL36A	8	0.972	0.985	0.988052	1.4458e-26	2.86369e-22
RPS28	8	1	1	0.739465	1.54393e-26	3.05807e-22
ZFP36L2	8	0.986	0.915	1.92001	2.31484e-26	4.58501e-22
TXNIP	8	0.958	0.762	1.84042	2.50944e-26	4.97045e-22
RPS14	8	1	0.999	0.839398	7.80287e-26	1.54551e-21
RPS15A	8	1	0.999	0.659623	1.88071e-25	3.72513e-21
RPS8	8	1	1	0.800866	2.65298e-25	5.25475e-21
RPL26	8	1	0.999	0.750718	4.45565e-25	8.8253e-21
PABPC1	8	1	0.989	0.939159	1.01023e-24	2.00096e-20
TPT1	8	1	1	0.827106	1.38763e-24	2.74848e-20
SARAF	8	1	0.992	1.08221	1.75983e-24	3.4857e-20
MALAT1	8	1	0.999	1.25526	3.0333e-24	6.00806e-20
RPS6	8	1	0.997	0.813365	6.59283e-24	1.30584e-19
RPL14	8	1	0.999	0.721951	6.70462e-24	1.32799e-19
RPS3A	8	1	0.999	0.79612	7.43367e-24	1.47239e-19
MAL	8	0.653	0.194	0.939035	1.64602e-23	3.26026e-19
APOO	8	0.958	0.913	1.07466	1.75004e-23	3.46631e-19
RPL23	8	1	0.966	1.05057	2.30586e-23	4.56721e-19
RPL13A	8	0.986	0.994	0.884204	2.71835e-23	5.38423e-19
RPL28	8	1	1	0.565681	7.79245e-23	1.54345e-18
SLC2A3	8	0.972	0.773	1.34108	1.34625e-22	2.66652e-18
RPL5	8	0.972	0.99	0.830191	1.54448e-22	3.05915e-18
SESN3	8	0.722	0.29	1.26711	3.66968e-22	7.26854e-18
LTB	8	0.944	0.702	1.37276	7.27753e-22	1.44146e-17
PNRC1	8	0.986	0.93	1.19607	9.95934e-22	1.97265e-17
CSGALNACT1	8	0.514	0.156	1.15152	3.33114e-21	6.59799e-17
BTG1	8	0.986	0.99	1.15211	3.61604e-21	7.16229e-17
SNED1	8	0.5	0.142	1.32842	6.95113e-21	1.37681e-16
RPL10A	8	1	0.985	0.826147	2.00501e-20	3.97133e-16
RPL6	8	1	0.998	0.590156	1.06256e-19	2.10461e-15
ZNF331	8	0.847	0.511	1.18969	2.24182e-19	4.44037e-15
RPL3	8	1	0.991	0.776795	5.15103e-19	1.02027e-14
IFNGR2	8	0.25	0.04	0.527082	5.25573e-19	1.041e-14
IL7R	8	0.847	0.562	1.47978	6.26199e-19	1.24031e-14
RPL17	8	0.986	0.995	0.674382	1.51022e-18	2.9913e-14
JUND	8	0.986	0.986	0.995984	1.73435e-18	3.43523e-14
RPL37A	8	1	0.997	0.58332	2.59584e-18	5.14159e-14
RPS16	8	1	0.997	0.606541	3.98289e-18	7.88891e-14
RPL21	8	0.972	0.985	0.765246	1.01472e-17	2.00986e-13
RPL12	8	1	1	0.551057	1.09478e-17	2.16843e-13
RPL38	8	1	0.987	0.695975	1.32076e-17	2.61604e-13
RPL22	8	1	0.992	0.656419	4.84627e-17	9.59902e-13
RPL23A	8	1	0.996	0.630076	9.99435e-17	1.97958e-12
RPS15	8	1	1	0.408157	5.16749e-16	1.02352e-11
FXYD5	8	0.972	0.989	0.666243	6.06245e-16	1.20079e-11
GRASP	8	0.333	0.081	0.982394	6.696e-16	1.32628e-11
RPL29	8	1	1	0.515693	9.21807e-16	1.82582e-11
RPL27A	8	0.972	0.97	0.799522	1.02496e-15	2.03014e-11
RPL18	8	1	0.999	0.599669	1.51771e-15	3.00613e-11
ALOX5AP	8	0.778	0.394	0.992705	1.55837e-15	3.08666e-11
RPL24	8	0.986	0.998	0.565806	2.30149e-15	4.55856e-11
TOMM7	8	0.986	0.979	0.61219	2.9325e-15	5.80841e-11
TSC22D3	8	0.944	0.92	1.00672	3.1197e-15	6.17919e-11
NOP53	8	0.875	0.846	0.926566	4.72969e-15	9.36809e-11
EEF1B2	8	1	0.961	0.761857	5.04865e-15	9.99986e-11
RPS2	8	1	0.996	0.695104	7.40137e-15	1.46599e-10
RPLP2	8	1	0.998	0.505224	9.00264e-15	1.78315e-10
DDX24	8	0.944	0.902	0.874469	1.17757e-14	2.33241e-10
SVIL	8	0.25	0.052	0.475377	1.63995e-14	3.24825e-10
RPS19	8	1	1	0.522091	1.72479e-14	3.4163e-10
FTH1	8	1	0.998	0.759975	2.61311e-14	5.17579e-10
EEF1D	8	0.986	0.993	0.609891	4.75259e-14	9.41346e-10
DUSP1	8	0.958	0.915	0.91969	4.98441e-14	9.87263e-10
ANK3	8	0.569	0.271	1.3994	6.2482e-14	1.23758e-09
RPS7	8	1	0.998	0.477645	1.09926e-13	2.1773e-09
UBA52	8	1	0.996	0.495714	1.20128e-13	2.37937e-09
EIF1	8	0.986	0.997	0.573258	1.31961e-13	2.61375e-09
LEPROTL1	8	0.944	0.954	0.754123	1.37777e-13	2.72894e-09
BEX2	8	0.375	0.119	0.770256	2.48462e-13	4.9213e-09
FAAH2	8	0.542	0.236	1.14943	2.52322e-13	4.99775e-09
SBDS	8	0.75	0.609	1.0288	3.81106e-13	7.54858e-09
GAS5	8	0.819	0.769	0.916806	5.57285e-13	1.10382e-08
ANKRD12	8	0.944	0.903	0.958898	6.9945e-13	1.3854e-08
CAMK4	8	0.833	0.685	0.851335	1.09304e-12	2.16499e-08
HIPK2	8	0.361	0.115	0.655896	1.22901e-12	2.4343e-08
RPS20	8	0.958	0.923	0.81339	1.29189e-12	2.55886e-08
CRYBG1	8	0.736	0.607	1.30713	1.79835e-12	3.56199e-08
RPS11	8	1	0.99	0.524326	3.06042e-12	6.06177e-08
INPP4B	8	0.681	0.472	1.10172	3.43565e-12	6.80499e-08
RBFOX2	8	0.944	0.948	0.684972	5.67071e-12	1.1232e-07
PIK3R1	8	0.833	0.765	1.06357	1.24124e-11	2.45853e-07
RPS4Y1	8	0.667	0.425	1.27679	1.29713e-11	2.56922e-07
RPS3	8	0.986	0.999	0.454695	1.4316e-11	2.83557e-07
SNHG8	8	0.764	0.688	0.933332	1.55232e-11	3.07469e-07
RPL27	8	0.986	0.989	0.506832	2.03921e-11	4.03906e-07
SNHG6	8	0.917	0.906	0.692718	2.67063e-11	5.28971e-07
GSPT1	8	0.861	0.844	0.933998	3.28264e-11	6.50193e-07
CIRBP	8	0.889	0.904	0.8986	3.80591e-11	7.53837e-07
SOCS1	8	0.569	0.315	1.01397	4.29902e-11	8.51508e-07
COMMD6	8	0.917	0.95	0.699073	4.92722e-11	9.75935e-07
TNFAIP3	8	0.944	0.931	0.74258	7.64502e-11	1.51425e-06
RPS4X	8	1	0.997	0.437585	1.30824e-10	2.59123e-06
RPL15	8	1	0.997	0.42848	1.3382e-10	2.65058e-06
AREG	8	0.278	0.08	0.825352	1.37893e-10	2.73125e-06
RPL7	8	0.986	0.983	0.552813	1.69735e-10	3.36194e-06
CCR7	8	0.556	0.294	1.0068	2.09516e-10	4.14989e-06
DDX5	8	0.972	0.984	0.563671	2.98673e-10	5.91582e-06
TCF7	8	0.681	0.359	0.820471	3.18523e-10	6.30898e-06
LEF1	8	0.736	0.446	0.789922	3.40197e-10	6.73829e-06
SORL1	8	0.583	0.322	0.895398	4.0787e-10	8.07869e-06
RPS24	8	1	0.999	0.388549	4.76995e-10	9.44784e-06
TRAT1	8	0.653	0.459	0.916965	5.0153e-10	9.93381e-06
RPL41	8	1	0.998	0.387803	5.33605e-10	1.05691e-05
CCR4	8	0.292	0.09	0.632966	5.34417e-10	1.05852e-05
MBP	8	0.806	0.764	0.671858	6.11591e-10	1.21138e-05
SOCS3	8	0.681	0.481	0.835628	7.49375e-10	1.48429e-05
RPL4	8	1	0.982	0.552749	1.40944e-09	2.79169e-05
PDCD4	8	0.778	0.661	0.777825	1.47995e-09	2.93133e-05
NACA	8	0.986	0.996	0.390577	1.59164e-09	3.15256e-05
SRRM2	8	0.944	0.927	0.635563	2.3513e-09	4.65722e-05
CMTM8	8	0.542	0.329	0.913287	4.42588e-09	8.76634e-05
RPL7A	8	0.986	0.999	0.380172	5.4301e-09	0.000107554
USP3	8	0.792	0.784	0.788289	1.17217e-08	0.000232171
RPL31	8	0.972	0.989	0.412523	1.8467e-08	0.000365776
GSTK1	8	0.889	0.957	0.559664	3.80571e-08	0.000753798
RNASET2	8	0.806	0.805	0.742699	3.89081e-08	0.000770653
HLA-B	8	1	0.999	0.363582	3.91636e-08	0.000775713
NR3C1	8	0.736	0.7	0.963336	6.83117e-08	0.00135305
CD69	8	0.958	0.949	0.632173	6.89613e-08	0.00136592
DDIT4	8	0.722	0.559	0.847072	9.2771e-08	0.00183751
RNF125	8	0.806	0.809	0.832934	1.0376e-07	0.00205517
RACK1	8	1	0.997	0.352099	1.15529e-07	0.00228828
GATA3	8	0.694	0.602	0.977658	1.29906e-07	0.00257306
ARMH1	8	0.319	0.134	0.709949	1.53094e-07	0.00303233
DDX21	8	0.778	0.736	0.840133	1.98162e-07	0.003925
RPL8	8	1	0.999	0.386015	2.00958e-07	0.00398038
KLF2	8	0.986	0.978	0.665609	2.03393e-07	0.0040286
IL4R	8	0.472	0.292	0.698613	2.18167e-07	0.00432123
PTGER4	8	0.694	0.586	0.769069	2.90259e-07	0.00574917
TNFSF8	8	0.486	0.288	0.705286	3.19612e-07	0.00633056
AP000787.1	8	0.319	0.137	0.629239	3.22479e-07	0.00638735
HLA-C	8	1	0.999	0.339707	3.88183e-07	0.00768875
CYLD	8	0.764	0.8	0.746976	4.09813e-07	0.00811718
PFDN5	8	0.972	0.985	0.482495	4.46882e-07	0.00885138
IKZF1	8	0.806	0.822	0.757713	4.56263e-07	0.00903721
FP236383.3	8	1	0.999	0.740281	5.22676e-07	0.0103526
ICOS	8	0.861	0.922	0.796249	6.00744e-07	0.0118989
RPS9	8	0.986	0.996	0.35522	6.54731e-07	0.0129683
EIF4B	8	0.75	0.786	0.650602	6.83363e-07	0.0135354
CD55	8	0.75	0.761	0.619258	9.31886e-07	0.0184579
PHF1	8	0.361	0.183	0.658573	1.01222e-06	0.0200491
EEF2	8	0.986	0.987	0.421701	1.02368e-06	0.0202761
CREM	8	0.806	0.785	0.587561	1.04213e-06	0.0206415
HOOK2	8	0.583	0.473	0.884503	1.14852e-06	0.0227487
S1PR1	8	0.681	0.644	0.715911	1.33119e-06	0.0263668
HLA-E	8	1	0.996	0.362328	1.35747e-06	0.0268874
RNF149	8	0.792	0.801	0.693924	1.68615e-06	0.0333976
MAML2	8	0.569	0.399	0.721618	2.36187e-06	0.0467816
LAG3	5	0.962	0.552	1.67414	8.05246e-131	1.59495e-126
GZMA	5	0.92	0.467	1.81938	5.54979e-128	1.09925e-123
CCL5	5	0.901	0.506	2.18323	9.08277e-121	1.79902e-116
NKG7	5	0.939	0.456	1.78058	2.01793e-120	3.99692e-116
CST7	5	0.979	0.775	1.16483	7.32207e-105	1.45028e-100
HCST	5	0.986	0.924	1.06461	1.95665e-104	3.87554e-100
PRF1	5	0.87	0.517	1.37885	6.72566e-92	1.33215e-87
GZMK	5	0.792	0.435	1.71264	4.89846e-86	9.70239e-82
HAVCR2	5	0.731	0.373	0.944219	6.0681e-79	1.20191e-74
F2R	5	0.762	0.396	0.915388	1.52993e-78	3.03033e-74
CXCR6	5	0.481	0.148	0.815524	7.84132e-75	1.55313e-70
SYTL2	5	0.63	0.282	0.902546	7.73367e-72	1.53181e-67
PLAAT4	5	0.953	0.879	0.87817	2.67367e-69	5.29573e-65
CCL4	5	0.502	0.171	1.93668	5.70287e-68	1.12957e-63
LITAF	5	0.962	0.866	0.728007	3.49745e-64	6.9274e-60
CLIC3	5	0.458	0.16	0.706158	6.27734e-61	1.24335e-56
GZMB	5	0.467	0.16	1.45662	9.44733e-60	1.87123e-55
CEBPD	5	0.604	0.283	0.941575	1.08995e-54	2.15885e-50
LAPTM5	5	0.993	0.968	0.602933	8.23709e-54	1.63152e-49
IL10	5	0.288	0.072	0.725064	1.16468e-52	2.30688e-48
MXD4	5	0.875	0.671	0.707282	9.62261e-52	1.90595e-47
LYST	5	0.861	0.692	0.691639	7.39503e-48	1.46473e-43
FGFBP2	5	0.514	0.231	0.928018	3.90965e-45	7.74384e-41
DTHD1	5	0.474	0.206	0.573664	3.95001e-45	7.82378e-41
CD81	5	0.936	0.814	0.588357	1.04434e-43	2.06852e-39
CBLB	5	0.955	0.892	0.647067	1.9651e-43	3.89227e-39
SRGN	5	0.995	0.988	0.542545	1.63718e-42	3.24275e-38
LBH	5	0.889	0.785	0.638093	2.55169e-41	5.05413e-37
IKZF3	5	0.835	0.632	0.63176	3.88033e-41	7.68577e-37
AHNAK	5	0.943	0.791	0.679447	5.69942e-40	1.12888e-35
LIMD2	5	0.998	0.987	0.460836	8.81945e-40	1.74687e-35
PLEK	5	0.545	0.283	0.721539	9.91165e-40	1.9632e-35
PTMS	5	0.757	0.503	0.823507	2.00289e-39	3.96713e-35
MSN	5	0.953	0.898	0.547081	2.9685e-39	5.8797e-35
GZMH	5	0.55	0.264	0.891585	4.67475e-39	9.25928e-35
CD3E	5	0.991	0.99	0.389506	3.40268e-38	6.73969e-34
ITGAL	5	0.774	0.601	0.636197	2.10227e-37	4.16397e-33
PTPRJ	5	0.87	0.738	0.598454	2.97571e-37	5.89399e-33
ZBP1	5	0.71	0.477	0.574584	4.55297e-37	9.01807e-33
TGFBR3	5	0.717	0.508	0.668342	5.12093e-37	1.0143e-32
CD99	5	0.991	0.939	0.485549	2.14559e-36	4.24977e-32
VPS37B	5	0.783	0.609	0.61037	1.35935e-35	2.69245e-31
B2M	5	1	1	0.261841	8.8583e-35	1.75456e-30
APOBEC3G	5	0.755	0.565	0.565075	1.13527e-34	2.24863e-30
CD38	5	0.825	0.64	0.636781	1.02138e-33	2.02306e-29
MRPL10	5	0.866	0.735	0.52661	3.10015e-33	6.14046e-29
SAMSN1	5	0.92	0.865	0.611879	5.47807e-33	1.08504e-28
ITGA4	5	0.896	0.754	0.617978	9.93976e-33	1.96877e-28
LYAR	5	0.792	0.6	0.649082	1.79792e-32	3.56113e-28
TMSB4X	5	1	1	0.306488	3.02805e-32	5.99766e-28
TC2N	5	0.759	0.57	0.535338	5.82485e-32	1.15373e-27
TIMD4	5	0.307	0.117	0.509678	8.26923e-32	1.63789e-27
IL2RG	5	0.995	0.976	0.415362	8.39475e-32	1.66275e-27
MYO1F	5	0.816	0.662	0.496611	1.59028e-31	3.14986e-27
SAMD3	5	0.776	0.597	0.550573	1.66448e-31	3.29684e-27
FCMR	5	0.882	0.792	0.526106	1.83326e-30	3.63113e-26
FYN	5	0.969	0.94	0.422696	3.4518e-30	6.83697e-26
PRDM1	5	0.84	0.648	0.487254	8.65966e-30	1.71522e-25
PPP1R18	5	0.906	0.821	0.450311	1.15681e-29	2.2913e-25
CLDND1	5	0.877	0.8	0.757444	3.32285e-29	6.58156e-25
S1PR4	5	0.906	0.813	0.517922	5.68344e-29	1.12572e-24
PIP4K2A	5	0.807	0.685	0.510885	6.2911e-29	1.24608e-24
PDCD1	5	0.58	0.382	0.594131	1.86018e-28	3.68446e-24
UCP2	5	0.969	0.953	0.507986	2.3365e-28	4.6279e-24
CD4	5	0.837	0.765	0.547886	2.86597e-28	5.67663e-24
LCK	5	0.981	0.939	0.391863	7.84908e-28	1.55467e-23
MCTP2	5	0.462	0.258	0.458999	9.5061e-28	1.88287e-23
SLFN5	5	0.807	0.72	0.590876	1.85639e-27	3.67696e-23
CD52	5	1	0.995	0.379096	2.41609e-27	4.78555e-23
AC015849.1	5	0.29	0.116	0.375861	3.74029e-27	7.40839e-23
PAM	5	0.691	0.522	0.559492	8.85212e-27	1.75334e-22
LINC02384	5	0.366	0.178	0.369828	9.05811e-27	1.79414e-22
LSP1	5	0.983	0.974	0.393284	1.00116e-26	1.983e-22
CTLA4	5	0.917	0.84	0.514666	1.02726e-26	2.03469e-22
TNFRSF1B	5	0.917	0.816	0.53333	2.10132e-26	4.16209e-22
CLEC2B	5	0.884	0.807	0.523632	6.54188e-26	1.29575e-21
RABGAP1L	5	0.913	0.876	0.445095	6.75362e-26	1.33769e-21
RAP1B	5	0.974	0.935	0.389626	7.93818e-26	1.57232e-21
PTPRCAP	5	0.993	0.988	0.346256	1.03404e-25	2.04813e-21
UBE2F	5	0.75	0.625	0.530984	1.0804e-25	2.13995e-21
CD2	5	0.953	0.923	0.427095	1.61259e-25	3.19406e-21
OSTF1	5	0.858	0.752	0.44683	2.29599e-25	4.54766e-21
MAF	5	0.804	0.682	0.505955	3.31724e-25	6.57045e-21
CD3D	5	0.993	0.984	0.35844	3.67135e-25	7.27185e-21
THEMIS2	5	0.415	0.23	0.427664	4.82352e-25	9.55395e-21
IFNG-AS1	5	0.368	0.179	0.441573	5.96914e-25	1.18231e-20
CHST12	5	0.585	0.416	0.468643	8.90823e-25	1.76445e-20
CTSC	5	0.877	0.776	0.406623	5.03964e-24	9.98202e-20
CCR5	5	0.415	0.236	0.40831	5.04578e-24	9.99418e-20
ATP5F1E	5	1	0.998	0.254985	8.38163e-24	1.66015e-19
PYHIN1	5	0.807	0.709	0.499916	2.16344e-23	4.28512e-19
APBB1IP	5	0.922	0.866	0.398854	3.14472e-23	6.22876e-19
SASH3	5	0.795	0.673	0.441432	5.52889e-23	1.09511e-18
ATP2B4	5	0.762	0.624	0.480003	5.71009e-23	1.131e-18
P2RY8	5	0.882	0.817	0.439055	6.72353e-23	1.33173e-18
GIMAP4	5	0.847	0.744	0.46113	8.58602e-23	1.70063e-18
ADAM8	5	0.469	0.284	0.384647	1.25075e-22	2.47737e-18
DENND2D	5	0.644	0.503	0.489324	2.39524e-22	4.74425e-18
EVL	5	0.965	0.955	0.376444	2.73812e-22	5.42339e-18
CXCR3	5	0.816	0.632	0.493827	3.87852e-22	7.68219e-18
HLA-C	5	0.998	0.999	0.307482	5.85283e-22	1.15927e-17
HNRNPLL	5	0.835	0.742	0.483813	8.02765e-22	1.59004e-17
WIPF1	5	0.958	0.933	0.372485	8.65211e-22	1.71372e-17
IFNG	5	0.557	0.36	0.55996	1.93553e-21	3.83371e-17
IFI27L2	5	0.804	0.704	0.438647	2.26013e-21	4.47664e-17
INPP5D	5	0.792	0.711	0.414746	2.46562e-21	4.88366e-17
ARHGAP9	5	0.797	0.718	0.412012	3.7676e-21	7.46248e-17
ANXA1	5	0.825	0.66	0.604744	4.01964e-21	7.9617e-17
POLD4	5	0.858	0.796	0.373662	5.74224e-21	1.13737e-16
ARPC3	5	0.993	0.98	0.270651	6.13413e-21	1.21499e-16
CLEC2D	5	0.901	0.829	0.399221	8.55943e-21	1.69537e-16
TNFSF9	5	0.281	0.129	0.38271	1.00351e-20	1.98765e-16
ABHD17A	5	0.934	0.882	0.385797	1.36146e-20	2.69665e-16
CD44	5	0.96	0.947	0.389919	1.4024e-20	2.77773e-16
CD69	5	0.972	0.946	0.560267	2.79774e-20	5.54149e-16
THEMIS	5	0.54	0.382	0.512537	3.69789e-20	7.32441e-16
SP140	5	0.804	0.743	0.407446	3.95388e-20	7.83146e-16
AL138720.1	5	0.417	0.247	0.454296	4.02501e-20	7.97235e-16
B4GALT1	5	0.715	0.602	0.426993	5.8311e-20	1.15497e-15
NFATC2	5	0.778	0.65	0.403264	6.00105e-20	1.18863e-15
GPSM3	5	0.955	0.935	0.360776	6.08729e-20	1.20571e-15
ARL4C	5	0.981	0.959	0.35281	9.02076e-20	1.78674e-15
GABARAPL2	5	0.856	0.792	0.372354	2.15917e-19	4.27667e-15
TSPO	5	0.936	0.896	0.326522	2.54814e-19	5.04709e-15
IQGAP2	5	0.934	0.888	0.354432	3.26495e-19	6.46689e-15
GALM	5	0.797	0.717	0.421653	3.74359e-19	7.41493e-15
C12orf75	5	0.929	0.742	0.384982	4.65624e-19	9.22262e-15
TRAF3IP3	5	0.868	0.811	0.37849	4.86221e-19	9.63058e-15
ZEB2	5	0.575	0.383	0.506088	5.04995e-19	1.00024e-14
IL10RA	5	0.818	0.716	0.332412	5.66483e-19	1.12203e-14
CDC42SE1	5	0.856	0.805	0.383891	6.00805e-19	1.19001e-14
CD300A	5	0.373	0.216	0.342208	6.89521e-19	1.36573e-14
CYBA	5	0.998	0.985	0.307061	7.58798e-19	1.50295e-14
RNASEK	5	0.967	0.933	0.307418	1.04573e-18	2.07127e-14
TERF2IP	5	0.884	0.834	0.351272	1.17441e-18	2.32616e-14
LGALS3	5	0.816	0.609	0.344037	1.30672e-18	2.58822e-14
CLIC1	5	0.993	0.953	0.337858	1.32802e-18	2.63041e-14
YPEL3	5	0.875	0.834	0.424784	1.43225e-18	2.83686e-14
PRKCQ	5	0.825	0.741	0.380048	1.48904e-18	2.94934e-14
HLA-E	5	1	0.996	0.274318	1.5842e-18	3.13783e-14
IFI27	5	0.585	0.4	0.840323	2.13044e-18	4.21976e-14
YARS	5	0.823	0.732	0.366358	2.18953e-18	4.33681e-14
SLA2	5	0.45	0.304	0.417396	2.8191e-18	5.58379e-14
NFATC3	5	0.752	0.646	0.358705	3.1337e-18	6.20691e-14
MYL6	5	0.998	0.996	0.263543	5.20928e-18	1.0318e-13
AKNA	5	0.637	0.533	0.421654	7.88635e-18	1.56205e-13
ZYX	5	0.866	0.816	0.372763	8.07577e-18	1.59957e-13
CD27	5	0.899	0.856	0.374803	8.66947e-18	1.71716e-13
KLF6	5	0.965	0.953	0.390129	1.0433e-17	2.06647e-13
DPEP2	5	0.351	0.189	0.3228	1.32357e-17	2.6216e-13
GIMAP5	5	0.639	0.522	0.38746	1.62435e-17	3.21735e-13
VAMP5	5	0.842	0.766	0.348451	1.64009e-17	3.24852e-13
DUSP5	5	0.608	0.481	0.468995	1.74049e-17	3.4474e-13
RUNX3	5	0.868	0.788	0.360527	2.12758e-17	4.2141e-13
SH2D2A	5	0.729	0.624	0.375872	2.22546e-17	4.40797e-13
NMRK1	5	0.613	0.495	0.419885	2.37582e-17	4.70578e-13
XBP1	5	0.675	0.572	0.499238	3.41243e-17	6.75901e-13
IL2RB	5	0.634	0.523	0.386665	4.30227e-17	8.5215e-13
ARHGAP25	5	0.653	0.526	0.354504	5.55593e-17	1.10046e-12
SIT1	5	0.802	0.716	0.357753	5.69107e-17	1.12723e-12
CAT	5	0.528	0.397	0.369485	7.53563e-17	1.49258e-12
ITGB2	5	0.922	0.894	0.38159	7.78578e-17	1.54213e-12
GRK5	5	0.568	0.441	0.497421	1.03744e-16	2.05485e-12
AC034238.1	5	0.25	0.121	0.254818	1.14054e-16	2.25907e-12
RAC2	5	0.998	0.984	0.263406	1.18203e-16	2.34124e-12
ZAP70	5	0.842	0.818	0.351611	1.31388e-16	2.6024e-12
CD70	5	0.493	0.32	0.542588	1.54058e-16	3.05143e-12
CAPNS1	5	0.882	0.849	0.33037	2.70645e-16	5.36067e-12
ZBTB38	5	0.644	0.511	0.333557	3.28812e-16	6.51278e-12
TBC1D10C	5	0.87	0.827	0.309344	4.83668e-16	9.58002e-12
GLIPR1	5	0.693	0.601	0.41834	6.20002e-16	1.22804e-11
CD59	5	0.88	0.754	0.358316	7.8544e-16	1.55572e-11
VAMP8	5	0.92	0.88	0.303115	9.82211e-16	1.94547e-11
RASAL3	5	0.665	0.562	0.341889	1.26873e-15	2.51297e-11
PSMB10	5	0.962	0.91	0.314051	1.35197e-15	2.67784e-11
RAB27A	5	0.778	0.662	0.349365	1.79923e-15	3.56373e-11
TNFAIP3	5	0.948	0.929	0.412641	1.97942e-15	3.92064e-11
VAMP2	5	0.901	0.881	0.31741	2.9526e-15	5.84821e-11
SH3BGRL3	5	1	0.998	0.265881	3.0014e-15	5.94487e-11
S100A11	5	0.965	0.903	0.367238	3.12615e-15	6.19196e-11
ARHGAP30	5	0.795	0.707	0.302878	3.67891e-15	7.28681e-11
TENT5C	5	0.917	0.868	0.285633	4.01212e-15	7.9468e-11
NUDT16	5	0.517	0.391	0.476692	4.40189e-15	8.71881e-11
C5orf56	5	0.762	0.682	0.34788	7.02171e-15	1.39079e-10
ARL6IP5	5	0.939	0.919	0.281805	7.51088e-15	1.48768e-10
ADAP1	5	0.42	0.288	0.338734	1.33482e-14	2.64387e-10
TPST2	5	0.578	0.472	0.378807	1.39229e-14	2.75771e-10
SPPL2A	5	0.745	0.678	0.35899	1.45141e-14	2.87481e-10
PBXIP1	5	0.816	0.761	0.347414	1.66323e-14	3.29436e-10
PARP8	5	0.755	0.683	0.362496	1.79996e-14	3.56519e-10
EFHD2	5	0.828	0.765	0.394923	2.14235e-14	4.24336e-10
ATXN7L1	5	0.592	0.477	0.360849	2.31996e-14	4.59515e-10
BRK1	5	0.922	0.878	0.252321	4.77008e-14	9.44809e-10
GATA3	5	0.677	0.596	0.35466	5.66113e-14	1.1213e-09
CD3G	5	0.958	0.94	0.300051	5.79702e-14	1.14822e-09
ATXN1	5	0.882	0.853	0.300432	6.9957e-14	1.38564e-09
TGFBR2	5	0.748	0.634	0.281437	7.44791e-14	1.47521e-09
CCDC107	5	0.637	0.526	0.307016	8.02702e-14	1.58991e-09
CD53	5	0.943	0.927	0.267054	1.11876e-13	2.21592e-09
LPXN	5	0.762	0.704	0.290439	1.13208e-13	2.24232e-09
CCNH	5	0.816	0.763	0.439516	1.15117e-13	2.28011e-09
ANXA11	5	0.908	0.863	0.304643	1.23601e-13	2.44816e-09
PRR5	5	0.436	0.308	0.354646	1.30569e-13	2.58618e-09
GIMAP1	5	0.618	0.511	0.369318	1.43945e-13	2.85113e-09
TMEM50A	5	0.941	0.899	0.291276	1.53589e-13	3.04214e-09
APOBEC3H	5	0.476	0.348	0.418019	1.53817e-13	3.04666e-09
PTPN4	5	0.514	0.38	0.326566	1.55744e-13	3.08482e-09
COPZ1	5	0.724	0.642	0.284896	1.65183e-13	3.27178e-09
ITM2B	5	0.986	0.978	0.29012	2.09558e-13	4.15072e-09
HACD4	5	0.759	0.698	0.321944	2.73124e-13	5.40976e-09
ANXA4	5	0.557	0.447	0.350166	2.84339e-13	5.6319e-09
RSRP1	5	0.854	0.807	0.301621	2.98077e-13	5.90401e-09
CYTH1	5	0.896	0.877	0.287763	2.98398e-13	5.91037e-09
BST2	5	0.894	0.836	0.356673	3.30266e-13	6.54159e-09
ATP6V1G1	5	0.946	0.936	0.253375	3.34244e-13	6.62038e-09
CD37	5	0.948	0.947	0.25755	4.3637e-13	8.64319e-09
IFI6	5	0.939	0.918	0.335825	4.40591e-13	8.72679e-09
EVA1B	5	0.356	0.225	0.632668	4.66907e-13	9.24803e-09
CX3CR1	5	0.285	0.16	0.332746	7.12267e-13	1.41079e-08
DNAJB1	5	0.939	0.917	0.331693	7.19778e-13	1.42566e-08
RIPOR2	5	0.861	0.847	0.305117	8.66147e-13	1.71558e-08
REEP5	5	0.866	0.807	0.272288	1.82786e-12	3.62044e-08
N4BP1	5	0.8	0.754	0.29801	1.94656e-12	3.85555e-08
NCALD	5	0.592	0.471	0.371716	2.09977e-12	4.15902e-08
SYNE1	5	0.667	0.59	0.3139	2.29973e-12	4.55507e-08
SLAMF6	5	0.505	0.402	0.337713	2.56601e-12	5.08249e-08
ATP5IF1	5	0.967	0.937	0.278556	2.98672e-12	5.91579e-08
SNX17	5	0.712	0.66	0.293425	3.82479e-12	7.57576e-08
POU2AF1	5	0.384	0.26	0.290125	4.25416e-12	8.42622e-08
DEF6	5	0.814	0.778	0.265343	4.39423e-12	8.70365e-08
DNAJC1	5	0.821	0.749	0.330667	4.60618e-12	9.12346e-08
BIN2	5	0.858	0.809	0.283479	4.66547e-12	9.2409e-08
LIMS1	5	0.896	0.829	0.333643	5.09865e-12	1.00989e-07
ARF5	5	0.917	0.892	0.275832	9.17736e-12	1.81776e-07
APPL2	5	0.483	0.376	0.334575	1.0504e-11	2.08053e-07
DRAP1	5	0.946	0.92	0.260217	1.05585e-11	2.09132e-07
GGA2	5	0.483	0.393	0.358327	1.0574e-11	2.0944e-07
SPON2	5	0.45	0.336	0.400111	1.11677e-11	2.21199e-07
SUN2	5	0.785	0.72	0.303209	1.21901e-11	2.4145e-07
TPP1	5	0.552	0.443	0.288928	1.56945e-11	3.1086e-07
PRKX	5	0.67	0.598	0.342483	1.59889e-11	3.16693e-07
SSR2	5	0.943	0.923	0.282781	1.74594e-11	3.45819e-07
AUTS2	5	0.314	0.196	0.401835	1.78655e-11	3.53862e-07
LAIR1	5	0.29	0.173	0.276194	1.84117e-11	3.6468e-07
JARID2	5	0.689	0.62	0.307228	1.91778e-11	3.79854e-07
CD2BP2	5	0.606	0.521	0.276586	2.75233e-11	5.45155e-07
CD96	5	0.698	0.615	0.287506	3.19372e-11	6.3258e-07
RNF19A	5	0.936	0.882	0.27289	3.49916e-11	6.93078e-07
EVI2B	5	0.708	0.65	0.312108	4.13755e-11	8.19525e-07
STK17A	5	0.941	0.898	0.264908	4.36705e-11	8.64981e-07
MCL1	5	0.896	0.89	0.297337	4.44454e-11	8.8033e-07
STK10	5	0.804	0.775	0.267949	4.95367e-11	9.81173e-07
RABAC1	5	0.788	0.744	0.293571	5.06515e-11	1.00325e-06
RAB29	5	0.639	0.562	0.331374	5.1313e-11	1.01636e-06
IL16	5	0.54	0.439	0.271234	5.21782e-11	1.03349e-06
DDAH2	5	0.281	0.175	0.282639	6.08068e-11	1.2044e-06
SH3BGRL	5	0.818	0.809	0.259906	6.31956e-11	1.25172e-06
LRMP	5	0.552	0.442	0.358077	6.98729e-11	1.38397e-06
ANTXR2	5	0.502	0.386	0.294934	8.26293e-11	1.63664e-06
SHFL	5	0.667	0.592	0.273243	1.0671e-10	2.1136e-06
TMX4	5	0.7	0.631	0.318712	1.09914e-10	2.17706e-06
ICAM3	5	0.849	0.816	0.252627	1.14338e-10	2.26468e-06
DYNLL1	5	0.844	0.787	0.329911	1.16602e-10	2.30954e-06
GBP2	5	0.887	0.883	0.255525	1.19691e-10	2.37073e-06
STOM	5	0.528	0.441	0.310534	1.21057e-10	2.39778e-06
DNM2	5	0.767	0.731	0.27465	1.25264e-10	2.4811e-06
NEAT1	5	0.903	0.876	0.264851	1.33903e-10	2.65222e-06
IGF2R	5	0.634	0.563	0.302359	1.34993e-10	2.6738e-06
TRANK1	5	0.507	0.414	0.307363	1.47297e-10	2.9175e-06
TMEM256	5	0.823	0.773	0.260733	1.48488e-10	2.94111e-06
CORO7	5	0.84	0.802	0.265861	1.78598e-10	3.5375e-06
DHRS7	5	0.616	0.546	0.281228	1.89735e-10	3.75808e-06
KDM7A	5	0.677	0.606	0.306051	1.93331e-10	3.8293e-06
TRG-AS1	5	0.401	0.293	0.327614	2.06799e-10	4.09607e-06
SNX6	5	0.882	0.853	0.251988	2.10866e-10	4.17662e-06
CEP78	5	0.568	0.485	0.351399	2.32431e-10	4.60377e-06
CTSD	5	0.741	0.686	0.268948	2.42698e-10	4.80713e-06
ERN1	5	0.578	0.483	0.353241	3.05614e-10	6.05329e-06
ZDHHC14	5	0.264	0.164	0.256669	3.3966e-10	6.72765e-06
PREX1	5	0.849	0.819	0.274941	3.52005e-10	6.97216e-06
LGALS1	5	0.896	0.781	0.295036	3.57781e-10	7.08657e-06
NELFCD	5	0.623	0.536	0.2694	3.61923e-10	7.16861e-06
PYCARD	5	0.8	0.769	0.285418	3.81272e-10	7.55185e-06
MAP2K2	5	0.816	0.78	0.263669	3.82743e-10	7.58099e-06
PTPN22	5	0.752	0.712	0.307669	4.0895e-10	8.10008e-06
S100A4	5	0.972	0.983	0.256532	5.64248e-10	1.11761e-05
APOBEC3C	5	0.698	0.627	0.282944	6.12112e-10	1.21241e-05
PTK2B	5	0.54	0.471	0.305232	7.81695e-10	1.5483e-05
RAB8B	5	0.693	0.642	0.287457	9.11056e-10	1.80453e-05
HSD17B11	5	0.453	0.349	0.252859	1.069e-09	2.11736e-05
UTRN	5	0.863	0.822	0.256728	1.11522e-09	2.20891e-05
GIMAP7	5	0.887	0.823	0.27411	1.32169e-09	2.61788e-05
HOPX	5	0.302	0.196	0.479665	1.35283e-09	2.67955e-05
DUSP2	5	0.821	0.767	0.523071	1.44084e-09	2.85387e-05
GPR183	5	0.811	0.77	0.276884	1.56866e-09	3.10705e-05
CFLAR	5	0.863	0.848	0.271883	2.07946e-09	4.11878e-05
RAPGEF1	5	0.722	0.68	0.295996	2.31367e-09	4.58268e-05
LINC01943	5	0.571	0.477	0.298592	2.51871e-09	4.98881e-05
CPNE3	5	0.585	0.532	0.261983	3.30023e-09	6.53677e-05
APMAP	5	0.491	0.415	0.278421	3.65514e-09	7.23974e-05
TRBC2	5	0.908	0.881	0.27553	3.65595e-09	7.24134e-05
SYNRG	5	0.632	0.58	0.260029	3.90672e-09	7.73805e-05
CLN3	5	0.422	0.33	0.263865	4.68412e-09	9.27784e-05
ZNF652	5	0.382	0.282	0.255914	5.93838e-09	0.000117622
RNF214	5	0.347	0.25	0.288222	7.08086e-09	0.000140251
WHRN	5	0.342	0.242	0.291674	7.73082e-09	0.000153124
PPP3CA	5	0.509	0.417	0.290071	1.35437e-08	0.000268261
JUN	5	0.894	0.865	0.393997	1.39232e-08	0.000275776
MACF1	5	0.764	0.738	0.294548	1.45451e-08	0.000288094
TRADD	5	0.675	0.63	0.257692	1.80269e-08	0.000357059
PIK3CG	5	0.366	0.287	0.274373	1.81981e-08	0.000360449
ISG15	5	0.96	0.943	0.279227	2.34368e-08	0.000464213
TGFB1	5	0.917	0.915	0.280729	2.49183e-08	0.000493557
STAT4	5	0.658	0.623	0.336169	3.33899e-08	0.000661353
NCOA3	5	0.679	0.637	0.293601	3.77575e-08	0.000747862
AKIRIN2	5	0.613	0.572	0.311305	4.12405e-08	0.00081685
RGS1	5	0.884	0.848	0.257079	4.24629e-08	0.000841063
SMAD7	5	0.488	0.411	0.323871	6.17011e-08	0.00122211
GBP5	5	0.79	0.756	0.302675	6.59027e-08	0.00130534
FKBP11	5	0.483	0.422	0.344525	7.53283e-08	0.00149203
OXNAD1	5	0.519	0.455	0.269524	1.20281e-07	0.0023824
ARAP2	5	0.788	0.744	0.263114	1.26414e-07	0.00250389
SAMD9L	5	0.521	0.446	0.257896	1.37391e-07	0.0027213
CD6	5	0.802	0.743	0.278365	1.43525e-07	0.0028428
TIPARP	5	0.62	0.58	0.268793	1.56467e-07	0.00309914
ARHGAP26	5	0.45	0.38	0.279456	1.73787e-07	0.0034422
ZFP36	5	0.955	0.938	0.35157	1.89981e-07	0.00376295
CA5B	5	0.573	0.525	0.290818	2.5722e-07	0.00509476
GK5	5	0.304	0.229	0.27091	3.9682e-07	0.00785981
CARD8	5	0.571	0.528	0.257229	4.07624e-07	0.00807381
NPC1	5	0.465	0.402	0.309589	4.31798e-07	0.00855263
GTDC1	5	0.519	0.45	0.272597	4.92204e-07	0.00974908
PCID2	5	0.498	0.45	0.284993	6.72991e-07	0.0133299
BHLHE40	5	0.592	0.527	0.379332	7.15619e-07	0.0141743
IRF2	5	0.545	0.503	0.259339	1.20475e-06	0.0238624
TAGAP	5	0.83	0.81	0.288311	1.25363e-06	0.0248307
LAIR2	5	0.283	0.196	0.281685	1.9523e-06	0.0386691
TMSB4X	6	1	1	0.283038	1.96182e-34	3.88578e-30
PLAAT4	6	0.956	0.879	0.516386	3.24949e-34	6.43627e-30
NOSIP	6	0.93	0.837	0.657176	2.99382e-33	5.92985e-29
CNN2	6	0.985	0.949	0.402281	4.11533e-33	8.15123e-29
GZMK	6	0.695	0.446	0.940589	1.81364e-32	3.59227e-28
CD52	6	1	0.995	0.417712	1.01142e-30	2.00333e-26
GZMA	6	0.746	0.486	0.835593	2.1352e-30	4.2292e-26
SH3BGRL3	6	1	0.998	0.324805	1.23234e-29	2.44089e-25
ATP5F1E	6	1	0.998	0.265178	1.76422e-27	3.49439e-23
ANXA1	6	0.879	0.655	0.608551	1.20546e-26	2.38765e-22
TC2N	6	0.753	0.572	0.452837	1.03383e-25	2.04771e-21
IFITM1	6	1	0.995	0.352642	1.14081e-24	2.25961e-20
P2RY8	6	0.925	0.812	0.432035	3.66952e-24	7.26822e-20
ITGA4	6	0.893	0.755	0.474833	1.46377e-23	2.89929e-19
IFITM2	6	0.993	0.969	0.447086	8.31376e-23	1.64671e-18
ITGB1	6	0.925	0.852	0.514322	9.36817e-22	1.85555e-17
CD99	6	0.99	0.939	0.336262	1.09473e-21	2.16833e-17
S100A11	6	0.969	0.903	0.402591	9.5022e-21	1.8821e-16
COTL1	6	0.988	0.951	0.357574	3.95832e-20	7.84025e-16
ARPC2	6	0.995	0.987	0.27759	6.09685e-20	1.2076e-15
LITAF	6	0.939	0.869	0.335963	9.10434e-19	1.8033e-14
TGFBR3	6	0.666	0.514	0.417264	4.65826e-17	9.22661e-13
CCL5	6	0.707	0.528	0.609973	9.75445e-17	1.93206e-12
PLAC8	6	0.668	0.459	0.280472	1.51255e-16	2.9959e-12
CD96	6	0.736	0.611	0.328681	6.31766e-16	1.25134e-11
ABLIM1	6	0.799	0.676	0.365931	1.06322e-15	2.10591e-11
ZFP36L2	6	0.944	0.913	0.357418	2.4839e-15	4.91985e-11
MRPL10	6	0.823	0.74	0.357952	7.3403e-15	1.45389e-10
GZMM	6	0.731	0.62	0.356539	7.5948e-15	1.5043e-10
SYTL2	6	0.455	0.301	0.30163	1.14256e-14	2.26306e-10
PCED1B-AS1	6	0.985	0.972	0.253831	5.10158e-14	1.01047e-09
DUSP2	6	0.85	0.764	0.492033	8.27071e-14	1.63818e-09
LYAR	6	0.714	0.608	0.537009	1.36727e-13	2.70814e-09
USP36	6	0.7	0.619	0.364488	2.15554e-13	4.26947e-09
HCST	6	0.949	0.928	0.332243	2.98601e-13	5.91438e-09
BHLHE40	6	0.646	0.522	0.382577	7.21506e-13	1.42909e-08
PTGER4	6	0.68	0.578	0.364224	2.74285e-12	5.43277e-08
RNF19A	6	0.927	0.883	0.312709	3.68634e-12	7.30153e-08
MXD4	6	0.794	0.68	0.289012	5.52417e-12	1.09417e-07
SAMSN1	6	0.906	0.867	0.325793	7.59194e-12	1.50374e-07
LEPROTL1	6	0.964	0.953	0.277727	1.65831e-11	3.28462e-07
STK17A	6	0.93	0.899	0.274376	2.57937e-11	5.10897e-07
PARP8	6	0.734	0.686	0.309849	5.14653e-11	1.01937e-06
YPEL5	6	0.881	0.829	0.287891	6.66138e-11	1.31942e-06
RNF125	6	0.852	0.804	0.292481	7.67536e-11	1.52026e-06
JUN	6	0.896	0.865	0.356209	8.06683e-11	1.5978e-06
PDCD1	6	0.492	0.392	0.324689	1.32838e-10	2.63112e-06
SERINC5	6	0.644	0.548	0.290636	2.2882e-10	4.53223e-06
CLEC2B	6	0.879	0.808	0.28664	2.8128e-10	5.57131e-06
TNFAIP3	6	0.944	0.929	0.304426	2.96241e-10	5.86765e-06
LYST	6	0.768	0.703	0.282891	8.79138e-10	1.74131e-05
LBH	6	0.855	0.789	0.277438	1.02575e-09	2.0317e-05
ARRDC2	6	0.533	0.43	0.273507	1.43811e-09	2.84846e-05
LINC01138	6	0.392	0.283	0.2767	1.9666e-09	3.89524e-05
UBE2F	6	0.702	0.631	0.296513	1.99663e-09	3.95473e-05
MGAT4A	6	0.613	0.512	0.285689	2.39472e-09	4.74323e-05
CDK17	6	0.787	0.733	0.302572	3.04339e-09	6.02803e-05
IL7R	6	0.663	0.557	0.383927	3.06919e-09	6.07913e-05
SIK3	6	0.857	0.834	0.262284	4.82318e-09	9.55327e-05
SLFN5	6	0.768	0.725	0.290062	7.25037e-09	0.000143608
TLN1	6	0.814	0.778	0.254388	1.05297e-08	0.000208561
SMAD7	6	0.506	0.41	0.258597	1.7926e-08	0.00035506
KLRG1	6	0.324	0.232	0.307345	3.70848e-08	0.000734538
CA5B	6	0.603	0.522	0.250864	5.98129e-08	0.00118471
STAT4	6	0.688	0.62	0.261026	1.39675e-07	0.00276654
ID2	6	0.627	0.542	0.382628	1.41052e-07	0.00279383
MT2A	6	0.956	0.928	0.34523	1.84595e-07	0.00365628
BACH2	6	0.738	0.651	0.259821	2.05438e-07	0.0040691
NR4A2	6	0.782	0.717	0.309139	3.74785e-07	0.00742336
HMGN2	6	0.983	0.938	0.275076	4.34808e-07	0.00861225
FOS	6	0.944	0.914	0.276347	4.9164e-07	0.00973791
CCNH	6	0.787	0.766	0.300607	1.48128e-06	0.0293398
CDC20	3	0.765	0.21	0.942089	2.24869e-183	4.45398e-179
CCNB1	3	0.749	0.232	0.927271	1.10368e-156	2.18605e-152
CCNB2	3	0.842	0.326	0.806635	7.87777e-133	1.56035e-128
PTTG1	3	0.973	0.566	0.928075	1.08728e-132	2.15358e-128
PGAM1	3	0.995	0.866	0.823067	6.96253e-128	1.37907e-123
CDKN3	3	0.845	0.323	0.645359	7.88717e-125	1.56221e-120
HNRNPA2B1	3	1	0.978	0.729768	4.72679e-123	9.36236e-119
RAN	3	0.998	0.886	0.847792	1.86052e-122	3.68512e-118
FABP5	3	0.962	0.555	0.941725	6.16143e-119	1.22039e-114
TPI1	3	1	0.873	0.853488	1.904e-118	3.77125e-114
ANXA2	3	0.993	0.826	0.865207	2.38856e-116	4.73102e-112
AC004448.2	3	0.851	0.43	1.26505	2.14337e-115	4.24538e-111
GAPDH	3	1	0.998	0.646403	2.22735e-114	4.41172e-110
BIRC5	3	0.907	0.396	0.702896	4.58179e-111	9.07515e-107
PLK1	3	0.632	0.189	0.549216	6.08719e-106	1.20569e-101
JPT1	3	0.996	0.842	0.727571	1.43017e-105	2.83274e-101
SNRPG	3	0.996	0.878	0.660678	3.15407e-104	6.24727e-100
MRPL51	3	0.974	0.7	0.679332	8.03743e-102	1.59197e-97
TUBA1B	3	0.989	0.712	1.06741	9.36307e-100	1.85454e-95
HSP90B1	3	0.984	0.746	0.738935	2.18604e-97	4.32989e-93
PPIA	3	1	0.991	0.544855	4.15504e-97	8.2299e-93
PRDX3	3	0.969	0.651	0.669388	1.42618e-95	2.82484e-91
DLGAP5	3	0.639	0.217	0.509444	2.38882e-95	4.73154e-91
ANP32E	3	0.995	0.71	0.684346	4.22282e-93	8.36414e-89
LDHA	3	1	0.901	0.723708	4.01384e-92	7.95022e-88
CCT5	3	0.962	0.626	0.65028	1.59995e-91	3.16902e-87
PHF19	3	0.967	0.604	0.680056	1.67914e-91	3.32588e-87
C12orf75	3	0.991	0.727	0.732628	2.16609e-91	4.29036e-87
IGHM	3	0.419	0.098	0.312084	4.49112e-89	8.89556e-85
PSMA7	3	0.998	0.914	0.561724	2.24996e-88	4.45649e-84
ACTR3	3	0.998	0.879	0.591269	1.05433e-86	2.0883e-82
ATP5MC3	3	0.998	0.917	0.568908	3.25157e-86	6.44039e-82
PRDX1	3	0.993	0.853	0.707816	3.34635e-86	6.62812e-82
AHSA1	3	0.867	0.442	0.490227	8.44997e-86	1.67369e-81
H2AFZ	3	0.998	0.865	0.793577	9.4694e-86	1.8756e-81
MCM2	3	0.783	0.334	0.493632	9.58931e-86	1.89935e-81
SLIRP	3	0.984	0.72	0.589278	2.30704e-85	4.56956e-81
YWHAQ	3	0.993	0.831	0.634598	4.91555e-85	9.73622e-81
LSM5	3	0.978	0.654	0.583685	5.35769e-83	1.0612e-78
BANF1	3	0.962	0.659	0.609615	2.60265e-82	5.15506e-78
ACTB	3	1	0.999	0.471399	5.50844e-82	1.09106e-77
CALR	3	0.991	0.82	0.732813	1.62385e-81	3.21636e-77
BCL2L12	3	0.778	0.343	0.429393	1.79205e-81	3.54951e-77
LSM4	3	0.98	0.644	0.602875	1.30976e-80	2.59424e-76
CHCHD2	3	1	0.973	0.470426	3.31597e-80	6.56794e-76
HMGB2	3	0.998	0.855	0.744099	4.14007e-80	8.20023e-76
CENPW	3	0.843	0.39	0.492526	8.72236e-80	1.72764e-75
RPA3	3	0.985	0.683	0.608056	3.59366e-79	7.11797e-75
S100A11	3	1	0.896	0.69691	4.05773e-79	8.03715e-75
TXN	3	0.998	0.907	0.598744	1.72358e-78	3.41389e-74
SLC1A5	3	0.592	0.209	0.326702	1.73648e-78	3.43945e-74
PFN1	3	1	0.999	0.451638	7.18381e-78	1.4229e-73
APOBEC3B	3	0.512	0.161	0.333544	6.23474e-77	1.23492e-72
CDK2AP2	3	0.987	0.713	0.584656	2.42313e-76	4.7995e-72
GNG5	3	0.998	0.913	0.512941	2.96684e-76	5.87642e-72
ENO1	3	0.998	0.927	0.600543	4.20433e-76	8.32752e-72
DTYMK	3	0.825	0.407	0.497906	8.31627e-76	1.6472e-71
MANF	3	0.82	0.418	0.534464	8.60564e-76	1.70452e-71
ACTG1	3	1	0.993	0.479903	1.82972e-75	3.62412e-71
IFNG	3	0.754	0.325	0.58658	7.21337e-74	1.42875e-69
HSPE1	3	0.984	0.787	0.723908	3.86143e-73	7.64834e-69
COX6A1	3	1	0.962	0.439125	3.93267e-73	7.78944e-69
TROAP	3	0.727	0.3	0.362782	9.43394e-73	1.86858e-68
NKG7	3	0.885	0.448	0.753394	1.65246e-72	3.27304e-68
PRELID1	3	0.982	0.805	0.551768	3.87179e-72	7.66885e-68
RANBP1	3	0.971	0.651	0.638249	4.04035e-72	8.00273e-68
ARPC5	3	0.996	0.894	0.515127	5.95154e-72	1.17882e-67
SDF2L1	3	0.883	0.497	0.557727	9.16408e-72	1.81513e-67
DCTPP1	3	0.86	0.457	0.47894	9.28503e-71	1.83909e-66
DYNLL1	3	0.989	0.765	0.592374	4.47825e-70	8.87007e-66
TPX2	3	0.769	0.347	0.53678	1.59662e-69	3.16243e-65
PTMS	3	0.876	0.478	0.642188	2.21141e-69	4.38014e-65
NME1	3	0.896	0.536	0.600238	4.5731e-69	9.05794e-65
GSTP1	3	0.969	0.678	0.63154	4.69283e-69	9.29509e-65
EBNA1BP2	3	0.774	0.375	0.40015	8.10444e-69	1.60525e-64
TUBB	3	0.989	0.727	0.699096	9.46999e-69	1.87572e-64
PPIB	3	1	0.958	0.473527	7.04767e-68	1.39593e-63
PMVK	3	0.933	0.561	0.51527	1.11619e-67	2.21084e-63
MSH6	3	0.709	0.31	0.409508	1.46868e-67	2.90902e-63
CREG1	3	0.594	0.228	0.313844	1.56683e-67	3.10341e-63
CCT6A	3	0.969	0.689	0.562353	2.21061e-67	4.37856e-63
HSP90AA1	3	1	0.986	0.566443	2.22895e-67	4.41488e-63
PSMA4	3	0.996	0.806	0.504878	3.78e-67	7.48704e-63
PTGES3	3	0.995	0.827	0.524542	8.18288e-67	1.62078e-62
ZEB2	3	0.761	0.349	0.565922	2.39413e-66	4.74205e-62
SNRPE	3	0.982	0.725	0.522386	3.18623e-66	6.31096e-62
FKBP2	3	0.856	0.439	0.421601	3.87703e-66	7.67923e-62
LGALS1	3	0.965	0.767	0.913139	1.02877e-65	2.03769e-61
MRPL18	3	0.862	0.469	0.411084	4.12306e-65	8.16654e-61
PSMA5	3	0.991	0.801	0.462678	8.78619e-65	1.74028e-60
MRPL13	3	0.913	0.516	0.422139	2.51371e-64	4.97891e-60
HMGB3	3	0.785	0.367	0.360978	4.08326e-64	8.08772e-60
NDUFC1	3	0.989	0.775	0.487608	4.32513e-64	8.56679e-60
PSMA2	3	0.998	0.837	0.468071	1.4665e-63	2.90469e-59
PLEK	3	0.63	0.262	0.484336	2.62051e-63	5.19043e-59
HSPD1	3	0.978	0.764	0.660387	3.63236e-63	7.19462e-59
CACYBP	3	0.98	0.815	0.527615	4.55599e-63	9.02405e-59
POLR2L	3	0.987	0.839	0.485548	1.0279e-62	2.03596e-58
HMGN2	3	1	0.934	0.576805	1.05874e-62	2.09704e-58
TPM3	3	0.998	0.976	0.408104	1.67522e-62	3.31812e-58
ALYREF	3	0.974	0.761	0.557986	2.09628e-62	4.1521e-58
CORO1A	3	0.998	0.989	0.395836	3.04907e-62	6.03929e-58
ANAPC11	3	0.996	0.716	0.508485	5.71811e-62	1.13259e-57
HMGB1	3	1	0.988	0.511519	1.05178e-61	2.08326e-57
EIF1AX	3	0.949	0.643	0.512758	1.26423e-61	2.50406e-57
HSP90AB1	3	0.991	0.905	0.761256	1.66112e-61	3.29019e-57
FGFBP2	3	0.556	0.216	0.595275	2.49938e-61	4.95052e-57
CALM1	3	1	0.994	0.364164	4.47395e-61	8.86155e-57
PSME2	3	1	0.925	0.466165	6.18019e-61	1.22411e-56
RAB27A	3	0.96	0.632	0.520251	9.48409e-61	1.87851e-56
COX8A	3	1	0.96	0.433234	1.53575e-60	3.04187e-56
COX20	3	0.927	0.546	0.425532	1.64831e-60	3.26481e-56
MIF	3	1	0.962	0.568242	2.01422e-60	3.98957e-56
ARHGAP10	3	0.683	0.303	0.408312	2.2939e-60	4.54353e-56
CLIC1	3	1	0.95	0.453471	2.46234e-60	4.87716e-56
PDIA6	3	0.96	0.693	0.510204	3.53565e-60	7.00306e-56
EXOSC3	3	0.667	0.287	0.278896	3.55434e-60	7.04007e-56
STMN1	3	0.989	0.607	0.616558	4.34449e-60	8.60512e-56
TCP1	3	0.931	0.651	0.518142	6.23793e-60	1.23555e-55
YWHAH	3	0.936	0.569	0.461798	1.49123e-59	2.95367e-55
PSMB2	3	0.98	0.759	0.481336	4.53183e-59	8.9762e-55
NUCKS1	3	0.984	0.744	0.492163	2.16976e-58	4.29765e-54
PSMB5	3	0.694	0.314	0.300135	3.39047e-58	6.7155e-54
CAP1	3	0.996	0.903	0.442258	4.13726e-58	8.19467e-54
ARPC2	3	1	0.986	0.361363	8.33029e-58	1.64998e-53
HSBP1	3	0.922	0.579	0.413114	8.37403e-58	1.65864e-53
BUB1	3	0.616	0.258	0.323679	1.45933e-57	2.8905e-53
MCM4	3	0.807	0.385	0.399898	2.3881e-57	4.7301e-53
PSMB3	3	1	0.884	0.42097	3.57451e-57	7.08004e-53
PRF1	3	0.883	0.503	0.519807	8.37575e-57	1.65898e-52
FARSB	3	0.71	0.336	0.332378	8.77194e-57	1.73746e-52
CRIP1	3	1	0.962	0.630221	9.94416e-57	1.96964e-52
AC011603.2	3	0.605	0.263	0.381778	1.10241e-56	2.18354e-52
ARL3	3	0.605	0.256	0.336975	1.38347e-56	2.74025e-52
FXN	3	0.714	0.335	0.337402	1.53477e-56	3.03992e-52
NDUFB3	3	0.987	0.751	0.459184	3.82607e-56	7.5783e-52
ERI1	3	0.803	0.406	0.363565	1.16376e-55	2.30507e-51
TXNDC17	3	0.987	0.742	0.464875	1.67954e-55	3.32666e-51
SEM1	3	0.995	0.885	0.409025	2.76682e-55	5.48025e-51
PGK1	3	0.993	0.887	0.445216	4.45916e-55	8.83226e-51
SPON2	3	0.665	0.301	0.381002	6.57282e-55	1.30188e-50
KRAS	3	0.951	0.649	0.464806	1.39032e-54	2.75382e-50
RUVBL2	3	0.749	0.379	0.334446	4.00008e-54	7.92296e-50
RDH10	3	0.412	0.139	0.296601	4.28459e-54	8.48648e-50
DAD1	3	0.998	0.827	0.452052	5.65057e-54	1.11921e-49
LINC00892	3	0.556	0.226	0.348462	7.00021e-54	1.38653e-49
MCM7	3	0.865	0.453	0.467309	7.722e-54	1.5295e-49
SUB1	3	1	0.977	0.398105	7.92903e-54	1.5705e-49
ITGB1BP1	3	0.907	0.568	0.401186	8.91703e-54	1.7662e-49
GZMH	3	0.585	0.25	0.69746	1.42026e-53	2.81312e-49
RPA2	3	0.887	0.49	0.381151	1.48188e-53	2.93516e-49
DTHD1	3	0.508	0.193	0.279368	1.50978e-53	2.99042e-49
SEPTIN11	3	0.745	0.379	0.36189	1.66009e-53	3.28813e-49
SNRPF	3	0.995	0.837	0.440975	2.15955e-53	4.27742e-49
CD99	3	0.998	0.936	0.451625	2.78876e-53	5.5237e-49
VDAC3	3	0.947	0.661	0.425671	2.83093e-53	5.60723e-49
MCM5	3	0.885	0.463	0.428862	3.3479e-53	6.63119e-49
TK1	3	0.889	0.434	0.378994	3.40291e-53	6.74013e-49
HNRNPD	3	0.995	0.879	0.431825	3.7919e-53	7.51062e-49
CEP55	3	0.619	0.282	0.364271	4.19683e-53	8.31266e-49
EIF5A	3	0.995	0.89	0.472836	7.5698e-53	1.49935e-48
SNRPB	3	0.987	0.855	0.455075	8.52413e-53	1.68837e-48
TUBA1C	3	0.889	0.522	0.470042	9.3618e-53	1.85429e-48
HMMR	3	0.55	0.227	0.344962	1.07801e-52	2.13522e-48
ILF2	3	0.954	0.686	0.441639	2.09455e-52	4.14868e-48
LSM3	3	0.976	0.676	0.433512	2.57516e-52	5.10062e-48
RNASEH2A	3	0.712	0.324	0.272705	2.98124e-52	5.90494e-48
MYCBP	3	0.872	0.493	0.363631	4.26991e-52	8.45742e-48
PLPBP	3	0.761	0.386	0.288738	5.51249e-52	1.09186e-47
NUP37	3	0.745	0.364	0.291257	7.88448e-52	1.56168e-47
TUBB4B	3	0.92	0.629	0.612897	8.67731e-52	1.71872e-47
CANX	3	0.964	0.69	0.459084	1.03446e-51	2.04896e-47
EIF2S1	3	0.845	0.465	0.35233	1.26261e-51	2.50085e-47
RPS26	3	1	0.995	0.318925	1.70635e-51	3.37976e-47
PSMA3	3	0.982	0.738	0.440828	3.07878e-51	6.09815e-47
ANXA1	3	0.936	0.639	0.696564	3.58488e-51	7.10057e-47
CKS1B	3	0.789	0.379	0.332986	4.4208e-51	8.75628e-47
PSMA6	3	0.993	0.848	0.420339	4.78245e-51	9.47259e-47
BOLA3	3	0.893	0.552	0.404331	5.22792e-51	1.03549e-46
YWHAE	3	0.973	0.745	0.443812	6.56802e-51	1.30093e-46
STIP1	3	0.825	0.461	0.369425	6.85031e-51	1.35684e-46
BST2	3	0.998	0.82	0.455893	1.52027e-50	3.01119e-46
EXOSC8	3	0.805	0.446	0.376793	1.964e-50	3.89009e-46
TYMS	3	0.914	0.441	0.407911	2.6143e-50	5.17814e-46
PCLAF	3	0.958	0.579	0.487181	4.91417e-50	9.7335e-46
TRMT112	3	0.993	0.821	0.417412	5.596e-50	1.1084e-45
GINS2	3	0.75	0.362	0.365252	6.07515e-50	1.20331e-45
SRI	3	0.96	0.702	0.430424	6.72003e-50	1.33104e-45
ATP5MF	3	0.998	0.935	0.37069	1.36043e-49	2.69461e-45
LAG3	3	0.907	0.546	0.454045	1.44157e-49	2.85531e-45
NUDT1	3	0.969	0.593	0.419548	1.90163e-49	3.76656e-45
RRM2	3	0.902	0.417	0.287071	2.66444e-49	5.27746e-45
DTL	3	0.672	0.325	0.380489	3.3938e-49	6.72211e-45
MRPL27	3	0.867	0.491	0.349113	4.54895e-49	9.01011e-45
IMPDH2	3	0.798	0.451	0.422507	4.93077e-49	9.76637e-45
P4HB	3	0.967	0.712	0.412977	8.04767e-49	1.594e-44
ZNF706	3	0.962	0.665	0.43761	8.37266e-49	1.65837e-44
CLSPN	3	0.781	0.386	0.40386	9.17187e-49	1.81667e-44
RPS27L	3	0.991	0.802	0.495467	1.05472e-48	2.08908e-44
PNP	3	0.785	0.4	0.291874	1.55923e-48	3.08837e-44
SNRNP25	3	0.778	0.418	0.337379	2.51215e-48	4.97582e-44
PDIA4	3	0.756	0.394	0.311313	3.75506e-48	7.43765e-44
ABRACL	3	0.993	0.852	0.433293	4.86536e-48	9.63681e-44
SNRPD1	3	0.974	0.78	0.435948	4.96377e-48	9.83175e-44
TPM4	3	0.989	0.834	0.467679	5.14475e-48	1.01902e-43
PCNA	3	0.902	0.489	0.402329	9.76708e-48	1.93457e-43
C11orf98	3	0.936	0.615	0.377934	1.29115e-47	2.55738e-43
CEBPD	3	0.601	0.273	0.404319	1.76789e-47	3.50166e-43
HAVCR2	3	0.74	0.36	0.292405	2.13815e-47	4.23503e-43
UQCRQ	3	1	0.87	0.38985	2.57929e-47	5.10881e-43
DBI	3	0.993	0.904	0.380908	2.63425e-47	5.21766e-43
S100A6	3	1	0.987	0.433063	2.74733e-47	5.44164e-43
PRDX5	3	0.984	0.773	0.414597	3.65386e-47	7.2372e-43
CENPF	3	0.821	0.424	0.338399	3.78713e-47	7.50116e-43
IGKV3OR2-268	3	0.474	0.187	0.273981	4.86017e-47	9.62653e-43
ACAT1	3	0.785	0.422	0.315838	4.96229e-47	9.82881e-43
F2R	3	0.767	0.383	0.339059	5.48454e-47	1.08632e-42
LRRC59	3	0.811	0.443	0.32714	6.78687e-47	1.34427e-42
SLC9A3R1	3	0.993	0.79	0.430449	6.95038e-47	1.37666e-42
AL138720.1	3	0.536	0.225	0.260795	9.57546e-47	1.89661e-42
PPIF	3	0.823	0.443	0.326526	9.64097e-47	1.90959e-42
LYAR	3	0.925	0.574	0.435091	1.18101e-46	2.33923e-42
MRPL3	3	0.887	0.554	0.384045	1.88922e-46	3.74198e-42
CDK2AP1	3	0.732	0.384	0.325809	2.00174e-46	3.96485e-42
MCM6	3	0.827	0.477	0.382374	2.29304e-46	4.54182e-42
CCT4	3	0.974	0.764	0.415099	2.90507e-46	5.75407e-42
HACD3	3	0.789	0.428	0.318537	3.5277e-46	6.98732e-42
ARHGDIA	3	0.993	0.871	0.370653	3.86086e-46	7.6472e-42
CD70	3	0.641	0.293	0.332932	5.80534e-46	1.14986e-41
THOC3	3	0.885	0.525	0.330623	6.46568e-46	1.28066e-41
CX3CR1	3	0.392	0.14	0.344918	8.52696e-46	1.68893e-41
HSPA5	3	0.962	0.75	0.456185	1.07695e-45	2.13312e-41
TIMM10	3	0.798	0.436	0.326148	1.11177e-45	2.20208e-41
DDX39A	3	0.933	0.649	0.422519	1.11338e-45	2.20527e-41
H2AFV	3	0.998	0.911	0.424318	1.40127e-45	2.77549e-41
MKI67	3	0.945	0.517	0.323094	1.56746e-45	3.10467e-41
MCUR1	3	0.741	0.396	0.31839	2.00094e-45	3.96326e-41
RFC4	3	0.736	0.371	0.303933	2.22583e-45	4.40871e-41
POP7	3	0.776	0.409	0.275276	2.28076e-45	4.51751e-41
SSRP1	3	0.86	0.513	0.372946	2.29625e-45	4.54819e-41
NAA38	3	0.969	0.736	0.409856	2.44984e-45	4.8524e-41
DNAJC9	3	0.893	0.492	0.36369	2.5017e-45	4.95512e-41
YBX1	3	1	0.957	0.39171	3.12346e-45	6.18664e-41
DANCR	3	0.732	0.388	0.340442	3.25029e-45	6.43784e-41
RPL22L1	3	0.969	0.791	0.553762	3.54363e-45	7.01886e-41
DCUN1D5	3	0.829	0.466	0.292704	4.33689e-45	8.59007e-41
TALDO1	3	0.985	0.758	0.38539	4.90909e-45	9.72344e-41
UBE2E3	3	0.827	0.461	0.326111	5.79431e-45	1.14768e-40
CIAO2B	3	0.976	0.784	0.363551	9.00333e-45	1.78329e-40
OSTC	3	0.944	0.669	0.377482	9.78098e-45	1.93732e-40
NCAPD2	3	0.791	0.428	0.324225	9.90101e-45	1.96109e-40
CCT2	3	0.936	0.667	0.462898	1.04344e-44	2.06675e-40
NHP2	3	0.942	0.654	0.414533	1.14409e-44	2.2661e-40
MAD2L1	3	0.749	0.373	0.31749	1.17409e-44	2.32553e-40
CFL1	3	1	0.994	0.323621	2.53407e-44	5.01923e-40
TARS	3	0.721	0.366	0.262281	2.61382e-44	5.1772e-40
MRPL17	3	0.632	0.301	0.252575	3.33325e-44	6.60217e-40
CD38	3	0.951	0.616	0.381277	3.83772e-44	7.60137e-40
GLRX5	3	0.929	0.64	0.373047	5.93146e-44	1.17485e-39
MRPL36	3	0.785	0.418	0.275655	8.01839e-44	1.5882e-39
NASP	3	0.96	0.698	0.448419	1.56477e-43	3.09934e-39
COA4	3	0.769	0.42	0.292129	2.12681e-43	4.21258e-39
BAK1	3	0.796	0.46	0.34373	2.23525e-43	4.42736e-39
CDCA7	3	0.723	0.389	0.384556	2.76979e-43	5.48613e-39
ATP5F1B	3	0.995	0.939	0.355374	2.85807e-43	5.66098e-39
UQCC2	3	0.858	0.493	0.318706	3.15789e-43	6.25483e-39
PPIH	3	0.882	0.514	0.326657	3.30553e-43	6.54726e-39
UHRF1	3	0.648	0.308	0.280861	4.5291e-43	8.97078e-39
PGD	3	0.67	0.337	0.260295	8.89935e-43	1.76269e-38
HNRNPAB	3	0.902	0.578	0.437561	1.98028e-42	3.92233e-38
MYBL2	3	0.712	0.342	0.295023	2.82049e-42	5.58655e-38
PKM	3	0.982	0.821	0.451146	3.78649e-42	7.4999e-38
ALDOA	3	0.998	0.921	0.370427	4.9503e-42	9.80506e-38
TRBV2	3	0.546	0.233	0.697705	5.05605e-42	1.00145e-37
CHEK1	3	0.696	0.352	0.27568	5.77777e-42	1.1444e-37
CYC1	3	0.94	0.649	0.38124	8.79992e-42	1.743e-37
SMC2	3	0.801	0.398	0.284977	9.04832e-42	1.7922e-37
CD59	3	0.969	0.737	0.447492	1.4467e-41	2.86548e-37
PHB	3	0.867	0.541	0.362169	1.59819e-41	3.16553e-37
PCMT1	3	0.883	0.547	0.322377	1.66294e-41	3.29379e-37
MAGOHB	3	0.636	0.313	0.250752	1.71096e-41	3.38889e-37
NDUFV2	3	0.998	0.88	0.368635	2.33365e-41	4.62227e-37
HAT1	3	0.874	0.515	0.347481	2.87775e-41	5.69996e-37
ATP5MD	3	0.998	0.916	0.333924	3.07838e-41	6.09735e-37
ANP32A	3	0.965	0.761	0.383916	3.26403e-41	6.46507e-37
PSMB9	3	0.998	0.939	0.345968	3.28799e-41	6.51253e-37
CCT3	3	0.933	0.68	0.407884	4.44311e-41	8.80046e-37
POLR2E	3	0.956	0.684	0.365819	4.66505e-41	9.24007e-37
UCHL5	3	0.743	0.392	0.266801	4.80977e-41	9.52671e-37
PSMB6	3	0.995	0.85	0.357041	5.28506e-41	1.04681e-36
TRAV13-1	3	0.545	0.255	0.689404	5.31395e-41	1.05253e-36
CXCR3	3	0.94	0.608	0.399931	5.47617e-41	1.08467e-36
EIF4A1	3	0.996	0.943	0.405268	5.61876e-41	1.11291e-36
GPI	3	0.969	0.722	0.384035	7.81669e-41	1.54825e-36
NDUFA6	3	0.991	0.843	0.35737	9.3479e-41	1.85154e-36
PDCD5	3	0.973	0.756	0.378015	9.49555e-41	1.88078e-36
MRPS18C	3	0.902	0.558	0.323126	1.11171e-40	2.20197e-36
LGALS3	3	0.905	0.59	0.499777	1.13579e-40	2.24965e-36
GGCT	3	0.858	0.506	0.328018	1.24702e-40	2.46997e-36
CD320	3	0.75	0.41	0.313241	1.40235e-40	2.77764e-36
UBL5	3	1	0.955	0.311594	1.44091e-40	2.85401e-36
LBR	3	0.953	0.701	0.378452	1.73675e-40	3.43999e-36
HDGF	3	0.938	0.63	0.36722	2.03145e-40	4.0237e-36
PSMD2	3	0.893	0.573	0.35551	2.45645e-40	4.86548e-36
MT-ND4	3	0.998	0.978	0.365015	2.71493e-40	5.37745e-36
PSMD1	3	0.883	0.576	0.350104	2.73278e-40	5.41281e-36
SMS	3	0.893	0.584	0.349649	3.50718e-40	6.94666e-36
DUT	3	0.98	0.738	0.421755	4.00596e-40	7.9346e-36
NDUFB6	3	0.962	0.697	0.376675	8.64204e-40	1.71173e-35
LRMP	3	0.743	0.411	0.325087	1.11994e-39	2.21827e-35
HAX1	3	0.898	0.576	0.318558	1.39695e-39	2.76694e-35
DCXR	3	0.96	0.646	0.335707	1.49565e-39	2.96244e-35
CCT7	3	0.927	0.647	0.379535	1.59849e-39	3.16613e-35
MYL6	3	1	0.996	0.306313	1.61986e-39	3.20845e-35
ELOC	3	0.976	0.781	0.355188	1.82967e-39	3.62403e-35
SLC25A5	3	1	0.92	0.395342	2.53036e-39	5.01188e-35
POMP	3	0.996	0.898	0.333503	3.66162e-39	7.25257e-35
PPP1R14B	3	0.761	0.461	0.415266	4.45775e-39	8.82948e-35
PSMB8	3	1	0.925	0.340277	6.25653e-39	1.23923e-34
CDT1	3	0.78	0.399	0.256159	6.32955e-39	1.25369e-34
AHCY	3	0.752	0.412	0.290571	6.63539e-39	1.31427e-34
ANXA5	3	0.989	0.807	0.404916	1.07776e-38	2.13472e-34
KPNB1	3	0.949	0.712	0.388941	1.27506e-38	2.52552e-34
NDUFC2	3	0.991	0.887	0.340385	1.4205e-38	2.81359e-34
CBX1	3	0.685	0.364	0.266797	1.44898e-38	2.86999e-34
XRCC6	3	0.984	0.81	0.347766	2.36561e-38	4.68557e-34
LMNB1	3	0.896	0.575	0.394299	2.87546e-38	5.69542e-34
XBP1	3	0.88	0.539	0.322599	2.98883e-38	5.91998e-34
NUTF2	3	0.965	0.718	0.346743	3.19746e-38	6.33322e-34
HELLS	3	0.803	0.459	0.311679	4.49373e-38	8.90073e-34
MLEC	3	0.871	0.522	0.29798	5.53324e-38	1.09597e-33
EIF2S2	3	0.971	0.793	0.376409	5.93498e-38	1.17554e-33
EFHD2	3	0.978	0.741	0.380708	6.15529e-38	1.21918e-33
PHPT1	3	0.909	0.602	0.332745	6.53761e-38	1.2949e-33
APOBEC3G	3	0.876	0.541	0.340053	6.64762e-38	1.31669e-33
HNRNPF	3	0.987	0.82	0.37234	7.98755e-38	1.58209e-33
PARK7	3	0.995	0.899	0.312216	7.99422e-38	1.58342e-33
PPP1CA	3	0.998	0.942	0.322506	8.10732e-38	1.60582e-33
RPL26L1	3	0.856	0.522	0.291682	1.01591e-37	2.01221e-33
UBA1	3	0.896	0.547	0.284601	1.11657e-37	2.2116e-33
PSMB1	3	0.998	0.902	0.327978	1.88912e-37	3.74178e-33
SEC61G	3	0.998	0.922	0.326524	2.16789e-37	4.29394e-33
HSD17B10	3	0.903	0.594	0.334149	2.96578e-37	5.87433e-33
PRKDC	3	0.938	0.646	0.389226	3.29315e-37	6.52275e-33
LGMN	3	0.508	0.242	0.502214	3.81652e-37	7.55938e-33
ATP5F1A	3	0.991	0.857	0.343846	3.84663e-37	7.61901e-33
HNRNPC	3	0.998	0.946	0.313254	4.17886e-37	8.27706e-33
SNRPC	3	0.976	0.778	0.339427	4.33239e-37	8.58117e-33
PAICS	3	0.648	0.366	0.35051	7.61506e-37	1.50832e-32
SELENOH	3	0.987	0.81	0.346385	1.22096e-36	2.41835e-32
MCTS1	3	0.849	0.501	0.275731	1.27024e-36	2.51596e-32
CBX3	3	0.987	0.806	0.356037	1.38048e-36	2.73432e-32
SLC25A3	3	1	0.914	0.330156	2.14571e-36	4.25001e-32
TFDP1	3	0.927	0.619	0.335973	2.60166e-36	5.15311e-32
COX17	3	0.971	0.73	0.343587	3.25293e-36	6.44309e-32
FDPS	3	0.905	0.597	0.334975	3.47988e-36	6.89259e-32
NDUFS6	3	0.987	0.781	0.342312	3.56219e-36	7.05562e-32
THSD4-AS1	3	0.778	0.439	0.263388	4.10794e-36	8.13659e-32
RECQL	3	0.9	0.575	0.322383	6.27089e-36	1.24207e-31
HIGD1A	3	0.887	0.578	0.298615	7.17555e-36	1.42126e-31
PSMD11	3	0.869	0.564	0.307695	8.99489e-36	1.78162e-31
HNRNPR	3	0.984	0.818	0.341848	9.75536e-36	1.93224e-31
MCMBP	3	0.721	0.403	0.278155	1.19916e-35	2.37517e-31
CCNA2	3	0.607	0.292	0.267442	1.50101e-35	2.97306e-31
RAB29	3	0.847	0.53	0.309488	1.72331e-35	3.41336e-31
TRAV38-1	3	0.444	0.187	0.280315	1.87816e-35	3.72007e-31
NAE1	3	0.77	0.438	0.253596	1.87918e-35	3.72208e-31
APOBEC3C	3	0.914	0.593	0.309111	3.38985e-35	6.71428e-31
SNRNP40	3	0.803	0.469	0.284921	4.30764e-35	8.53215e-31
ERH	3	0.991	0.855	0.345081	4.67253e-35	9.25488e-31
COX7A2	3	0.998	0.96	0.282773	5.0125e-35	9.92826e-31
NME2	3	0.998	0.932	0.386589	5.63335e-35	1.1158e-30
MCM3	3	0.812	0.453	0.284369	7.14538e-35	1.41529e-30
HOPX	3	0.412	0.177	0.386387	7.64779e-35	1.5148e-30
GMNN	3	0.765	0.42	0.277016	8.7774e-35	1.73854e-30
FAM136A	3	0.805	0.472	0.259484	1.44718e-34	2.86642e-30
NABP2	3	0.78	0.446	0.251026	1.67391e-34	3.31551e-30
MRPS12	3	0.856	0.547	0.297856	2.01519e-34	3.99149e-30
RBX1	3	0.984	0.86	0.316898	2.39228e-34	4.73839e-30
LSM7	3	0.995	0.849	0.348371	2.64189e-34	5.23278e-30
BLVRA	3	0.823	0.505	0.323319	3.36537e-34	6.6658e-30
PTMA	3	1	0.998	0.3118	5.42203e-34	1.07394e-29
PFDN6	3	0.812	0.47	0.250218	7.76466e-34	1.53795e-29
POLR2F	3	0.911	0.622	0.297351	8.48302e-34	1.68023e-29
TOMM6	3	0.995	0.793	0.338543	1.0106e-33	2.0017e-29
CHCHD1	3	0.88	0.533	0.266855	1.69531e-33	3.35789e-29
MRPL16	3	0.885	0.555	0.281555	2.88142e-33	5.70722e-29
ITGAE	3	0.805	0.498	0.270097	3.13155e-33	6.20266e-29
MRPS33	3	0.794	0.486	0.271923	3.60197e-33	7.13442e-29
SMC1A	3	0.891	0.572	0.33147	3.86081e-33	7.64711e-29
ANP32B	3	0.998	0.921	0.331689	3.90921e-33	7.74296e-29
MRPL41	3	0.973	0.759	0.327636	4.88101e-33	9.66781e-29
PWP1	3	0.854	0.554	0.280725	5.93464e-33	1.17547e-28
DHFR	3	0.787	0.444	0.307958	7.26167e-33	1.43832e-28
COPB2	3	0.816	0.485	0.252852	1.06956e-32	2.11847e-28
MTCH2	3	0.885	0.583	0.307681	1.18714e-32	2.35137e-28
UQCR10	3	0.998	0.925	0.274345	1.43713e-32	2.84653e-28
NUDCD2	3	0.827	0.529	0.283921	1.48647e-32	2.94425e-28
PRKCQ-AS1	3	0.845	0.522	0.293222	2.41262e-32	4.77867e-28
MICOS10	3	0.996	0.851	0.314598	2.49778e-32	4.94736e-28
CBX5	3	0.842	0.472	0.251637	3.11615e-32	6.17216e-28
GZMA	3	0.809	0.468	0.348432	3.9665e-32	7.85644e-28
ARPC1B	3	1	0.982	0.27789	4.16052e-32	8.24075e-28
RPA1	3	0.807	0.497	0.267441	4.73623e-32	9.38105e-28
HSPB11	3	0.925	0.637	0.323768	4.82288e-32	9.55267e-28
SPN	3	0.927	0.633	0.30615	4.86647e-32	9.63902e-28
SMC4	3	0.913	0.591	0.315972	5.19255e-32	1.02849e-27
SNHG3	3	0.701	0.402	0.284931	5.63532e-32	1.11619e-27
SKA2	3	0.893	0.555	0.278759	6.47389e-32	1.28228e-27
UPF3A	3	0.913	0.603	0.281236	7.11812e-32	1.40989e-27
DEK	3	0.991	0.849	0.358682	8.03762e-32	1.59201e-27
WDR1	3	0.995	0.851	0.309723	8.31823e-32	1.64759e-27
PSMC2	3	0.834	0.535	0.271109	8.32558e-32	1.64905e-27
PDAP1	3	0.929	0.642	0.319975	8.81986e-32	1.74695e-27
AKR1B1	3	0.831	0.495	0.259186	9.5972e-32	1.90092e-27
DNMT1	3	0.922	0.631	0.319651	1.00333e-31	1.9873e-27
PSMD8	3	0.987	0.85	0.297415	1.04893e-31	2.07762e-27
HSPH1	3	0.847	0.548	0.306247	1.26567e-31	2.50691e-27
GALM	3	0.942	0.693	0.304816	1.32726e-31	2.62891e-27
ZNRD1	3	0.887	0.557	0.270807	1.36905e-31	2.71167e-27
EEF1E1	3	0.789	0.476	0.25619	2.34651e-31	4.64773e-27
STOML2	3	0.905	0.619	0.300893	2.53789e-31	5.0268e-27
RPN2	3	0.947	0.703	0.306047	3.7797e-31	7.48644e-27
TIMM8B	3	0.922	0.627	0.295886	3.94005e-31	7.80406e-27
MDH1	3	0.954	0.704	0.30931	3.99907e-31	7.92097e-27
LSM2	3	0.945	0.67	0.313577	4.08114e-31	8.08351e-27
NDUFB2	3	0.993	0.861	0.307243	4.5328e-31	8.97812e-27
PRMT1	3	0.803	0.499	0.284342	4.94831e-31	9.80111e-27
EPRS	3	0.845	0.542	0.287988	5.9599e-31	1.18048e-26
HMGA1	3	0.931	0.652	0.396798	6.52689e-31	1.29278e-26
SRP9	3	0.984	0.837	0.312392	6.75914e-31	1.33878e-26
CISD3	3	0.843	0.539	0.27799	6.90616e-31	1.3679e-26
TXN2	3	0.922	0.656	0.284294	9.12866e-31	1.80811e-26
SDHD	3	0.936	0.666	0.279879	9.15634e-31	1.8136e-26
TMEM160	3	0.96	0.69	0.30398	9.5164e-31	1.88491e-26
KRTCAP2	3	0.996	0.893	0.300944	1.13893e-30	2.25589e-26
RTCA	3	0.838	0.524	0.250875	1.32734e-30	2.62907e-26
COX7B	3	0.998	0.914	0.273011	1.62184e-30	3.21237e-26
RPS19BP1	3	0.944	0.692	0.300352	1.68716e-30	3.34176e-26
TMEM167A	3	0.913	0.631	0.272799	2.58927e-30	5.12857e-26
ANAPC15	3	0.905	0.597	0.27563	2.64797e-30	5.24484e-26
SNRPD2	3	0.998	0.956	0.273156	2.75122e-30	5.44933e-26
HNRNPM	3	0.976	0.785	0.331918	2.98707e-30	5.91649e-26
VASP	3	0.889	0.565	0.272157	3.62313e-30	7.17634e-26
MYDGF	3	0.918	0.642	0.271348	3.85626e-30	7.6381e-26
PHB2	3	0.973	0.799	0.301225	4.12587e-30	8.17211e-26
AURKAIP1	3	0.987	0.821	0.291281	4.73766e-30	9.38388e-26
RPLP0	3	1	0.994	0.284885	4.91064e-30	9.72651e-26
TOPBP1	3	0.821	0.507	0.269974	4.97434e-30	9.85267e-26
UBE2S	3	0.909	0.642	0.392124	5.85088e-30	1.15888e-25
SRSF9	3	0.991	0.852	0.287746	6.51032e-30	1.2895e-25
MRPS16	3	0.851	0.528	0.255007	6.64142e-30	1.31547e-25
COX5A	3	0.996	0.937	0.276058	7.61541e-30	1.50839e-25
LRRFIP1	3	0.998	0.927	0.283814	8.89935e-30	1.76269e-25
FKBP3	3	0.9	0.61	0.310215	1.56579e-29	3.10135e-25
EIF4G1	3	0.801	0.495	0.252516	1.67573e-29	3.31913e-25
PSMC5	3	0.973	0.756	0.299151	1.72055e-29	3.4079e-25
RAB5IF	3	0.954	0.737	0.30901	1.73321e-29	3.43297e-25
ACP1	3	0.951	0.712	0.284099	2.56054e-29	5.07166e-25
PPA1	3	0.944	0.743	0.353201	2.58822e-29	5.12649e-25
ATP5PF	3	0.982	0.835	0.332201	3.52103e-29	6.97411e-25
ATP5MC1	3	0.876	0.584	0.316915	3.55411e-29	7.03962e-25
SNRPD3	3	0.969	0.719	0.314811	3.71015e-29	7.34869e-25
SEC13	3	0.889	0.577	0.256429	4.26285e-29	8.44342e-25
MMADHC	3	0.964	0.745	0.279755	4.59275e-29	9.09687e-25
CCND3	3	0.971	0.774	0.324704	5.61711e-29	1.11258e-24
DCTN3	3	0.982	0.787	0.29842	6.25731e-29	1.23939e-24
SNRPA	3	0.922	0.655	0.29465	6.37157e-29	1.26202e-24
CDC123	3	0.896	0.619	0.267394	8.89183e-29	1.76121e-24
IKZF3	3	0.902	0.616	0.297291	9.21914e-29	1.82603e-24
RBBP7	3	0.894	0.608	0.311501	1.08373e-28	2.14655e-24
ASPM	3	0.565	0.288	0.266041	1.08498e-28	2.14902e-24
CKLF	3	0.984	0.8	0.308384	1.27862e-28	2.53256e-24
SSBP1	3	0.971	0.774	0.287514	1.29611e-28	2.5672e-24
S100A10	3	1	0.974	0.335073	1.41223e-28	2.7972e-24
SEC11A	3	0.991	0.831	0.284738	2.03494e-28	4.0306e-24
LIMS1	3	0.987	0.813	0.339039	2.22904e-28	4.41506e-24
SYNCRIP	3	0.913	0.648	0.297987	3.12619e-28	6.19204e-24
OXCT1	3	0.905	0.616	0.28488	3.77435e-28	7.47585e-24
LCP1	3	0.996	0.937	0.288322	5.81158e-28	1.1511e-23
SLBP	3	0.902	0.663	0.355011	6.13159e-28	1.21448e-23
ROMO1	3	0.996	0.87	0.296997	6.29037e-28	1.24593e-23
PEBP1	3	0.947	0.759	0.316649	6.90509e-28	1.36769e-23
HNRNPA3	3	0.998	0.925	0.305806	6.95693e-28	1.37796e-23
EIF5B	3	0.918	0.642	0.285115	7.99147e-28	1.58287e-23
SEC61B	3	0.993	0.923	0.256313	8.59002e-28	1.70143e-23
TMEM258	3	0.998	0.929	0.268558	8.59398e-28	1.70221e-23
UBE2N	3	0.985	0.799	0.267344	9.80412e-28	1.9419e-23
HDAC1	3	0.951	0.711	0.288824	1.48593e-27	2.94318e-23
NCL	3	0.995	0.905	0.36707	2.29839e-27	4.55241e-23
PSMD9	3	0.936	0.687	0.274663	2.74251e-27	5.43209e-23
PARP1	3	0.974	0.792	0.297504	3.15259e-27	6.24434e-23
ENY2	3	0.936	0.667	0.271844	4.11423e-27	8.14906e-23
NDUFB7	3	0.984	0.802	0.268859	4.69274e-27	9.29491e-23
NUDC	3	0.871	0.577	0.282493	4.81309e-27	9.53329e-23
HNRNPU	3	0.998	0.922	0.295947	5.10675e-27	1.01149e-22
MRPL4	3	0.832	0.546	0.267707	6.31835e-27	1.25148e-22
RAP1B	3	0.993	0.931	0.291972	8.11452e-27	1.60724e-22
HSPB1	3	0.86	0.599	0.298781	1.04382e-26	2.06749e-22
UQCRC1	3	0.916	0.67	0.273236	1.5293e-26	3.02909e-22
C1QBP	3	0.944	0.741	0.371857	2.02728e-26	4.01544e-22
SSB	3	0.898	0.643	0.295543	2.33961e-26	4.63407e-22
UQCRH	3	1	0.928	0.267265	2.45006e-26	4.85284e-22
XRCC5	3	0.984	0.831	0.302551	2.54007e-26	5.03112e-22
RAD21	3	0.974	0.833	0.309457	2.56491e-26	5.08032e-22
ADRM1	3	0.958	0.707	0.264094	3.54007e-26	7.01182e-22
NDUFAB1	3	0.96	0.765	0.286517	4.56838e-26	9.04858e-22
SUCLG1	3	0.925	0.627	0.251943	5.05852e-26	1.00194e-21
CLTA	3	0.971	0.787	0.272303	5.59338e-26	1.10788e-21
LMAN2	3	0.947	0.721	0.26905	7.59552e-26	1.50444e-21
PRR13	3	0.996	0.903	0.252235	9.77424e-26	1.93598e-21
TXNL4A	3	0.978	0.818	0.270115	1.09558e-25	2.17001e-21
MRPS34	3	0.913	0.668	0.29073	1.59367e-25	3.15658e-21
NDUFAF3	3	0.874	0.598	0.269112	1.6998e-25	3.36679e-21
KRT10	3	0.993	0.858	0.279964	1.73222e-25	3.43102e-21
SSR3	3	0.944	0.674	0.272759	1.73755e-25	3.44156e-21
ARL6IP1	3	0.995	0.871	0.310292	1.78838e-25	3.54224e-21
ATOX1	3	0.929	0.639	0.25642	1.85615e-25	3.67649e-21
FBL	3	0.913	0.655	0.305776	1.92865e-25	3.82007e-21
VPS29	3	0.933	0.695	0.282251	2.0733e-25	4.10658e-21
USP1	3	0.885	0.57	0.264591	2.15308e-25	4.2646e-21
DNAJC15	3	0.956	0.714	0.265001	2.5012e-25	4.95412e-21
MT-ATP6	3	0.998	0.982	0.28292	2.80554e-25	5.55692e-21
NOL7	3	0.956	0.758	0.253289	3.52697e-25	6.98588e-21
MT-ND5	3	0.998	0.982	0.271927	1.018e-24	2.01634e-20
AP2S1	3	0.982	0.816	0.267184	1.18792e-24	2.3529e-20
VDAC1	3	0.969	0.765	0.311274	2.23736e-24	4.43154e-20
RBM8A	3	0.989	0.796	0.259053	2.88481e-24	5.71394e-20
ETFA	3	0.874	0.628	0.258727	3.70468e-24	7.33786e-20
ATP5PB	3	0.989	0.847	0.262255	3.8053e-24	7.53717e-20
MRPL52	3	0.976	0.763	0.278985	4.94546e-24	9.79548e-20
TOMM5	3	0.971	0.77	0.269243	6.14221e-24	1.21659e-19
SIVA1	3	0.913	0.629	0.260382	8.77912e-24	1.73888e-19
NDUFB1	3	0.982	0.824	0.273652	1.00006e-23	1.98082e-19
SET	3	0.989	0.906	0.296131	1.42525e-23	2.82299e-19
MT-ATP8	3	0.998	0.996	0.264435	2.10765e-23	4.17463e-19
RASGRP2	3	0.942	0.715	0.273789	2.32249e-23	4.60015e-19
PDIA3	3	0.967	0.813	0.276872	3.76191e-23	7.45122e-19
NDUFB10	3	0.987	0.857	0.251985	4.73798e-23	9.38451e-19
HINT2	3	0.936	0.664	0.269222	7.47104e-23	1.47979e-18
PA2G4	3	0.964	0.776	0.285769	1.16536e-22	2.30823e-18
PRDX2	3	0.98	0.819	0.274878	1.19571e-22	2.36834e-18
NEDD8	3	0.993	0.861	0.255973	1.20977e-22	2.39619e-18
TAGLN2	3	0.998	0.956	0.280366	1.2312e-22	2.43863e-18
SNRPA1	3	0.933	0.679	0.255073	1.41567e-22	2.80401e-18
VIM	3	1	0.968	0.29139	1.59421e-22	3.15766e-18
UFD1	3	0.942	0.678	0.2576	2.43675e-22	4.82646e-18
ITGA4	3	0.967	0.739	0.274951	3.95753e-22	7.83868e-18
COTL1	3	1	0.948	0.26432	7.44789e-22	1.4752e-17
AHNAK	3	0.973	0.781	0.295492	1.41812e-21	2.80887e-17
SELENOW	3	0.967	0.808	0.25999	2.56814e-21	5.08672e-17
BACH2	3	0.882	0.627	0.256769	5.04438e-21	9.99141e-17
C17orf49	3	0.993	0.82	0.251643	2.30845e-20	4.57235e-16
C12orf57	3	0.985	0.839	0.274165	2.36566e-20	4.68567e-16
RPS17	3	0.989	0.934	0.275978	5.1934e-20	1.02866e-15
GZMB	3	0.339	0.168	0.459764	2.06241e-19	4.08502e-15
SRM	3	0.827	0.592	0.283278	6.276e-17	1.24309e-12
NPM1	3	1	0.981	0.252003	1.36309e-12	2.69986e-08
CDK1	1	0.733	0.225	0.765388	1.89997e-173	3.76327e-169
TYMS	1	0.87	0.423	1.05287	6.22272e-148	1.23254e-143
CLSPN	1	0.847	0.35	0.790246	2.92163e-146	5.78688e-142
ASF1B	1	0.78	0.303	0.683303	1.25446e-145	2.48471e-141
RRM2	1	0.856	0.399	1.09651	1.12555e-143	2.22937e-139
UBE2T	1	0.729	0.257	0.54952	4.52857e-143	8.96973e-139
PKMYT1	1	0.717	0.247	0.582883	3.7701e-136	7.46743e-132
HIST1H2AH	1	0.737	0.255	0.743805	1.12198e-134	2.22231e-130
HIST1H3B	1	0.759	0.302	0.912268	1.25959e-132	2.49487e-128
MCM7	1	0.861	0.43	0.849524	1.10903e-130	2.19665e-126
NUSAP1	1	0.816	0.359	0.851538	5.20002e-130	1.02997e-125
ZWINT	1	0.808	0.335	0.599037	2.34309e-128	4.64095e-124
HIST1H3G	1	0.667	0.218	0.667563	5.21859e-128	1.03365e-123
HIST1H4C	1	0.966	0.898	1.4666	7.73961e-126	1.53299e-121
HIST1H2AJ	1	0.779	0.333	0.899436	2.26773e-124	4.49169e-120
PCNA	1	0.864	0.473	0.977006	8.98404e-124	1.77947e-119
CENPU	1	0.782	0.327	0.61377	1.08797e-122	2.15495e-118
NCAPG	1	0.671	0.234	0.524836	6.30257e-122	1.24835e-117
DTL	1	0.746	0.289	0.662771	1.20308e-121	2.38295e-117
MELK	1	0.619	0.199	0.38632	1.17564e-120	2.32859e-116
GINS2	1	0.77	0.336	0.688714	4.12806e-120	8.17645e-116
CDC45	1	0.659	0.235	0.487014	2.07492e-119	4.1098e-115
UBE2C	1	0.663	0.251	1.07817	1.57502e-118	3.11965e-114
MCM4	1	0.808	0.36	0.660852	2.48471e-118	4.92147e-114
FEN1	1	0.782	0.335	0.578871	9.71273e-117	1.9238e-112
UHRF1	1	0.722	0.274	0.540764	1.39555e-116	2.76416e-112
HIST1H1B	1	0.817	0.398	0.848313	3.35877e-116	6.65272e-112
SMC2	1	0.815	0.372	0.58681	5.50821e-116	1.09101e-111
STIL	1	0.623	0.209	0.407359	7.06936e-116	1.40023e-111
RAD51AP1	1	0.655	0.225	0.387366	1.08522e-115	2.14949e-111
HIST1H2AI	1	0.799	0.393	0.94016	9.96761e-114	1.97428e-109
RAD51	1	0.664	0.239	0.425713	2.01429e-111	3.9897e-107
TK1	1	0.84	0.418	0.681561	2.74339e-111	5.43384e-107
FBXO5	1	0.687	0.259	0.504856	2.95227e-111	5.84756e-107
CDCA5	1	0.62	0.211	0.414802	1.15321e-110	2.28416e-106
TUBB	1	0.914	0.728	1.06178	3.01723e-110	5.97624e-106
MCM5	1	0.841	0.448	0.731994	4.44601e-110	8.80621e-106
SKA3	1	0.603	0.204	0.394707	5.39193e-110	1.06798e-105
ORC6	1	0.64	0.228	0.387871	1.2449e-109	2.46577e-105
DNAJC9	1	0.87	0.474	0.64235	5.84671e-109	1.15806e-104
BRCA1	1	0.684	0.257	0.416758	1.61839e-108	3.20555e-104
CENPP	1	0.766	0.341	0.53618	2.64438e-107	5.23772e-103
PCLAF	1	0.885	0.573	0.783762	3.68794e-107	7.3047e-103
TUBA1B	1	0.913	0.712	1.10488	1.18305e-106	2.34326e-102
CHEK1	1	0.75	0.321	0.497706	3.62528e-106	7.1806e-102
NCAPH	1	0.687	0.262	0.441955	4.86351e-106	9.63315e-102
CCNA2	1	0.672	0.26	0.571594	1.34682e-105	2.66765e-101
MCM10	1	0.581	0.195	0.389468	2.02152e-105	4.00403e-101
TOP2A	1	0.749	0.344	0.914556	4.94828e-105	9.80105e-101
MAD2L1	1	0.762	0.348	0.546908	2.00002e-104	3.96143e-100
MYBL2	1	0.745	0.314	0.543303	4.44905e-104	8.81223e-100
DUT	1	0.917	0.738	0.831122	5.12121e-103	1.01436e-98
CENPW	1	0.799	0.374	0.52267	1.18041e-102	2.33804e-98
WDR34	1	0.673	0.272	0.425713	2.39013e-102	4.73413e-98
HIST1H2AM	1	0.88	0.606	0.94592	3.24305e-102	6.42351e-98
CKS1B	1	0.761	0.361	0.660549	4.07828e-102	8.07785e-98
KIF11	1	0.725	0.308	0.528472	8.50438e-102	1.68446e-97
SHCBP1	1	0.628	0.232	0.40677	1.96262e-101	3.88736e-97
CDT1	1	0.803	0.372	0.563777	2.49018e-101	4.93229e-97
H2AFZ	1	0.952	0.867	0.85439	8.37027e-101	1.6579e-96
HIST1H3C	1	0.667	0.262	0.615556	8.65646e-101	1.71459e-96
ANLN	1	0.529	0.163	0.299838	1.21532e-99	2.40719e-95
KIFC1	1	0.594	0.218	0.434879	3.55923e-99	7.04977e-95
POLQ	1	0.579	0.201	0.371033	6.29315e-99	1.24648e-94
MTFR2	1	0.515	0.161	0.294225	1.28918e-98	2.55348e-94
MCM3	1	0.827	0.429	0.629689	2.54134e-98	5.03362e-94
HJURP	1	0.495	0.146	0.346879	1.72525e-97	3.41719e-93
TCF19	1	0.583	0.205	0.324149	2.33576e-97	4.62644e-93
TMEM106C	1	0.778	0.359	0.491159	2.84986e-97	5.64472e-93
CDCA8	1	0.598	0.223	0.530783	9.00965e-97	1.78454e-92
DIAPH3	1	0.616	0.222	0.400019	1.74215e-96	3.45068e-92
HIST1H3F	1	0.606	0.213	0.319952	1.92833e-96	3.81944e-92
STMN1	1	0.903	0.603	0.846249	1.99927e-96	3.95995e-92
ALYREF	1	0.931	0.758	0.653232	3.97287e-96	7.86906e-92
CDCA2	1	0.519	0.168	0.405849	4.33193e-96	8.58026e-92
HIST1H2AL	1	0.688	0.285	0.541395	1.04273e-95	2.06534e-91
SPC25	1	0.552	0.186	0.35237	1.11791e-95	2.21424e-91
CKS2	1	0.819	0.46	0.706392	1.43491e-95	2.84212e-91
ATAD5	1	0.731	0.308	0.433283	1.50212e-95	2.97525e-91
DHFR	1	0.819	0.418	0.552452	3.29765e-95	6.53166e-91
H2AFX	1	0.804	0.432	0.684941	4.58562e-95	9.08273e-91
TMPO	1	0.901	0.608	0.667064	3.85392e-94	7.63346e-90
CENPN	1	0.779	0.371	0.474183	1.79729e-93	3.55989e-89
RRM1	1	0.877	0.524	0.565573	1.11351e-91	2.20553e-87
RANBP1	1	0.901	0.648	0.675125	1.14262e-91	2.2632e-87
ECT2	1	0.536	0.186	0.369564	1.24172e-90	2.45947e-86
SMC4	1	0.889	0.577	0.686777	2.38408e-90	4.72214e-86
SIVA1	1	0.892	0.617	0.585368	4.12327e-90	8.16695e-86
ESCO2	1	0.505	0.158	0.28061	9.83417e-90	1.94785e-85
DEK	1	0.954	0.849	0.623661	2.81776e-89	5.58114e-85
FANCI	1	0.753	0.335	0.402675	1.19234e-88	2.36166e-84
RNASEH2A	1	0.692	0.306	0.398493	3.63664e-88	7.20309e-84
ATAD2	1	0.82	0.441	0.591946	6.82764e-88	1.35235e-83
CDCA4	1	0.705	0.314	0.41778	2.5193e-87	4.98997e-83
USP1	1	0.884	0.553	0.566077	5.97921e-87	1.1843e-82
HIST1H2AG	1	0.722	0.332	0.592816	7.03606e-87	1.39363e-82
CDC6	1	0.589	0.224	0.345972	1.00602e-86	1.99262e-82
LRR1	1	0.713	0.319	0.387782	1.53723e-86	3.0448e-82
MCM2	1	0.713	0.323	0.48642	1.8045e-86	3.57417e-82
CDK4	1	0.775	0.387	0.451724	2.25948e-86	4.47535e-82
RFC4	1	0.743	0.348	0.441215	2.93854e-86	5.82036e-82
KNL1	1	0.724	0.323	0.458174	3.38631e-86	6.70726e-82
KIF23	1	0.516	0.177	0.367572	4.66598e-86	9.24191e-82
ZNF367	1	0.591	0.229	0.397277	9.34998e-86	1.85195e-81
NDC80	1	0.673	0.298	0.451563	1.85056e-85	3.66541e-81
NASP	1	0.91	0.693	0.64395	4.75584e-85	9.4199e-81
CKAP2L	1	0.484	0.158	0.324809	1.15756e-84	2.29277e-80
SGO1	1	0.581	0.215	0.299542	3.67957e-84	7.28812e-80
E2F1	1	0.585	0.231	0.373581	9.42156e-84	1.86613e-79
GMNN	1	0.784	0.396	0.493425	1.6801e-83	3.32777e-79
FAM111B	1	0.533	0.189	0.330998	1.91902e-83	3.801e-79
MKI67	1	0.87	0.508	0.727289	5.75153e-83	1.13921e-78
DNMT1	1	0.897	0.619	0.577493	1.67511e-82	3.3179e-78
HNRNPAB	1	0.874	0.565	0.603748	2.43048e-82	4.81406e-78
TPI1	1	0.946	0.877	0.626652	5.40849e-82	1.07126e-77
CENPM	1	0.853	0.505	0.534202	1.08241e-81	2.14393e-77
LSM4	1	0.898	0.642	0.571484	4.04458e-81	8.0111e-77
SKA1	1	0.536	0.195	0.293872	1.28884e-80	2.5528e-76
DTYMK	1	0.776	0.393	0.443809	2.91559e-80	5.77491e-76
GAPDH	1	1	0.998	0.495518	4.97269e-80	9.84941e-76
CHAF1A	1	0.71	0.334	0.416195	6.37679e-80	1.26305e-75
TTK	1	0.444	0.143	0.268802	9.31965e-80	1.84594e-75
RPA3	1	0.905	0.682	0.582761	1.97111e-79	3.90418e-75
SNRPB	1	0.946	0.856	0.498191	1.98739e-79	3.93642e-75
RAN	1	0.959	0.887	0.565884	3.31991e-79	6.57575e-75
HIST1H3D	1	0.741	0.396	0.587313	4.03676e-79	7.9956e-75
KIF2C	1	0.521	0.194	0.356673	1.25331e-78	2.48243e-74
EXO1	1	0.492	0.173	0.291293	1.47426e-78	2.92008e-74
KIF15	1	0.542	0.205	0.331204	1.86701e-78	3.69799e-74
MND1	1	0.538	0.202	0.29543	2.43233e-78	4.81771e-74
LIG1	1	0.733	0.335	0.376506	4.49625e-78	8.90573e-74
PRC1	1	0.632	0.262	0.360181	5.62888e-78	1.11491e-73
HELLS	1	0.81	0.438	0.524798	5.67283e-78	1.12362e-73
BRCA2	1	0.661	0.285	0.34885	6.16361e-78	1.22083e-73
NUDT1	1	0.901	0.586	0.502905	1.45785e-77	2.88757e-73
FABP5	1	0.857	0.553	0.642823	2.28198e-77	4.51991e-73
FANCB	1	0.491	0.171	0.255132	2.53402e-77	5.01914e-73
HMGB1	1	0.991	0.989	0.5562	4.20128e-77	8.32148e-73
CDCA7	1	0.731	0.368	0.508256	2.12638e-76	4.21172e-72
PPIA	1	0.997	0.991	0.442862	6.40589e-76	1.26882e-71
PTMA	1	0.999	0.999	0.444095	7.6172e-75	1.50874e-70
HIRIP3	1	0.648	0.281	0.318045	8.9918e-75	1.78101e-70
NCAPG2	1	0.671	0.304	0.368724	1.04865e-74	2.07706e-70
SNRPG	1	0.954	0.88	0.511266	2.27649e-74	4.50905e-70
RFC3	1	0.541	0.209	0.281223	4.26489e-74	8.44747e-70
GTSE1	1	0.553	0.223	0.413317	1.42944e-73	2.83129e-69
BRIP1	1	0.581	0.237	0.342568	6.44353e-73	1.27627e-68
CENPX	1	0.835	0.488	0.48475	9.99612e-73	1.97993e-68
NUF2	1	0.597	0.255	0.350976	4.48314e-72	8.87975e-68
PHF19	1	0.874	0.603	0.54332	1.84801e-71	3.66036e-67
HMGB2	1	0.956	0.856	0.683994	6.40417e-71	1.26847e-66
SAC3D1	1	0.525	0.206	0.289576	7.6441e-71	1.51407e-66
SGO2	1	0.513	0.2	0.352784	1.16723e-70	2.31194e-66
CIT	1	0.497	0.19	0.27704	1.21294e-70	2.40247e-66
MXD3	1	0.439	0.151	0.299147	2.00014e-70	3.96167e-66
KIF22	1	0.783	0.427	0.46393	6.17326e-70	1.22274e-65
H2AFV	1	0.972	0.911	0.477977	1.37964e-69	2.73266e-65
POLD3	1	0.667	0.31	0.342456	2.18435e-69	4.32655e-65
FANCG	1	0.488	0.185	0.2532	2.66891e-69	5.28632e-65
CEP152	1	0.567	0.237	0.301284	6.16212e-69	1.22053e-64
RFC2	1	0.68	0.32	0.333891	9.25362e-69	1.83286e-64
RFC5	1	0.608	0.275	0.327227	1.03814e-68	2.05625e-64
NCAPD3	1	0.729	0.362	0.340362	2.3905e-68	4.73487e-64
VRK1	1	0.765	0.4	0.383404	3.91258e-68	7.74964e-64
SLC43A3	1	0.509	0.199	0.272509	8.51621e-68	1.68681e-63
IFI27L1	1	0.725	0.363	0.35358	1.80822e-67	3.58155e-63
FANCD2	1	0.557	0.227	0.2555	2.52515e-67	5.00156e-63
RAD51C	1	0.706	0.344	0.339484	8.15235e-67	1.61474e-62
RACGAP1	1	0.503	0.198	0.303872	1.22685e-66	2.43001e-62
TUBG1	1	0.583	0.254	0.278293	1.51134e-66	2.99351e-62
LMNB1	1	0.87	0.562	0.466019	1.66811e-66	3.30403e-62
CIP2A	1	0.507	0.199	0.272098	2.07961e-66	4.11908e-62
LINC01572	1	0.45	0.159	0.260382	2.29805e-66	4.55175e-62
CARHSP1	1	0.927	0.721	0.475935	3.01643e-66	5.97465e-62
KPNA2	1	0.733	0.417	0.607258	4.57822e-66	9.06809e-62
POLE2	1	0.513	0.206	0.252491	4.9561e-66	9.81655e-62
HIST1H2BH	1	0.563	0.236	0.310701	5.31854e-66	1.05344e-61
ASPM	1	0.591	0.267	0.525371	7.61369e-66	1.50804e-61
CRIP1	1	0.995	0.961	0.603859	3.19734e-65	6.33298e-61
CHCHD2	1	0.976	0.977	0.387084	5.39265e-65	1.06812e-60
CBX5	1	0.802	0.459	0.400854	5.60572e-65	1.11032e-60
BANF1	1	0.889	0.657	0.487709	5.80782e-65	1.15035e-60
HNRNPF	1	0.946	0.819	0.465174	2.79005e-63	5.52625e-59
EZH2	1	0.823	0.514	0.439463	5.60257e-63	1.1097e-58
WDR76	1	0.622	0.285	0.305197	3.11691e-62	6.17367e-58
SHMT1	1	0.541	0.231	0.276363	3.9424e-62	7.8087e-58
FOXM1	1	0.552	0.24	0.286871	9.31093e-62	1.84422e-57
CENPH	1	0.646	0.299	0.286057	9.52198e-62	1.88602e-57
YWHAQ	1	0.947	0.831	0.470404	2.14322e-61	4.24508e-57
DDX39A	1	0.878	0.644	0.455449	9.04538e-61	1.79162e-56
NSD2	1	0.808	0.478	0.407382	1.57933e-60	3.12818e-56
ACD	1	0.675	0.33	0.286855	2.10946e-60	4.17821e-56
BRI3BP	1	0.56	0.25	0.278498	2.13636e-60	4.23149e-56
TPX2	1	0.679	0.342	0.507791	6.05049e-60	1.19842e-55
EBP	1	0.79	0.461	0.382149	9.12649e-60	1.80768e-55
PRIM1	1	0.573	0.253	0.254507	2.18518e-59	4.32819e-55
TUBB4B	1	0.861	0.625	0.689892	3.97543e-59	7.87414e-55
TIMELESS	1	0.595	0.268	0.264949	8.65413e-59	1.71412e-54
NCAPH2	1	0.57	0.257	0.26627	1.08035e-58	2.13986e-54
PGP	1	0.734	0.394	0.328434	3.14483e-58	6.22897e-54
UNG	1	0.468	0.198	0.331547	4.21434e-58	8.34735e-54
HSP90AA1	1	0.991	0.988	0.397775	4.6823e-58	9.27424e-54
POLR3K	1	0.689	0.35	0.29738	8.13885e-58	1.61206e-53
BCL2L12	1	0.672	0.34	0.323114	1.00609e-57	1.99276e-53
PGAM1	1	0.938	0.87	0.459088	1.33522e-57	2.64467e-53
CENPA	1	0.472	0.195	0.309353	2.09572e-57	4.151e-53
CDKN2C	1	0.492	0.204	0.253814	2.279e-57	4.51401e-53
PAQR4	1	0.475	0.194	0.250197	2.98206e-57	5.90657e-53
HIST1H2BF	1	0.529	0.233	0.402242	8.64478e-57	1.71227e-52
PAICS	1	0.669	0.346	0.363101	1.49058e-56	2.95239e-52
MSH2	1	0.583	0.268	0.268322	1.63778e-56	3.24395e-52
PXMP2	1	0.639	0.309	0.289767	2.25526e-56	4.467e-52
SNRNP25	1	0.749	0.403	0.330495	2.77709e-56	5.50058e-52
C19orf48	1	0.69	0.366	0.334392	3.34165e-56	6.6188e-52
COX8A	1	0.98	0.962	0.374699	4.32005e-56	8.55672e-52
NUCKS1	1	0.929	0.742	0.454696	7.74514e-56	1.53408e-51
GSTP1	1	0.897	0.676	0.536949	9.2759e-56	1.83728e-51
KIF4A	1	0.45	0.183	0.273178	1.18329e-55	2.34374e-51
BIRC5	1	0.731	0.404	0.464705	1.98165e-55	3.92506e-51
PRIM2	1	0.679	0.348	0.330397	2.09229e-55	4.1442e-51
RBBP7	1	0.877	0.595	0.400821	2.399e-55	4.7517e-51
AURKB	1	0.522	0.245	0.381885	2.99549e-55	5.93317e-51
ERH	1	0.935	0.859	0.398563	3.59828e-55	7.12712e-51
AURKA	1	0.415	0.162	0.274788	4.05885e-55	8.03936e-51
HIST1H2AB	1	0.475	0.194	0.281523	4.14232e-55	8.20469e-51
LDHA	1	0.952	0.905	0.44356	1.38554e-54	2.74434e-50
BAZ1B	1	0.819	0.509	0.405533	1.38798e-54	2.74917e-50
DCTPP1	1	0.771	0.452	0.383411	1.50752e-54	2.98595e-50
HADH	1	0.668	0.338	0.292795	1.64338e-54	3.25505e-50
MAGOHB	1	0.616	0.298	0.268792	1.87907e-54	3.72188e-50
HIST1H2AE	1	0.578	0.275	0.39478	2.08092e-54	4.12169e-50
HSPB11	1	0.876	0.631	0.413081	3.37403e-54	6.68295e-50
CENPE	1	0.59	0.292	0.461931	4.34467e-54	8.6055e-50
SNRPD1	1	0.927	0.779	0.409788	5.63272e-54	1.11567e-49
HIST2H2BF	1	0.499	0.212	0.281943	6.59337e-54	1.30595e-49
CDKN3	1	0.648	0.334	0.390608	1.16587e-53	2.30925e-49
RBBP8	1	0.668	0.341	0.31829	1.33874e-53	2.65164e-49
SLC25A5	1	0.958	0.924	0.42245	2.7818e-53	5.50991e-49
ITGB3BP	1	0.687	0.359	0.276749	2.80559e-53	5.55704e-49
GMPS	1	0.804	0.494	0.373455	5.64656e-53	1.11841e-48
HIST1H2AK	1	0.526	0.233	0.259423	1.77794e-52	3.52156e-48
HIST2H2AB	1	0.491	0.207	0.272264	2.72508e-52	5.39756e-48
CCNB2	1	0.657	0.335	0.433499	5.30636e-52	1.05103e-47
MCM6	1	0.772	0.469	0.427081	5.93185e-52	1.17492e-47
PRKDC	1	0.881	0.641	0.433982	6.30836e-52	1.2495e-47
EIF4A3	1	0.865	0.609	0.407549	7.49426e-52	1.48439e-47
POLR2L	1	0.951	0.838	0.403317	9.62859e-52	1.90714e-47
HAT1	1	0.816	0.507	0.373859	1.01085e-51	2.00219e-47
RPA2	1	0.808	0.484	0.354663	2.3029e-51	4.56135e-47
PA2G4	1	0.925	0.773	0.421813	2.45305e-51	4.85876e-47
PFN1	1	1	0.999	0.311455	2.58665e-51	5.12337e-47
SMC1A	1	0.841	0.564	0.422751	3.64043e-51	7.2106e-47
HIST1H3J	1	0.392	0.15	0.257261	3.73571e-51	7.39932e-47
JPT1	1	0.944	0.844	0.486709	4.06691e-51	8.05533e-47
HIST1H1D	1	0.918	0.798	0.534613	4.11107e-51	8.14279e-47
SDF2L1	1	0.815	0.489	0.359741	6.58599e-51	1.30449e-46
HMGA1	1	0.874	0.647	0.449787	6.87601e-51	1.36193e-46
TOPBP1	1	0.821	0.489	0.364214	9.79402e-51	1.9399e-46
UBE2S	1	0.861	0.637	0.596378	1.01883e-50	2.018e-46
MSH6	1	0.611	0.307	0.337558	1.29244e-50	2.55994e-46
ARHGAP10	1	0.589	0.301	0.386621	1.32637e-50	2.62714e-46
PNP	1	0.709	0.394	0.32895	5.13306e-50	1.0167e-45
HMGN2	1	0.966	0.938	0.490828	1.07126e-49	2.12185e-45
ACAT2	1	0.763	0.446	0.313976	1.08561e-49	2.15027e-45
ANAPC11	1	0.914	0.718	0.431072	1.11128e-49	2.20112e-45
SLBP	1	0.866	0.657	0.469882	1.5008e-49	2.97263e-45
HIST1H4F	1	0.636	0.338	0.615712	1.93392e-49	3.83052e-45
HIST2H2AC	1	0.747	0.462	0.401197	2.66592e-49	5.28039e-45
ATP5MC3	1	0.958	0.921	0.374387	3.68425e-49	7.2974e-45
MCMBP	1	0.705	0.388	0.325436	4.32364e-49	8.56384e-45
SRSF10	1	0.937	0.831	0.369093	4.52326e-49	8.95922e-45
POLA1	1	0.56	0.274	0.263	5.80637e-49	1.15007e-44
KIF20B	1	0.75	0.45	0.412048	6.81859e-49	1.35056e-44
CDCA3	1	0.414	0.175	0.281916	6.88079e-49	1.36288e-44
SSRP1	1	0.813	0.503	0.353343	1.38422e-48	2.74173e-44
ECI1	1	0.746	0.416	0.282146	2.70274e-48	5.35331e-44
CSE1L	1	0.642	0.334	0.282917	5.21805e-48	1.03354e-43
YWHAH	1	0.84	0.568	0.381982	6.452e-48	1.27795e-43
EXOSC8	1	0.758	0.435	0.306764	7.49304e-48	1.48415e-43
MTHFD1	1	0.717	0.397	0.293786	3.9254e-47	7.77503e-43
GNG5	1	0.963	0.915	0.350796	4.5926e-47	9.09657e-43
SNRPE	1	0.906	0.726	0.402102	5.97395e-47	1.18326e-42
C12orf75	1	0.907	0.73	0.459559	6.03107e-47	1.19457e-42
TXN	1	0.956	0.911	0.416919	1.14532e-46	2.26854e-42
POLD2	1	0.591	0.308	0.270839	1.30201e-46	2.5789e-42
TUBA1C	1	0.775	0.525	0.622132	2.19797e-46	4.35351e-42
TMEM109	1	0.771	0.46	0.333913	2.56656e-46	5.08359e-42
HACD3	1	0.746	0.417	0.288563	4.20259e-46	8.32407e-42
UQCC2	1	0.798	0.484	0.306233	5.55082e-46	1.09945e-41
BUB3	1	0.915	0.766	0.399269	7.32312e-46	1.45049e-41
HNRNPA2B1	1	0.988	0.98	0.375571	9.95589e-46	1.97196e-41
KIF14	1	0.41	0.174	0.301662	1.03734e-45	2.05466e-41
ANXA5	1	0.929	0.809	0.396066	1.18545e-45	2.34802e-41
TFDP1	1	0.866	0.614	0.376511	1.34633e-45	2.66667e-41
FAM111A	1	0.721	0.407	0.280532	1.98871e-45	3.93904e-41
ANP32B	1	0.97	0.922	0.346649	2.36571e-45	4.68575e-41
YEATS4	1	0.772	0.446	0.284191	2.89746e-45	5.73899e-41
CENPK	1	0.753	0.435	0.303535	6.05694e-45	1.1997e-40
NME1	1	0.796	0.536	0.402653	9.20086e-45	1.82241e-40
HMMR	1	0.478	0.224	0.298797	1.38972e-44	2.75263e-40
AC004448.2	1	0.698	0.438	0.710985	1.47638e-44	2.92427e-40
SRSF3	1	0.956	0.916	0.350567	2.07993e-44	4.11971e-40
TACC3	1	0.8	0.511	0.330535	2.0837e-44	4.12718e-40
SNRPF	1	0.933	0.84	0.354385	2.54263e-44	5.03619e-40
LSM5	1	0.881	0.656	0.370575	2.88004e-44	5.7045e-40
POP7	1	0.713	0.401	0.265905	5.3709e-44	1.06381e-39
HIST1H3H	1	0.602	0.333	0.457348	7.9933e-44	1.58323e-39
UCHL5	1	0.677	0.385	0.277007	1.45263e-43	2.87723e-39
ACOT7	1	0.709	0.417	0.293816	2.33149e-43	4.61799e-39
CENPF	1	0.709	0.425	0.541374	3.66835e-43	7.2659e-39
SMC3	1	0.898	0.688	0.342412	5.21811e-43	1.03355e-38
MRPL51	1	0.898	0.7	0.368455	6.34664e-43	1.25708e-38
HNRNPD	1	0.96	0.88	0.341801	6.44324e-43	1.27621e-38
SLC9A3R1	1	0.937	0.79	0.379711	7.9202e-43	1.56875e-38
SUPT16H	1	0.857	0.622	0.364458	1.00867e-42	1.99787e-38
SNRNP40	1	0.767	0.457	0.280047	1.40422e-42	2.78134e-38
BUB1	1	0.52	0.258	0.252996	1.47902e-42	2.9295e-38
PRDX3	1	0.878	0.652	0.3648	1.87144e-42	3.70677e-38
TXNDC17	1	0.903	0.745	0.361329	1.89984e-42	3.76301e-38
ANXA2	1	0.938	0.828	0.452156	3.02501e-42	5.99164e-38
THOC3	1	0.807	0.521	0.331404	3.46448e-42	6.86209e-38
NOP56	1	0.778	0.489	0.318794	1.24528e-41	2.46654e-37
PSMA2	1	0.94	0.84	0.354001	1.86823e-41	3.7004e-37
TIMM10	1	0.726	0.43	0.284437	2.35804e-41	4.67057e-37
PTTG1	1	0.848	0.568	0.422043	3.3763e-41	6.68744e-37
IDH2	1	0.922	0.75	0.381863	4.14886e-41	8.21765e-37
CCNB1	1	0.512	0.252	0.377424	5.87131e-41	1.16293e-36
PSMA7	1	0.955	0.918	0.327312	8.59262e-41	1.70194e-36
COX6A1	1	0.981	0.964	0.295404	9.12075e-41	1.80655e-36
LSM2	1	0.881	0.668	0.34592	9.12555e-41	1.8075e-36
IFNG	1	0.61	0.331	0.360934	1.51005e-40	2.99095e-36
LSM3	1	0.89	0.677	0.341967	2.31528e-40	4.58587e-36
NAA38	1	0.902	0.737	0.340092	3.14838e-40	6.23599e-36
SKA2	1	0.831	0.549	0.329474	3.42379e-40	6.78151e-36
CKAP5	1	0.689	0.403	0.332637	5.94358e-40	1.17724e-35
IMPDH2	1	0.739	0.444	0.297262	6.87109e-40	1.36096e-35
MANF	1	0.717	0.417	0.263017	1.75613e-39	3.47836e-35
ENO1	1	0.955	0.932	0.366209	2.98035e-39	5.90318e-35
EIF1AX	1	0.869	0.642	0.356502	3.18091e-39	6.30042e-35
MEA1	1	0.843	0.551	0.288639	3.90618e-39	7.73697e-35
COX5A	1	0.972	0.938	0.297236	7.66673e-39	1.51855e-34
PRDX1	1	0.933	0.857	0.403911	1.07181e-38	2.12293e-34
ERI1	1	0.702	0.405	0.275467	1.15579e-38	2.28928e-34
NKG7	1	0.729	0.456	0.472935	2.44424e-38	4.84131e-34
ARL6IP6	1	0.731	0.421	0.274128	2.48167e-38	4.91545e-34
FDPS	1	0.84	0.593	0.311157	2.87961e-38	5.70364e-34
ANP32E	1	0.893	0.715	0.381992	2.92092e-38	5.78547e-34
MRPL12	1	0.734	0.442	0.270109	3.36717e-38	6.66935e-34
XRCC5	1	0.922	0.835	0.319712	5.12725e-38	1.01555e-33
SRSF2	1	0.939	0.848	0.344699	6.33481e-38	1.25474e-33
PLK1	1	0.422	0.208	0.437162	7.30862e-38	1.44762e-33
CCT2	1	0.861	0.667	0.359566	7.31958e-38	1.44979e-33
NDUFA6	1	0.933	0.846	0.308227	1.02974e-37	2.03961e-33
MIS18BP1	1	0.849	0.592	0.325051	1.69737e-37	3.36197e-33
PPIH	1	0.788	0.513	0.283043	2.32163e-37	4.59846e-33
HSPD1	1	0.907	0.767	0.404867	3.47877e-37	6.8904e-33
THSD4-AS1	1	0.71	0.434	0.287139	4.70695e-37	9.32305e-33
VPS29	1	0.888	0.691	0.340781	7.79283e-37	1.54353e-32
H2AFY	1	0.931	0.807	0.309593	8.03019e-37	1.59054e-32
PMVK	1	0.835	0.56	0.319441	8.57802e-37	1.69905e-32
CBX3	1	0.925	0.809	0.331562	9.43128e-37	1.86805e-32
CYC1	1	0.878	0.645	0.304367	1.65075e-36	3.26965e-32
NCAPD2	1	0.716	0.422	0.263375	2.93947e-36	5.82222e-32
SEPTIN11	1	0.652	0.377	0.260723	3.29944e-36	6.53519e-32
TALDO1	1	0.905	0.762	0.328934	5.578e-36	1.10483e-31
NDUFB6	1	0.897	0.695	0.330006	5.63854e-36	1.11683e-31
LAGE3	1	0.772	0.494	0.276275	1.04633e-35	2.07247e-31
TCTEX1D2	1	0.721	0.436	0.252451	2.16379e-35	4.28582e-31
TRIM28	1	0.775	0.496	0.270004	2.34847e-35	4.65162e-31
SUZ12	1	0.847	0.643	0.313889	3.09413e-35	6.12855e-31
YBX1	1	0.985	0.958	0.304203	4.97338e-35	9.85078e-31
PTGES3	1	0.927	0.831	0.323961	5.79609e-35	1.14803e-30
HIST1H1E	1	0.968	0.906	0.459515	6.07317e-35	1.20291e-30
MIF	1	0.98	0.964	0.378815	1.77601e-34	3.51775e-30
TRAV38-1	1	0.392	0.183	0.333843	1.80557e-34	3.57629e-30
SUB1	1	0.988	0.978	0.278406	2.77225e-34	5.491e-30
HIST1H2BC	1	0.602	0.357	0.335212	3.41887e-34	6.77177e-30
TOMM5	1	0.921	0.769	0.3194	5.31093e-34	1.05194e-29
NDUFB3	1	0.914	0.753	0.309013	5.33223e-34	1.05616e-29
CALR	1	0.927	0.823	0.370015	9.0356e-34	1.78968e-29
ACTB	1	1	0.999	0.253541	1.90339e-33	3.77005e-29
AC011603.2	1	0.501	0.265	0.252177	2.1729e-33	4.30386e-29
GZMH	1	0.48	0.253	0.516997	2.36324e-33	4.68087e-29
CFL1	1	0.999	0.994	0.25472	3.06576e-33	6.07234e-29
CXCR3	1	0.849	0.608	0.391337	3.16206e-33	6.26309e-29
RECQL	1	0.836	0.57	0.277741	3.63462e-33	7.19909e-29
DLGAP5	1	0.454	0.232	0.287104	4.85168e-33	9.60972e-29
GGCT	1	0.758	0.507	0.300043	6.18768e-33	1.22559e-28
PSME2	1	0.964	0.928	0.317496	7.62324e-33	1.50994e-28
MRPL27	1	0.766	0.49	0.253791	1.00818e-32	1.9969e-28
MYCBP	1	0.769	0.493	0.263751	1.28492e-32	2.54505e-28
CCT6A	1	0.873	0.693	0.319161	1.31236e-32	2.59938e-28
MRPS16	1	0.796	0.52	0.260047	1.37752e-32	2.72845e-28
CALM2	1	0.955	0.903	0.35068	1.53593e-32	3.04221e-28
NAP1L1	1	0.972	0.93	0.287706	1.80831e-32	3.58173e-28
NUDC	1	0.824	0.569	0.282402	2.21923e-32	4.39562e-28
HSPE1	1	0.905	0.792	0.373086	2.79593e-32	5.5379e-28
SNRPD3	1	0.893	0.721	0.299558	3.19045e-32	6.31933e-28
SRSF7	1	0.966	0.921	0.309134	5.36786e-32	1.06321e-27
ZEB2	1	0.61	0.358	0.34057	5.42248e-32	1.07403e-27
SAE1	1	0.812	0.562	0.271692	6.26194e-32	1.2403e-27
POLE3	1	0.794	0.538	0.277504	6.27433e-32	1.24276e-27
ATP5MF	1	0.968	0.937	0.257604	1.2098e-31	2.39625e-27
HIST1H1C	1	0.938	0.862	0.342721	1.77071e-31	3.50725e-27
RBX1	1	0.942	0.862	0.286474	3.26344e-31	6.4639e-27
AKR1B1	1	0.758	0.491	0.253758	4.09437e-31	8.10972e-27
XPO1	1	0.787	0.538	0.281165	1.22101e-30	2.41846e-26
P4HB	1	0.893	0.713	0.315328	2.94602e-30	5.83518e-26
SRI	1	0.888	0.703	0.290662	6.47566e-30	1.28263e-25
RAB27A	1	0.868	0.633	0.28956	9.89578e-30	1.96006e-25
ANP32A	1	0.902	0.763	0.295361	1.06476e-29	2.10896e-25
CSNK2B	1	0.947	0.881	0.252018	1.20811e-29	2.39291e-25
UQCRQ	1	0.948	0.873	0.281986	1.64165e-29	3.25162e-25
PSMB2	1	0.909	0.762	0.301233	2.34896e-29	4.65259e-25
CD99	1	0.981	0.936	0.274371	2.51941e-29	4.99019e-25
VDAC3	1	0.874	0.66	0.27441	2.9386e-29	5.82048e-25
COPS3	1	0.827	0.593	0.268795	4.45197e-29	8.81801e-25
UBE2I	1	0.921	0.812	0.275501	4.45772e-29	8.82941e-25
TCP1	1	0.857	0.65	0.270571	6.30132e-29	1.2481e-24
CACYBP	1	0.921	0.818	0.283992	1.01782e-28	2.016e-24
CKLF	1	0.935	0.8	0.290818	1.14678e-28	2.27142e-24
IER3IP1	1	0.823	0.583	0.251626	1.2561e-28	2.48795e-24
PDIA6	1	0.884	0.694	0.296183	1.37913e-28	2.73164e-24
CISD3	1	0.79	0.533	0.256027	1.55397e-28	3.07795e-24
CLTA	1	0.911	0.789	0.278034	1.67332e-28	3.31435e-24
PRELID1	1	0.923	0.807	0.282185	4.64699e-28	9.20429e-24
NDUFB1	1	0.943	0.823	0.266004	6.26578e-28	1.24106e-23
CDK2AP2	1	0.894	0.717	0.282555	1.23834e-27	2.45277e-23
PARP1	1	0.911	0.795	0.301533	1.47523e-27	2.92198e-23
TRAV13-1	1	0.459	0.256	0.509607	4.8472e-27	9.60085e-23
RBBP4	1	0.881	0.725	0.256455	4.87039e-27	9.64679e-23
ATP5MC1	1	0.804	0.582	0.266661	5.32938e-27	1.05559e-22
PSMB3	1	0.956	0.887	0.258904	1.46287e-26	2.89751e-22
LGALS1	1	0.89	0.771	0.51916	1.73651e-26	3.4395e-22
PDCD5	1	0.911	0.756	0.291945	2.09681e-26	4.15315e-22
NDUFB2	1	0.948	0.863	0.26318	2.96826e-26	5.87923e-22
CCT5	1	0.847	0.631	0.263752	4.16654e-26	8.25267e-22
PSMA4	1	0.923	0.81	0.252253	7.78263e-26	1.54151e-21
NDUFS6	1	0.919	0.784	0.261411	9.24395e-26	1.83095e-21
NME2	1	0.964	0.935	0.294446	9.82313e-26	1.94567e-21
TRBV2	1	0.439	0.238	0.525401	2.45464e-25	4.86191e-21
PRDX2	1	0.919	0.822	0.289986	2.81291e-25	5.57153e-21
TRMT112	1	0.921	0.826	0.254499	7.7682e-25	1.53865e-20
PHB	1	0.763	0.544	0.250995	1.12128e-24	2.22093e-20
HSP90B1	1	0.896	0.751	0.276949	1.95196e-24	3.86624e-20
NHP2	1	0.844	0.658	0.25643	2.49604e-24	4.94391e-20
SELENOH	1	0.927	0.812	0.254733	2.66878e-24	5.28605e-20
YWHAE	1	0.899	0.748	0.251852	4.08428e-24	8.08973e-20
NDUFAB1	1	0.909	0.765	0.256029	1.66782e-23	3.30344e-19
ACTR3	1	0.946	0.883	0.254249	3.10818e-23	6.15637e-19
PRDX5	1	0.914	0.775	0.270429	4.11806e-23	8.15663e-19
ANXA1	1	0.868	0.636	0.320966	3.08386e-22	6.10819e-18
CD70	1	0.493	0.304	0.274332	1.90393e-21	3.77111e-17
C1QBP	1	0.888	0.741	0.26415	8.27556e-21	1.63914e-16
PKM	1	0.933	0.822	0.268007	8.2767e-21	1.63937e-16
S100A11	1	0.959	0.898	0.267238	2.45567e-20	4.86395e-16
CDC25B	1	0.827	0.624	0.2536	4.05929e-20	8.04024e-16
NCL	1	0.954	0.908	0.260051	4.13185e-20	8.18395e-16
HSP90AB1	1	0.958	0.907	0.314284	5.44049e-20	1.0776e-15
HIST1H2AC	1	0.602	0.431	0.264265	1.85292e-18	3.67009e-14
RPL22L1	1	0.899	0.796	0.26318	4.07343e-16	8.06824e-12
GZMB	1	0.291	0.168	0.363385	1.79751e-14	3.56033e-10
ARL6IP1	1	0.944	0.875	0.417911	8.63931e-11	1.71119e-06
HIST1H3G	4	0.946	0.215	1.85783	8.8745e-307	1.75777e-302
HIST1H2AH	4	0.961	0.261	2.22998	5.87709e-302	1.16407e-297
HIST1H2AL	4	0.963	0.279	2.29564	5.73442e-295	1.13582e-290
HIST1H3B	4	0.977	0.307	2.24979	4.86666e-287	9.63939e-283
HIST1H2AJ	4	0.988	0.338	2.51038	1.74983e-286	3.46589e-282
HIST1H3F	4	0.897	0.204	1.75488	6.12035e-282	1.21226e-277
HIST1H3C	4	0.936	0.257	1.98357	1.155e-274	2.2877e-270
HIST2H2AB	4	0.86	0.181	1.33916	1.03935e-273	2.05864e-269
HIST1H2BF	4	0.893	0.209	1.57149	7.02762e-272	1.39196e-267
HIST1H1B	4	0.988	0.406	2.54083	1.09542e-270	2.16971e-266
HIST1H2AB	4	0.831	0.169	1.35861	1.1523e-264	2.28236e-260
HIST1H2BH	4	0.88	0.22	1.3765	2.21901e-258	4.39519e-254
HIST1H3D	4	0.973	0.391	1.91536	3.9758e-256	7.87487e-252
HIST1H2AI	4	0.977	0.399	2.99529	1.66282e-253	3.29355e-249
HIST1H2AG	4	0.961	0.33	1.69782	1.33788e-245	2.64993e-241
HIST2H2BF	4	0.837	0.19	1.31675	1.40413e-242	2.78117e-238
HIST1H2AM	4	0.988	0.612	2.39384	2.14276e-237	4.24416e-233
RRM2	4	0.99	0.414	1.76943	2.11074e-235	4.18074e-231
NUSAP1	4	0.977	0.371	1.56852	3.14035e-235	6.2201e-231
DIAPH3	4	0.872	0.218	0.979405	1.39503e-231	2.76313e-227
PKMYT1	4	0.911	0.256	1.04158	1.43954e-231	2.8513e-227
CDK1	4	0.919	0.238	1.05786	4.63104e-230	9.1727e-226
HIST1H3H	4	0.921	0.312	1.81474	1.19115e-226	2.35932e-222
HIST1H2AE	4	0.88	0.258	1.49076	2.91961e-225	5.78286e-221
HJURP	4	0.733	0.141	0.726905	1.51973e-217	3.01013e-213
ESCO2	4	0.738	0.154	0.694651	6.69582e-215	1.32624e-210
UBE2C	4	0.911	0.249	1.25781	8.17744e-215	1.61971e-210
FBXO5	4	0.888	0.264	1.04043	1.33292e-212	2.64012e-208
TYMS	4	0.996	0.439	1.54935	1.0515e-210	2.0827e-206
CDCA5	4	0.82	0.214	0.832747	1.42978e-207	2.83197e-203
HIST1H4C	4	0.998	0.899	2.28142	1.01625e-205	2.01288e-201
NCAPG	4	0.872	0.24	0.892422	5.77137e-204	1.14314e-199
HIST1H4D	4	0.702	0.138	0.800347	3.64105e-203	7.21183e-199
CKAP2L	4	0.727	0.151	0.697184	7.02289e-203	1.39102e-198
HIST1H1C	4	0.994	0.861	1.8948	1.44019e-199	2.85258e-195
H2AFX	4	0.961	0.438	1.32512	7.12113e-197	1.41048e-192
KIFC1	4	0.818	0.216	0.801514	2.49291e-194	4.9377e-190
TOP2A	4	0.946	0.348	1.36595	4.23127e-194	8.38088e-190
HIST1H1D	4	0.992	0.797	1.8908	9.18617e-193	1.8195e-188
HIST1H2AK	4	0.804	0.219	0.893971	4.84528e-191	9.59705e-187
CDCA8	4	0.835	0.219	0.877092	4.93822e-191	9.78112e-187
SPC25	4	0.76	0.186	0.704565	4.58821e-189	9.08787e-185
CCNA2	4	0.888	0.262	0.905598	2.01886e-188	3.99875e-184
PCNA	4	0.99	0.485	1.53463	1.08422e-187	2.14752e-183
MKI67	4	0.998	0.518	1.45814	8.82209e-186	1.74739e-181
HIST2H2AC	4	0.948	0.457	1.363	1.08103e-185	2.14119e-181
HIST1H2BB	4	0.634	0.123	0.80279	2.62967e-184	5.2086e-180
TMPO	4	0.988	0.618	1.34087	8.94001e-184	1.77075e-179
SKA3	4	0.789	0.209	0.668482	8.17316e-183	1.61886e-178
KIF11	4	0.897	0.316	1.01987	1.49503e-182	2.9612e-178
HIST1H4F	4	0.897	0.327	1.74017	3.76174e-182	7.45087e-178
ZWINT	4	0.93	0.353	0.983572	8.87296e-182	1.75747e-177
KIF15	4	0.775	0.2	0.704094	1.56987e-181	3.10945e-177
KIF2C	4	0.756	0.187	0.719216	3.07645e-181	6.09352e-177
KNL1	4	0.915	0.327	1.03733	3.23797e-181	6.41345e-177
KIF23	4	0.738	0.173	0.731358	5.90642e-181	1.16989e-176
HIST1H2BJ	4	0.75	0.199	1.14819	5.8943e-179	1.16748e-174
MYBL2	4	0.921	0.322	0.912117	3.26526e-177	6.46749e-173
ANLN	4	0.702	0.167	0.669282	1.56489e-175	3.09957e-171
HIST1H4E	4	0.762	0.21	1.01382	2.07699e-174	4.1139e-170
TK1	4	0.969	0.432	1.11183	2.60026e-174	5.15034e-170
POLQ	4	0.767	0.204	0.754812	3.2392e-174	6.41588e-170
NCAPG2	4	0.88	0.304	0.846599	1.83819e-173	3.64091e-169
GTSE1	4	0.795	0.216	0.775928	1.93503e-172	3.83271e-168
ASF1B	4	0.909	0.321	0.933376	4.77421e-172	9.45628e-168
NCAPH	4	0.851	0.271	0.800083	6.73291e-172	1.33359e-167
HIST1H3J	4	0.647	0.135	0.662281	7.16988e-171	1.42014e-166
STIL	4	0.781	0.219	0.707584	8.24704e-171	1.63349e-166
STMN1	4	0.996	0.613	1.43215	9.43524e-171	1.86884e-166
E2F7	4	0.572	0.11	0.583074	1.71793e-166	3.40271e-162
HIST1H1E	4	0.992	0.907	1.92938	7.41893e-166	1.46947e-161
ATAD2	4	0.961	0.45	1.12901	1.69308e-164	3.35347e-160
HIST1H2BM	4	0.508	0.082	0.751306	3.81285e-164	7.55212e-160
HIST1H2BO	4	0.523	0.087	0.52186	1.42318e-163	2.81889e-159
SKA1	4	0.733	0.194	0.591415	6.78699e-163	1.3443e-158
E2F8	4	0.605	0.127	0.521878	8.10138e-163	1.60464e-158
NDC80	4	0.87	0.299	0.831551	1.90185e-162	3.76699e-158
HIST1H2BC	4	0.866	0.341	1.25643	2.84012e-160	5.62543e-156
HIST1H3I	4	0.667	0.16	0.734028	6.31932e-160	1.25167e-155
CLSPN	4	0.955	0.371	1.00962	6.66891e-160	1.32091e-155
LIG1	4	0.901	0.342	0.87247	2.9292e-159	5.80187e-155
SMC2	4	0.955	0.385	0.891531	2.03784e-158	4.03635e-154
TUBB	4	0.998	0.73	1.45056	6.18019e-158	1.22411e-153
PCLAF	4	0.996	0.581	1.11852	6.02157e-157	1.19269e-152
CDCA2	4	0.692	0.17	0.663834	6.66464e-157	1.32007e-152
RAD51AP1	4	0.781	0.239	0.698051	4.02245e-156	7.96726e-152
MCM7	4	0.973	0.446	1.09899	1.8622e-155	3.68845e-151
FEN1	4	0.915	0.35	0.848354	3.58807e-152	7.10689e-148
SMC4	4	0.99	0.587	1.10087	1.95328e-151	3.86885e-147
PRC1	4	0.816	0.265	0.737353	2.59805e-149	5.14595e-145
DUT	4	0.996	0.741	1.18403	3.32165e-149	6.5792e-145
ASPM	4	0.824	0.26	0.866098	1.13163e-148	2.24141e-144
HIST1H4I	4	0.56	0.116	0.651985	1.2215e-147	2.41943e-143
HIST1H2AD	4	0.564	0.118	0.613762	1.7705e-147	3.50683e-143
ECT2	4	0.705	0.19	0.594952	3.89601e-147	7.71683e-143
TPX2	4	0.903	0.337	0.94102	5.36991e-147	1.06362e-142
HIST1H2BL	4	0.523	0.096	0.498875	8.46386e-147	1.67644e-142
FOXM1	4	0.767	0.235	0.632937	1.08127e-146	2.14167e-142
CENPU	4	0.909	0.343	0.844185	6.07343e-146	1.20296e-141
MELK	4	0.729	0.215	0.62108	5.07761e-144	1.00572e-139
MXD3	4	0.62	0.149	0.569504	7.77232e-144	1.53946e-139
HIST1H2BI	4	0.45	0.071	0.478104	2.1927e-143	4.34308e-139
FANCI	4	0.88	0.348	0.810329	7.9959e-143	1.58375e-138
HIST3H2BB	4	0.378	0.046	0.362735	8.90451e-143	1.76372e-138
CENPM	4	0.975	0.514	0.922087	1.46899e-141	2.90963e-137
TMEM106C	4	0.901	0.373	0.790822	1.42824e-140	2.82892e-136
CDT1	4	0.932	0.386	0.845269	3.34551e-138	6.62645e-134
CENPP	4	0.901	0.354	0.861853	1.04364e-137	2.06714e-133
ATAD5	4	0.853	0.322	0.741911	1.88067e-137	3.72504e-133
HMGB2	4	0.998	0.858	1.16478	5.80712e-137	1.15022e-132
FAM111B	4	0.684	0.194	0.627639	3.2168e-136	6.37152e-132
HIST1H2BN	4	0.779	0.266	0.796258	2.2843e-134	4.52451e-130
USP1	4	0.977	0.564	0.86671	6.65352e-134	1.31786e-129
HIST1H2AC	4	0.907	0.405	1.03636	2.6287e-133	5.20667e-129
UBE2T	4	0.808	0.281	0.665578	3.32419e-133	6.58422e-129
TUBA1B	4	1	0.716	1.34964	5.43141e-133	1.0758e-128
DNMT1	4	0.983	0.628	0.930073	6.7104e-133	1.32913e-128
UHRF1	4	0.829	0.292	0.684759	1.32481e-132	2.62404e-128
CKS1B	4	0.903	0.371	0.838092	2.99649e-132	5.93514e-128
RRM1	4	0.961	0.538	0.877968	9.43617e-132	1.86902e-127
SHCBP1	4	0.758	0.244	0.623088	1.32552e-131	2.62546e-127
CDC45	4	0.769	0.251	0.623254	1.54067e-131	3.05161e-127
WDR34	4	0.808	0.283	0.61585	3.39417e-131	6.72284e-127
DHFR	4	0.924	0.433	0.860968	5.65179e-131	1.11945e-126
KIF22	4	0.921	0.434	0.871892	5.92804e-131	1.17417e-126
DTL	4	0.857	0.307	0.793672	2.23191e-130	4.42075e-126
TTK	4	0.595	0.145	0.466721	3.0923e-130	6.12491e-126
DNAJC9	4	0.965	0.49	0.881085	4.49384e-130	8.90095e-126
DEK	4	0.998	0.851	0.910139	6.98436e-129	1.38339e-124
EZH2	4	0.959	0.518	0.878804	1.36432e-128	2.7023e-124
MND1	4	0.688	0.207	0.514467	1.74265e-127	3.45167e-123
CDCA4	4	0.835	0.326	0.697019	1.33743e-126	2.64904e-122
H2AFZ	4	0.996	0.868	1.06168	3.22977e-126	6.3972e-122
CKS2	4	0.928	0.472	0.91928	1.92411e-125	3.81109e-121
BUB1B	4	0.579	0.141	0.445031	3.01996e-125	5.98164e-121
TACC3	4	0.95	0.513	0.832743	5.03832e-125	9.9794e-121
AURKB	4	0.74	0.237	0.647721	6.73743e-125	1.33448e-120
RACGAP1	4	0.674	0.198	0.547926	2.12192e-124	4.20289e-120
DSCC1	4	0.645	0.177	0.451834	1.4256e-123	2.82368e-119
HIST1H4H	4	0.605	0.156	0.64227	2.14673e-123	4.25203e-119
MCM4	4	0.901	0.38	0.802303	1.41146e-122	2.79567e-118
CENPN	4	0.905	0.384	0.672242	6.04711e-122	1.19775e-117
CDC6	4	0.719	0.233	0.587131	5.06532e-117	1.00329e-112
GMNN	4	0.893	0.41	0.736006	2.86639e-116	5.67746e-112
BRCA2	4	0.8	0.294	0.62347	3.00445e-116	5.95092e-112
CCNF	4	0.572	0.148	0.460422	5.04222e-116	9.98712e-112
ZGRF1	4	0.587	0.162	0.47365	1.40918e-114	2.79117e-110
CENPF	4	0.909	0.42	0.918875	5.02726e-114	9.9575e-110
HMGB1	4	1	0.988	0.756949	7.03456e-114	1.39334e-109
MAD2L1	4	0.876	0.363	0.66917	8.46819e-114	1.67729e-109
EXO1	4	0.612	0.181	0.540477	1.31763e-112	2.60983e-108
SGO2	4	0.671	0.202	0.508019	1.79282e-112	3.55104e-108
PLK4	4	0.616	0.179	0.416227	8.50081e-112	1.68376e-107
WDR76	4	0.769	0.29	0.603653	1.01735e-111	2.01507e-107
SPC24	4	0.628	0.188	0.464172	1.23014e-111	2.43654e-107
KIF4A	4	0.628	0.18	0.456921	1.75484e-110	3.4758e-106
INCENP	4	0.593	0.169	0.499271	8.59402e-110	1.70222e-105
RAD51	4	0.727	0.261	0.560656	1.56e-108	3.08989e-104
MCM3	4	0.924	0.445	0.799524	1.70008e-107	3.36735e-103
SRSF10	4	0.996	0.831	0.749622	1.84265e-107	3.64973e-103
NCAPD3	4	0.851	0.372	0.654039	1.89581e-107	3.75503e-103
UBE2S	4	0.981	0.637	0.86685	2.66214e-107	5.27291e-103
EIF4A3	4	0.965	0.615	0.786121	4.12315e-107	8.16671e-103
RFWD3	4	0.715	0.251	0.521177	4.53419e-107	8.98087e-103
CIP2A	4	0.647	0.203	0.463584	5.69217e-107	1.12745e-102
NASP	4	0.994	0.698	0.835482	1.55729e-105	3.08453e-101
LMNB1	4	0.963	0.572	0.795892	1.67447e-105	3.31662e-101
CDCA3	4	0.595	0.169	0.44655	3.00013e-105	5.94236e-101
BRCA1	4	0.746	0.279	0.592248	7.66938e-105	1.51907e-100
CARHSP1	4	0.996	0.727	0.749952	8.64468e-105	1.71225e-100
PBK	4	0.523	0.135	0.35757	1.14735e-104	2.27256e-100
NSD2	4	0.924	0.487	0.752804	3.28842e-104	6.51337e-100
SGO1	4	0.676	0.229	0.506669	1.4294e-103	2.83122e-99
SMC3	4	0.969	0.694	0.790685	1.45745e-103	2.88676e-99
CIT	4	0.622	0.196	0.469671	1.50344e-103	2.97786e-99
ORC6	4	0.713	0.248	0.472438	4.63065e-102	9.17193e-98
SAC3D1	4	0.645	0.213	0.508239	6.2351e-102	1.23499e-97
SPAG5	4	0.531	0.14	0.36084	7.92722e-101	1.57014e-96
CEP55	4	0.756	0.271	0.490953	4.90133e-100	9.70806e-96
WDR62	4	0.471	0.117	0.353885	5.73874e-100	1.13667e-95
PTMA	4	1	0.998	0.590276	1.85307e-98	3.67038e-94
MASTL	4	0.69	0.241	0.456838	2.65177e-98	5.25237e-94
CENPE	4	0.756	0.292	0.694693	8.60582e-98	1.70456e-93
CDC25A	4	0.517	0.14	0.372858	3.94461e-97	7.81308e-93
LINC01572	4	0.558	0.166	0.55565	6.1709e-97	1.22227e-92
RFC4	4	0.841	0.364	0.558093	1.13043e-96	2.23905e-92
BRIP1	4	0.688	0.248	0.563891	1.72795e-96	3.42255e-92
HNRNPAB	4	0.961	0.576	0.772364	1.01175e-95	2.00396e-91
MCM5	4	0.936	0.464	0.750656	1.20455e-95	2.38585e-91
NUF2	4	0.715	0.264	0.53758	1.79261e-95	3.55063e-91
NCAPH2	4	0.698	0.263	0.457996	8.54993e-94	1.69348e-89
TCF19	4	0.643	0.224	0.428757	1.36704e-93	2.70769e-89
CEP152	4	0.684	0.246	0.488349	2.77038e-93	5.48729e-89
ZNF367	4	0.678	0.243	0.538896	8.36783e-93	1.65742e-88
CDKN2C	4	0.62	0.209	0.487488	7.27001e-92	1.43997e-87
BIRC5	4	0.903	0.405	0.666842	1.16398e-91	2.30549e-87
FANCB	4	0.579	0.182	0.375711	1.31958e-91	2.6137e-87
ALYREF	4	0.992	0.762	0.732737	1.4825e-91	2.93638e-87
FAM111A	4	0.862	0.412	0.583747	6.05132e-91	1.19858e-86
CHAF1A	4	0.812	0.348	0.536068	1.0298e-90	2.03973e-86
MCM10	4	0.63	0.216	0.476029	1.21928e-90	2.41503e-86
GGH	4	0.634	0.224	0.432931	3.11734e-90	6.17451e-86
DEPDC1B	4	0.624	0.215	0.444831	9.16792e-89	1.81589e-84
LRR1	4	0.783	0.338	0.533308	1.02716e-88	2.0345e-84
ARHGAP11A	4	0.709	0.269	0.479337	1.22497e-87	2.42629e-83
RBBP8	4	0.789	0.349	0.570861	1.97552e-87	3.91292e-83
SIVA1	4	0.971	0.627	0.666547	1.57788e-86	3.1253e-82
GINS2	4	0.839	0.357	0.625139	4.10375e-86	8.12829e-82
CENPW	4	0.88	0.393	0.572314	1.14873e-85	2.27529e-81
HIRIP3	4	0.723	0.298	0.522379	1.5594e-85	3.08871e-81
RNASEH2A	4	0.767	0.324	0.480022	2.85633e-85	5.65753e-81
ANP32B	4	0.998	0.922	0.596139	2.86835e-85	5.68133e-81
KIF18B	4	0.395	0.091	0.281467	1.04397e-84	2.06778e-80
RAD54L	4	0.411	0.102	0.307777	2.65441e-84	5.25759e-80
POLA1	4	0.709	0.276	0.46836	2.8382e-84	5.62162e-80
CENPX	4	0.909	0.503	0.638429	4.29071e-84	8.49862e-80
FANCD2	4	0.647	0.239	0.422608	4.80994e-84	9.52704e-80
SAE1	4	0.948	0.563	0.604131	8.48042e-84	1.67972e-79
SMC1A	4	0.942	0.571	0.711287	1.16096e-83	2.29952e-79
TIMELESS	4	0.698	0.278	0.447429	1.26802e-83	2.51157e-79
KIF18A	4	0.585	0.198	0.400114	1.47822e-83	2.9279e-79
RANBP1	4	0.967	0.657	0.697175	4.0884e-83	8.09789e-79
NEIL3	4	0.39	0.091	0.261252	5.87632e-83	1.16392e-78
HMMR	4	0.64	0.221	0.410114	1.34817e-82	2.67032e-78
KIF14	4	0.541	0.174	0.441283	4.42513e-82	8.76485e-78
HIST2H2BE	4	0.32	0.06	0.252282	5.64781e-82	1.11866e-77
MTFR2	4	0.558	0.18	0.353204	6.71672e-82	1.33038e-77
CENPJ	4	0.529	0.168	0.348699	1.50834e-81	2.98756e-77
VRK1	4	0.857	0.414	0.513518	1.50889e-81	2.98866e-77
MCM2	4	0.8	0.339	0.561082	3.26331e-81	6.46363e-77
LIN54	4	0.655	0.25	0.409193	3.60539e-81	7.1412e-77
TTF2	4	0.705	0.285	0.460649	1.4478e-80	2.86766e-76
RFC2	4	0.769	0.335	0.476692	2.44306e-80	4.83896e-76
YEATS4	4	0.876	0.456	0.582916	3.14086e-80	6.2211e-76
DNA2	4	0.531	0.172	0.35631	4.32267e-80	8.56191e-76
CKAP5	4	0.822	0.406	0.599205	1.25333e-79	2.48248e-75
RBL1	4	0.911	0.511	0.637707	1.37804e-79	2.72948e-75
DLGAP5	4	0.636	0.224	0.495707	1.56739e-79	3.10452e-75
CENPH	4	0.733	0.313	0.450523	1.58765e-79	3.14465e-75
RAD51C	4	0.789	0.359	0.480383	5.99495e-79	1.18742e-74
HIST1H4A	4	0.353	0.077	0.295906	1.99294e-78	3.94742e-74
DDX39A	4	0.975	0.648	0.641619	3.73091e-78	7.38981e-74
HELLS	4	0.872	0.457	0.651813	1.05214e-77	2.08398e-73
CSE1L	4	0.748	0.342	0.519024	2.71794e-77	5.38342e-73
CHEK1	4	0.785	0.347	0.481826	5.19549e-77	1.02907e-72
CBX5	4	0.882	0.473	0.577353	7.70173e-77	1.52548e-72
TOPBP1	4	0.909	0.501	0.577742	4.0081e-76	7.93885e-72
HIST1H2BK	4	0.762	0.351	0.760405	8.483e-76	1.68023e-71
E2F1	4	0.64	0.249	0.419688	5.50633e-75	1.09064e-70
SUZ12	4	0.955	0.644	0.585877	8.08786e-75	1.60196e-70
CCNB2	4	0.808	0.339	0.491356	8.28814e-75	1.64163e-70
H2AFV	4	0.998	0.912	0.584094	2.05715e-74	4.0746e-70
HNRNPF	4	0.988	0.823	0.628706	3.45816e-74	6.84957e-70
TUBB4B	4	0.936	0.632	0.758251	4.61977e-74	9.15038e-70
KIF20B	4	0.882	0.454	0.56605	4.89942e-74	9.70428e-70
TUBG1	4	0.669	0.267	0.370804	1.76963e-73	3.5051e-69
C21orf58	4	0.424	0.118	0.334795	4.77314e-73	9.45417e-69
HIST1H1A	4	0.419	0.118	0.411699	9.90674e-73	1.96223e-68
FAM83D	4	0.459	0.132	0.289702	1.05597e-72	2.09155e-68
E2F2	4	0.589	0.217	0.378178	6.44296e-72	1.27616e-67
RTTN	4	0.62	0.246	0.429608	2.29686e-71	4.54939e-67
MIS18BP1	4	0.936	0.599	0.580323	5.27753e-71	1.04532e-66
SASS6	4	0.612	0.231	0.367532	5.32775e-71	1.05527e-66
HIST1H2BD	4	0.535	0.188	0.411248	6.67105e-71	1.32134e-66
RFC3	4	0.595	0.226	0.379706	7.17552e-71	1.42126e-66
DTYMK	4	0.862	0.409	0.494823	1.31619e-70	2.60698e-66
ACYP1	4	0.727	0.321	0.415659	3.18937e-70	6.3172e-66
POLE	4	0.605	0.229	0.353561	1.84699e-69	3.65833e-65
AC091057.6	4	0.428	0.122	0.251573	2.42314e-69	4.79952e-65
ARHGAP19	4	0.63	0.243	0.358378	6.34757e-69	1.25726e-64
KPNA2	4	0.841	0.426	0.535142	1.05536e-68	2.09034e-64
CTNNAL1	4	0.705	0.306	0.435165	1.19176e-68	2.36052e-64
CENPO	4	0.475	0.157	0.320292	1.92423e-68	3.81132e-64
DDX11	4	0.57	0.214	0.349342	2.27911e-68	4.51424e-64
HMGA1	4	0.961	0.653	0.618128	3.62393e-68	7.17791e-64
HIST1H4B	4	0.337	0.081	0.315996	1.10003e-67	2.17884e-63
CDK2	4	0.552	0.203	0.314453	2.16245e-67	4.28316e-63
H2AFY	4	0.979	0.81	0.545106	5.30203e-67	1.05017e-62
ORC1	4	0.529	0.195	0.365191	1.13737e-66	2.25278e-62
SAMD1	4	0.506	0.174	0.332813	1.34483e-66	2.6637e-62
CDC7	4	0.622	0.254	0.390368	1.39614e-66	2.76533e-62
NUDT1	4	0.961	0.601	0.571207	3.45236e-66	6.83808e-62
PRIM1	4	0.649	0.266	0.36055	2.43417e-65	4.82137e-61
HIST1H2BG	4	0.353	0.092	0.312586	6.17858e-65	1.22379e-60
FAF1	4	0.907	0.577	0.591463	1.1542e-64	2.28613e-60
CENPA	4	0.552	0.205	0.389573	1.22492e-64	2.4262e-60
SLC20A1	4	0.76	0.387	0.504274	1.35064e-64	2.67521e-60
BUB1	4	0.632	0.262	0.432461	3.10824e-64	6.1565e-60
CENPL	4	0.432	0.136	0.266537	7.21033e-64	1.42815e-59
RPA3	4	0.975	0.689	0.579047	1.17508e-63	2.32749e-59
CCDC34	4	0.576	0.224	0.327847	3.78659e-63	7.5001e-59
NRM	4	0.663	0.28	0.353392	5.09653e-63	1.00947e-58
HMGN2	4	0.998	0.936	0.661084	1.88947e-62	3.74247e-58
RFC5	4	0.667	0.291	0.380095	1.99215e-62	3.94585e-58
NUP160	4	0.733	0.331	0.381201	2.75491e-62	5.45665e-58
CENPQ	4	0.514	0.185	0.291478	3.05386e-62	6.04878e-58
ITGB3BP	4	0.762	0.372	0.439583	3.44401e-62	6.82155e-58
AC011603.2	4	0.638	0.264	0.4277	3.97742e-62	7.87807e-58
SRSF3	4	0.994	0.914	0.498651	4.33471e-62	8.58576e-58
BARD1	4	0.783	0.391	0.434777	7.58127e-62	1.50162e-57
HADH	4	0.733	0.353	0.410286	1.51628e-61	3.0033e-57
MCM8	4	0.457	0.153	0.298472	1.5349e-61	3.04017e-57
PRKDC	4	0.946	0.649	0.603267	1.55182e-61	3.07368e-57
OIP5	4	0.51	0.19	0.298327	4.98432e-61	9.87244e-57
CDK4	4	0.802	0.411	0.441705	6.4342e-61	1.27442e-56
RAD21	4	0.992	0.834	0.555356	2.21306e-60	4.38341e-56
CDK5RAP2	4	0.731	0.346	0.422908	5.33047e-60	1.05581e-55
HAUS8	4	0.486	0.176	0.291779	1.74333e-59	3.45302e-55
[truncated: 1,319 more rows]

## Sheet: Table_S2B
Supplementary Table 2B. Significantly up- and down-regulated genes in cluster 5 versus cluster 2.
Genes	Fraction expressed in cluster 5	Fraction expressed in cluster 2	Average log2 Fold Change	p-value	Adjusted p-value
GNLY	0.215	0.012	4.27825	3.81283e-33	7.55207e-29
NKG7	0.939	0.137	3.57272	8.86341e-195	1.75558e-190
GZMA	0.92	0.196	3.54783	3.9195e-186	7.76336e-182
CCL5	0.901	0.334	3.28679	1.66413e-144	3.29614e-140
CCL4	0.502	0.02	2.59724	7.00743e-82	1.38796e-77
LAG3	0.962	0.393	2.51067	2.42674e-162	4.80665e-158
PRF1	0.87	0.221	2.36498	1.13708e-149	2.25221e-145
GZMB	0.467	0.013	2.27639	4.51859e-79	8.94997e-75
GZMK	0.792	0.324	2.09986	1.91572e-80	3.79446e-76
GZMH	0.55	0.019	1.93112	6.87063e-97	1.36087e-92
TRBV11-2	0.101	0.025	1.79571	1.00124e-12	1.98315e-08
CST7	0.979	0.696	1.65967	1.29526e-131	2.56551e-127
C12orf75	0.929	0.406	1.61571	2.75115e-138	5.44921e-134
LGALS3	0.816	0.192	1.60938	3.63118e-115	7.19228e-111
IFI27	0.585	0.241	1.56933	1.65363e-31	3.27534e-27
CEBPD	0.604	0.034	1.51008	1.24586e-101	2.46767e-97
PRDM1	0.84	0.202	1.50394	1.51928e-118	3.00923e-114
TNFRSF1B	0.917	0.548	1.41384	4.43363e-89	8.78169e-85
FGFBP2	0.514	0.059	1.40423	1.84883e-66	3.66197e-62
LGALS1	0.896	0.555	1.38523	3.69528e-59	7.31924e-55
CTLA4	0.917	0.599	1.33856	3.62868e-84	7.18733e-80
F2R	0.762	0.157	1.31448	3.58526e-100	7.10132e-96
HAVCR2	0.731	0.128	1.31448	9.28252e-101	1.83859e-96
S100A4	0.972	0.953	1.276	4.82351e-81	9.55392e-77
SYTL2	0.63	0.078	1.22286	5.72115e-88	1.13319e-83
CD59	0.88	0.533	1.21824	8.71469e-85	1.72612e-80
LYAR	0.792	0.373	1.20805	3.30018e-62	6.53666e-58
PLEK	0.545	0.057	1.16365	1.84874e-77	3.6618e-73
HCST	0.986	0.943	1.15919	1.31082e-89	2.59634e-85
CLDND1	0.877	0.707	1.12812	1.54076e-44	3.05178e-40
ANXA2	0.915	0.68	1.12184	3.6497e-68	7.22896e-64
IKZF3	0.835	0.413	1.10545	5.79849e-72	1.14851e-67
ZBP1	0.71	0.172	1.08216	5.6705e-78	1.12316e-73
CXCR6	0.481	0.024	1.07441	5.17965e-77	1.02593e-72
CD70	0.493	0.099	1.0362	1.52725e-46	3.02502e-42
IFNG	0.557	0.148	1.03348	1.0381e-48	2.05616e-44
LINC01943	0.571	0.192	1.00905	4.67769e-47	9.26511e-43
IQGAP2	0.934	0.762	1.00793	4.53772e-77	8.98786e-73
CXCR3	0.816	0.484	0.990139	4.98545e-50	9.87467e-46
ACTN4	0.762	0.342	0.982507	2.7375e-68	5.42217e-64
CTSC	0.877	0.602	0.981682	2.30487e-72	4.56526e-68
TRBV2	0.314	0.137	0.977738	4.51767e-11	8.94814e-07
PTMS	0.757	0.445	0.970549	1.2346e-35	2.44536e-31
APOBEC3G	0.755	0.361	0.969505	4.80983e-68	9.52682e-64
IL32	0.998	0.981	0.967127	9.55684e-65	1.89292e-60
AHNAK	0.943	0.728	0.950117	1.40744e-46	2.78772e-42
VPS37B	0.783	0.428	0.92591	6.97635e-51	1.38181e-46
SAMD3	0.776	0.369	0.92532	3.72856e-53	7.38515e-49
RGS1	0.884	0.772	0.924181	3.69098e-30	7.31073e-26
MYO1F	0.816	0.44	0.920741	2.97909e-60	5.90068e-56
LGMN	0.34	0.088	0.905242	3.55711e-29	7.04558e-25
HOPX	0.302	0.03	0.90485	3.9622e-38	7.84793e-34
PYHIN1	0.807	0.528	0.895874	4.29369e-46	8.50451e-42
FCMR	0.882	0.685	0.895436	1.35977e-45	2.69329e-41
EFHD2	0.828	0.653	0.886752	1.17476e-55	2.32685e-51
MAF	0.804	0.492	0.884073	1.13481e-46	2.24771e-42
EVA1B	0.356	0.142	0.882154	1.32876e-21	2.63188e-17
LITAF	0.962	0.867	0.87803	2.6078e-61	5.16527e-57
IL2RG	0.995	0.97	0.872347	3.8237e-73	7.57361e-69
S1PR4	0.906	0.732	0.870827	1.97613e-54	3.91413e-50
ZEB2	0.575	0.218	0.870768	3.81598e-34	7.55831e-30
CD38	0.825	0.575	0.868923	1.71487e-42	3.39665e-38
CCL3	0.229	0.003	0.859387	3.266e-37	6.46897e-33
CYBA	0.998	0.988	0.851394	2.50246e-83	4.95662e-79
CKLF	0.868	0.723	0.848675	4.04082e-63	8.00365e-59
CLIC3	0.458	0.052	0.846675	6.81685e-56	1.35021e-51
IL10RA	0.818	0.491	0.845069	1.7301e-49	3.4268e-45
PTPRJ	0.87	0.644	0.831186	1.41078e-43	2.79432e-39
IL10	0.288	0.002	0.826592	7.98135e-50	1.58087e-45
S100A11	0.965	0.904	0.820024	6.83595e-40	1.354e-35
ATP2B4	0.762	0.445	0.816797	1.51073e-42	2.99229e-38
RUNX3	0.868	0.617	0.81533	1.74526e-46	3.45684e-42
TRAV13-1	0.309	0.174	0.813662	2.4979e-11	4.94759e-07
ARL6IP1	0.962	0.821	0.809068	7.5142e-54	1.48834e-49
XBP1	0.675	0.427	0.80358	2.16466e-39	4.28755e-35
IFI6	0.939	0.86	0.796828	1.27757e-37	2.53049e-33
SLFN5	0.807	0.637	0.796305	2.1706e-36	4.2993e-32
OSTF1	0.858	0.671	0.793281	7.71458e-56	1.52803e-51
ITGAL	0.774	0.516	0.792403	8.69657e-41	1.72253e-36
GALM	0.797	0.575	0.791341	2.30019e-46	4.55599e-42
S100A10	0.986	0.963	0.788084	1.54922e-41	3.06853e-37
CD4	0.837	0.71	0.77683	3.20132e-45	6.34085e-41
CD81	0.936	0.823	0.771812	2.25363e-53	4.46377e-49
PIP4K2A	0.807	0.573	0.768932	5.41432e-43	1.07241e-38
CRIP1	0.988	0.971	0.756607	9.22119e-37	1.82644e-32
SIT1	0.802	0.519	0.754387	1.84098e-44	3.64643e-40
MCTP2	0.462	0.047	0.74973	2.17e-59	4.29811e-55
CEP78	0.568	0.263	0.741984	1.33292e-39	2.64012e-35
CHST12	0.585	0.212	0.740927	5.70039e-48	1.12908e-43
IFI27L2	0.804	0.58	0.740828	2.80199e-43	5.54989e-39
SASH3	0.795	0.518	0.740593	2.86086e-42	5.66651e-38
PAM	0.691	0.444	0.740118	7.66206e-31	1.51762e-26
MIR4435-2HG	0.958	0.833	0.736918	4.71759e-38	9.34413e-34
UBALD2	0.962	0.917	0.730217	2.81548e-44	5.57663e-40
HNRNPLL	0.835	0.654	0.726034	1.68915e-33	3.34571e-29
TENT5C	0.917	0.774	0.725858	3.44633e-40	6.82615e-36
FLNA	0.908	0.791	0.72001	4.26699e-37	8.45163e-33
RAP1B	0.974	0.934	0.719487	8.4521e-55	1.67411e-50
SELPLG	0.882	0.744	0.717755	6.8523e-41	1.35723e-36
PLAAT4	0.953	0.946	0.709347	1.6283e-38	3.22517e-34
DTHD1	0.474	0.088	0.706743	2.41526e-46	4.78391e-42
AC004448.2	0.554	0.327	0.705342	1.11025e-16	2.19907e-12
ANTXR2	0.502	0.133	0.701008	1.15366e-42	2.28505e-38
ITGA4	0.896	0.815	0.693044	1.63608e-28	3.24059e-24
REEP5	0.866	0.663	0.691148	4.99852e-44	9.90056e-40
TMX4	0.7	0.447	0.691147	9.40607e-35	1.86306e-30
PIK3R5	0.715	0.433	0.690752	9.62722e-35	1.90686e-30
TGFBR3	0.717	0.513	0.683399	1.1316e-26	2.24135e-22
B4GALT1	0.715	0.462	0.682189	1.6826e-33	3.33272e-29
TRAF3IP3	0.868	0.713	0.68135	3.90232e-39	7.72933e-35
LBH	0.889	0.769	0.680907	2.42413e-33	4.80147e-29
ZBTB38	0.644	0.325	0.671567	2.01602e-37	3.99313e-33
APOBEC3H	0.476	0.147	0.67041	9.87687e-34	1.95631e-29
PPP1R18	0.906	0.761	0.670152	2.82577e-41	5.597e-37
CLIC1	0.993	0.961	0.664336	4.83183e-44	9.5704e-40
SKAP1	0.932	0.863	0.661671	7.41826e-34	1.46933e-29
CD53	0.943	0.862	0.660419	1.84945e-43	3.66321e-39
ERN1	0.578	0.331	0.660169	9.68494e-28	1.9183e-23
PPP3CA	0.509	0.18	0.65928	1.57362e-33	3.11687e-29
NEAT1	0.903	0.82	0.654858	4.23643e-23	8.39111e-19
DNAJC1	0.821	0.641	0.652657	1.15735e-31	2.29235e-27
S100A6	0.993	0.988	0.64979	4.27305e-26	8.46363e-22
PRKCQ	0.825	0.626	0.647149	4.19107e-31	8.30125e-27
LSP1	0.983	0.98	0.644748	1.99517e-43	3.95183e-39
CCR5	0.415	0.03	0.643628	3.55776e-57	7.04685e-53
SLC9A3R1	0.868	0.74	0.642132	9.61609e-36	1.90466e-31
CD99	0.991	0.98	0.63874	9.39313e-41	1.8605e-36
IL2RB	0.634	0.356	0.638403	1.20692e-33	2.39055e-29
RAB8B	0.693	0.476	0.63716	4.3956e-31	8.70636e-27
APBB1IP	0.922	0.808	0.636915	1.42593e-35	2.82435e-31
MSN	0.953	0.921	0.628506	7.13431e-38	1.41309e-33
SPPL2A	0.745	0.558	0.625761	2.27879e-32	4.5136e-28
GATA3	0.677	0.46	0.623259	5.50339e-24	1.09006e-19
NCALD	0.592	0.341	0.622927	1.50045e-22	2.97194e-18
LYST	0.861	0.755	0.620147	7.58809e-30	1.50297e-25
BST2	0.894	0.836	0.618165	1.76e-32	3.48604e-28
HLA-A	1	0.998	0.617695	1.9736e-53	3.90911e-49
RPS27L	0.835	0.74	0.615574	1.26262e-26	2.50086e-22
UBE2F	0.75	0.573	0.61405	7.09983e-28	1.40626e-23
AL138720.1	0.417	0.126	0.61358	2.53431e-28	5.01971e-24
PTPN4	0.514	0.207	0.610726	1.606e-30	3.181e-26
CHST11	0.778	0.55	0.609485	3.2864e-27	6.50937e-23
RAB27A	0.778	0.556	0.607797	1.04516e-28	2.07015e-24
GLIPR1	0.693	0.486	0.604952	1.03536e-25	2.05074e-21
RORA	0.866	0.766	0.603698	2.10181e-23	4.16306e-19
PBXIP1	0.816	0.659	0.60363	1.28025e-22	2.5358e-18
CX3CR1	0.285	0.013	0.601975	9.26138e-42	1.8344e-37
EMP3	0.965	0.931	0.601283	2.27417e-33	4.50445e-29
MRPL10	0.866	0.688	0.59996	1.65481e-29	3.27767e-25
SUB1	0.998	0.993	0.598507	5.55263e-42	1.09981e-37
PDCD1	0.58	0.337	0.598034	7.281e-21	1.44215e-16
THEMIS	0.54	0.359	0.597822	4.01471e-23	7.95193e-19
AKNA	0.637	0.437	0.597549	5.95577e-28	1.17966e-23
HLA-C	0.998	0.997	0.597341	1.37257e-43	2.71865e-39
ATXN7L1	0.592	0.332	0.596241	2.78981e-28	5.52577e-24
CCDC107	0.637	0.327	0.595029	6.89303e-33	1.3653e-28
TIMD4	0.307	0.049	0.594042	1.51587e-29	3.00248e-25
SLA2	0.45	0.15	0.593684	7.91866e-34	1.56845e-29
ARHGAP25	0.653	0.352	0.590664	2.53807e-28	5.02716e-24
DYNLL1	0.844	0.74	0.590142	1.47276e-24	2.91709e-20
HIST1H1D	0.79	0.794	0.589436	1.32042e-16	2.61535e-12
SPON2	0.45	0.256	0.588312	3.98774e-24	7.89851e-20
ADAM8	0.469	0.13	0.581299	3.62068e-36	7.17148e-32
RABGAP1L	0.913	0.847	0.581268	1.84244e-28	3.64932e-24
MYO5A	0.639	0.398	0.58092	1.06056e-27	2.10066e-23
APOBEC3C	0.698	0.474	0.57849	1.57322e-31	3.11608e-27
ERI1	0.443	0.143	0.577853	3.10738e-36	6.1548e-32
HACD4	0.759	0.59	0.577546	3.165e-31	6.26891e-27
CD2	0.953	0.922	0.576328	1.76712e-30	3.50013e-26
CORO7	0.84	0.713	0.573873	8.07442e-29	1.5993e-24
GABARAPL2	0.856	0.718	0.573339	6.85062e-32	1.3569e-27
PPIB	0.983	0.951	0.571883	1.97275e-26	3.90742e-22
ZYX	0.866	0.772	0.566486	1.50075e-27	2.97253e-23
IGF2R	0.634	0.427	0.566249	6.3825e-27	1.26418e-22
CDK2AP2	0.795	0.629	0.563101	1.0352e-22	2.05043e-18
ARHGAP10	0.406	0.093	0.562013	6.51731e-35	1.29088e-30
CDC42SE1	0.856	0.769	0.561651	1.33156e-28	2.63743e-24
RNF213	0.974	0.971	0.560447	1.523e-29	3.0166e-25
ETS1	0.969	0.96	0.559555	7.05916e-31	1.39821e-26
SP140	0.804	0.678	0.558937	6.00688e-28	1.18978e-23
SAMSN1	0.92	0.882	0.558436	1.10062e-19	2.18e-15
CORO1A	0.998	0.993	0.5576	1.05182e-41	2.08334e-37
ARL6IP5	0.939	0.884	0.557172	2.0198e-32	4.00062e-28
GGA2	0.483	0.239	0.556165	1.26404e-28	2.50369e-24
MYO1G	0.769	0.577	0.554929	5.34238e-28	1.05817e-23
HIST1H1E	0.929	0.924	0.554873	7.16959e-13	1.42008e-08
NPC1	0.465	0.223	0.554076	1.45863e-23	2.88911e-19
INPP5D	0.792	0.634	0.551967	3.2627e-23	6.46243e-19
FAM53B	0.495	0.197	0.551799	6.00579e-30	1.18957e-25
ANXA11	0.908	0.818	0.551422	1.12156e-29	2.22147e-25
ANXA4	0.557	0.315	0.550572	4.83025e-29	9.56727e-25
DAD1	0.851	0.796	0.549371	1.37543e-29	2.72432e-25
IFNG-AS1	0.368	0.089	0.549269	1.86537e-26	3.69473e-22
SH2D2A	0.729	0.536	0.549159	1.64914e-25	3.26644e-21
B2M	1	1	0.549043	1.22768e-80	2.43166e-76
DOK2	0.71	0.533	0.547053	6.8086e-29	1.34858e-24
PRR5	0.436	0.169	0.540204	9.87603e-29	1.95615e-24
ANXA1	0.825	0.853	0.538439	1.68317e-16	3.33385e-12
NCOA3	0.679	0.535	0.538023	1.35129e-21	2.6765e-17
PTPN22	0.752	0.621	0.536799	6.61155e-18	1.30955e-13
ACAA2	0.533	0.282	0.530385	4.17282e-30	8.2651e-26
RAB29	0.639	0.472	0.529527	7.8179e-26	1.54849e-21
MYL6	0.998	0.998	0.528686	2.7704e-42	5.48734e-38
GRK5	0.568	0.433	0.527489	7.07583e-18	1.40151e-13
KAT2B	0.502	0.239	0.525715	6.94456e-24	1.37551e-19
THEMIS2	0.415	0.121	0.522016	1.8459e-28	3.65617e-24
CAPNS1	0.882	0.818	0.521466	5.04078e-29	9.98427e-25
LINC02384	0.366	0.046	0.519595	3.87528e-41	7.67576e-37
CD79B	0.531	0.295	0.517304	1.65832e-24	3.28463e-20
DUSP4	0.639	0.506	0.515218	6.63003e-11	1.31321e-06
TPST2	0.578	0.351	0.514039	2.69892e-22	5.34575e-18
NFATC3	0.752	0.546	0.513938	1.54e-23	3.05028e-19
CLEC2B	0.884	0.825	0.513556	1.31889e-18	2.61233e-14
AUTS2	0.314	0.116	0.513349	6.33894e-17	1.25555e-12
RCSD1	0.863	0.718	0.510812	3.87089e-26	7.66707e-22
AC017002.3	0.354	0.113	0.510794	1.53387e-23	3.03814e-19
CLEC2D	0.901	0.786	0.508686	5.08729e-21	1.00764e-16
TAGAP	0.83	0.766	0.508508	8.10139e-12	1.60464e-07
TMBIM6	0.946	0.927	0.507509	6.29118e-25	1.24609e-20
C5orf56	0.762	0.582	0.50593	2.56634e-21	5.08315e-17
SPIDR	0.634	0.428	0.505813	1.61111e-20	3.19112e-16
YWHAQ	0.908	0.858	0.5057	3.0764e-26	6.09342e-22
NCF4	0.311	0.066	0.503927	4.54304e-26	8.9984e-22
LMAN2	0.797	0.639	0.498289	1.90489e-24	3.77301e-20
TMEM50A	0.941	0.889	0.498067	1.01921e-26	2.01874e-22
AC015849.1	0.29	0.022	0.49757	1.8468e-36	3.65795e-32
SUN2	0.785	0.671	0.494957	6.85417e-22	1.35761e-17
CDKN2A	0.382	0.121	0.494746	1.2824e-24	2.54004e-20
TERF2IP	0.884	0.804	0.494413	2.32922e-24	4.61348e-20
CD58	0.583	0.288	0.494396	3.36888e-25	6.67274e-21
VAMP5	0.842	0.713	0.493626	1.82021e-20	3.6053e-16
IRF2	0.545	0.344	0.493029	6.25797e-24	1.23952e-19
ZNF652	0.382	0.096	0.489626	2.52353e-30	4.99836e-26
PICALM	0.689	0.53	0.489187	3.78585e-18	7.49864e-14
TRBC2	0.908	0.838	0.489103	6.15287e-14	1.2187e-09
BAX	0.821	0.776	0.488476	7.7971e-19	1.54437e-14
GTDC1	0.519	0.31	0.487757	1.26181e-18	2.49927e-14
STK10	0.804	0.708	0.486723	1.02992e-22	2.03997e-18
TNFSF9	0.281	0.042	0.484173	9.02286e-28	1.78716e-23
AKIRIN2	0.613	0.46	0.483768	1.32133e-20	2.61717e-16
ADAM19	0.524	0.253	0.483267	1.06886e-21	2.1171e-17
TMEM173	0.639	0.503	0.483199	3.40855e-20	6.75132e-16
RAP1A	0.835	0.737	0.482898	6.69826e-25	1.32672e-20
SRPK2	0.868	0.776	0.482443	1.78796e-21	3.54141e-17
IRF4	0.472	0.29	0.480954	1.35758e-14	2.68895e-10
NUDT16	0.517	0.346	0.480584	3.33238e-14	6.60044e-10
GBP5	0.79	0.72	0.479601	2.6958e-11	5.33956e-07
SMAD7	0.488	0.322	0.478961	2.0721e-15	4.1042e-11
WHRN	0.342	0.094	0.478859	9.41084e-24	1.864e-19
ABHD17A	0.934	0.889	0.477942	1.75076e-22	3.46772e-18
SYTL3	0.663	0.548	0.476707	1.87037e-14	3.70464e-10
SDF4	0.665	0.524	0.468837	2.25605e-22	4.46856e-18
HIST1H1C	0.877	0.867	0.468714	2.5118e-14	4.97512e-10
SH3BGRL3	1	1	0.46775	1.59732e-29	3.16381e-25
GIMAP4	0.847	0.769	0.466632	5.35027e-18	1.05973e-13
P4HB	0.736	0.653	0.464176	3.91103e-22	7.74658e-18
VAMP8	0.92	0.865	0.463529	2.41924e-24	4.79179e-20
TPP1	0.552	0.327	0.463434	1.48985e-19	2.95094e-15
UCP2	0.969	0.96	0.46276	1.55519e-15	3.08037e-11
GDE1	0.443	0.255	0.461246	7.54669e-18	1.49477e-13
CDC25B	0.658	0.516	0.460702	7.07861e-21	1.40206e-16
MXD4	0.875	0.816	0.460054	8.41449e-17	1.66666e-12
ADAP1	0.42	0.155	0.45996	8.3121e-24	1.64638e-19
CD2BP2	0.606	0.391	0.459328	8.47256e-24	1.67816e-19
CFLAR	0.863	0.799	0.459116	1.0142e-18	2.00884e-14
CD69	0.972	0.973	0.45822	5.32954e-09	0.000105562
LIMD2	0.998	0.995	0.458097	1.27369e-25	2.5228e-21
DHRS7	0.616	0.43	0.458	1.60768e-21	3.18433e-17
LAIR2	0.283	0.096	0.456816	1.00515e-14	1.99091e-10
LAPTM5	0.993	0.987	0.456524	9.69591e-22	1.92047e-17
CD3D	0.993	0.995	0.456372	2.68061e-24	5.30949e-20
NT5C	0.679	0.543	0.456217	1.27108e-19	2.51762e-15
CARHSP1	0.755	0.669	0.453016	6.43104e-18	1.2738e-13
CBLB	0.955	0.951	0.452577	3.7815e-15	7.49002e-11
CCNH	0.816	0.757	0.452016	6.55356e-11	1.29806e-06
PAXX	0.745	0.597	0.451043	5.64977e-19	1.11905e-14
YPEL3	0.875	0.806	0.450714	1.9657e-14	3.89345e-10
CALM1	1	1	0.447345	8.14082e-30	1.61245e-25
CDC42EP3	0.396	0.143	0.446977	4.91316e-22	9.7315e-18
ATG5	0.616	0.482	0.446936	2.96843e-22	5.87957e-18
NSF	0.491	0.315	0.445764	1.97324e-16	3.9084e-12
ARHGAP30	0.795	0.669	0.441601	2.40307e-20	4.75976e-16
CD3E	0.991	0.997	0.44134	1.82513e-31	3.61504e-27
TAOK3	0.8	0.727	0.438156	1.27801e-21	2.53136e-17
SYNRG	0.632	0.455	0.437929	1.86421e-17	3.69245e-13
SHISA5	0.816	0.722	0.437912	9.75651e-19	1.93247e-14
SLAMF1	0.392	0.17	0.437855	4.84495e-20	9.59639e-16
ITGB2	0.922	0.89	0.437702	1.10442e-13	2.18752e-09
CAP1	0.96	0.895	0.437315	1.45143e-20	2.87485e-16
WIPF1	0.958	0.929	0.435435	7.57427e-19	1.50024e-14
PYCARD	0.8	0.705	0.434556	3.96261e-18	7.84874e-14
IGKV3OR2-268	0.276	0.052	0.434127	2.25684e-26	4.47011e-22
LY6E	0.993	0.99	0.430868	3.34496e-19	6.62536e-15
ISG20	0.981	0.978	0.429386	3.49166e-17	6.91594e-13
POU2AF1	0.384	0.126	0.427683	1.43966e-22	2.85154e-18
SCAMP2	0.705	0.556	0.427121	4.86937e-17	9.64477e-13
DUSP5	0.608	0.472	0.426565	2.22969e-12	4.41635e-08
LIMS1	0.896	0.806	0.425297	1.11697e-13	2.21238e-09
MZB1	0.269	0.034	0.425196	2.7758e-29	5.49802e-25
RUNX2	0.415	0.228	0.425179	2.39586e-15	4.74547e-11
GNB2	0.887	0.845	0.425154	2.12234e-23	4.20371e-19
ZAP70	0.842	0.799	0.424731	2.69972e-19	5.34733e-15
CD44	0.96	0.951	0.424401	1.34814e-15	2.67026e-11
PCID2	0.498	0.314	0.424139	8.03279e-17	1.59106e-12
ZDHHC14	0.264	0.02	0.422022	1.78968e-34	3.54481e-30
PSMB10	0.962	0.933	0.421182	4.74782e-19	9.404e-15
PTK2B	0.54	0.378	0.419837	1.17629e-18	2.32988e-14
SDF2L1	0.469	0.336	0.418521	1.35885e-15	2.69148e-11
CD3G	0.958	0.953	0.418126	2.36651e-19	4.68735e-15
HLA-F	0.809	0.663	0.418014	1.48205e-14	2.9355e-10
NELFCD	0.623	0.433	0.41767	5.49587e-19	1.08857e-14
RNASEK	0.967	0.951	0.417561	9.56052e-21	1.89365e-16
CD47	0.858	0.811	0.41595	5.47599e-20	1.08463e-15
ACTR3	0.915	0.902	0.415806	2.87738e-18	5.69922e-14
CASP1	0.512	0.358	0.415328	1.58495e-15	3.13931e-11
FKBP11	0.483	0.366	0.415035	2.94586e-14	5.83486e-10
RABAC1	0.788	0.718	0.414977	3.76341e-17	7.45419e-13
DUSP16	0.519	0.329	0.414586	5.94576e-15	1.17768e-10
TXN	0.936	0.902	0.414544	1.23991e-13	2.45588e-09
GK5	0.304	0.086	0.413079	1.77822e-22	3.52212e-18
CTSW	0.208	0.04	0.413012	6.52129e-17	1.29167e-12
NMRK1	0.613	0.489	0.412939	1.16021e-14	2.29802e-10
PTGER2	0.33	0.105	0.412902	1.69521e-20	3.3577e-16
FNDC3B	0.333	0.123	0.412563	5.14738e-20	1.01954e-15
CTSD	0.741	0.619	0.412558	1.5673e-16	3.10435e-12
SAMD9L	0.521	0.337	0.412482	9.2775e-14	1.83759e-09
PHLDA1	0.38	0.212	0.412351	1.29216e-15	2.55939e-11
HERC5	0.552	0.435	0.411828	3.06115e-12	6.06321e-08
SYNE1	0.667	0.545	0.410865	4.35736e-17	8.63063e-13
ARHGAP9	0.797	0.693	0.409867	3.56069e-15	7.05265e-11
PPP1CA	0.972	0.963	0.409691	1.27919e-22	2.53369e-18
HERPUD1	0.637	0.508	0.409591	1.62546e-13	3.21955e-09
PSAP	0.828	0.764	0.409486	7.22971e-18	1.43199e-13
LBR	0.715	0.609	0.407536	1.78191e-17	3.52943e-13
CYTOR	0.915	0.86	0.40618	2.1611e-13	4.28048e-09
CD63	0.55	0.401	0.405819	5.50237e-20	1.08985e-15
ATP5IF1	0.967	0.951	0.405262	1.84607e-17	3.6565e-13
DOCK8	0.816	0.74	0.405041	1.47242e-16	2.91641e-12
TSPAN5	0.465	0.305	0.404508	4.60459e-15	9.1203e-11
PTPRCAP	0.993	0.992	0.403643	1.07832e-19	2.13582e-15
PGAM1	0.901	0.89	0.402933	3.20243e-16	6.34305e-12
CD320	0.389	0.27	0.402248	6.54655e-18	1.29667e-13
RPTOR	0.491	0.324	0.402113	7.28605e-17	1.44315e-12
ARPC1B	0.998	0.99	0.401672	1.05695e-23	2.0935e-19
ABI3	0.295	0.084	0.400966	1.74229e-23	3.45095e-19
SPCS2	0.769	0.696	0.400933	2.74898e-16	5.4449e-12
RORA-AS1	0.519	0.427	0.400701	4.90332e-11	9.712e-07
NIBAN1	0.675	0.445	0.399823	6.95779e-13	1.37813e-08
CACYBP	0.84	0.789	0.399156	9.25864e-15	1.83386e-10
RGS19	0.59	0.427	0.397497	4.04418e-16	8.01031e-12
CAPN2	0.729	0.648	0.397408	2.58047e-18	5.11114e-14
HDAC7	0.5	0.302	0.394917	6.55476e-17	1.2983e-12
LCK	0.981	0.943	0.394227	1.57321e-18	3.11607e-14
ATXN1	0.882	0.853	0.393977	1.04939e-14	2.07852e-10
RNF167	0.726	0.578	0.393464	3.10955e-16	6.15909e-12
AL157402.2	0.41	0.239	0.392424	5.33534e-16	1.05677e-11
ARL15	0.488	0.376	0.391954	5.8075e-12	1.15029e-07
SQSTM1	0.748	0.683	0.391694	1.96173e-12	3.88561e-08
CCDC167	0.764	0.661	0.391269	6.56677e-16	1.30068e-11
SPN	0.677	0.501	0.390102	1.43203e-15	2.83642e-11
DEF6	0.814	0.75	0.389859	1.02789e-18	2.03594e-14
RASAL3	0.665	0.535	0.388545	8.9303e-16	1.76882e-11
SEC11C	0.693	0.631	0.387873	4.2834e-18	8.48414e-14
CD300A	0.373	0.162	0.387695	4.66186e-18	9.23375e-14
CLTA	0.807	0.745	0.386541	5.27245e-16	1.04431e-11
TBC1D10C	0.87	0.794	0.384779	1.87697e-15	3.71772e-11
C17orf49	0.863	0.825	0.382646	5.78278e-13	1.1454e-08
RNF166	0.578	0.45	0.3819	1.82413e-14	3.61305e-10
NCOA1	0.618	0.438	0.381198	2.44989e-12	4.85249e-08
SPATS2L	0.535	0.418	0.380485	1.32682e-12	2.62804e-08
CUTA	0.915	0.882	0.380476	2.53571e-15	5.02248e-11
GIMAP7	0.887	0.841	0.380078	1.27388e-11	2.52317e-07
PPP1R12A	0.854	0.784	0.380053	2.46207e-15	4.87663e-11
OGA	0.79	0.75	0.379819	1.35142e-12	2.67676e-08
RAB1B	0.755	0.707	0.379461	3.51584e-18	6.96383e-14
LAIR1	0.29	0.081	0.379455	5.29891e-18	1.04956e-13
MRFAP1L1	0.498	0.352	0.379434	3.0975e-19	6.13522e-15
CERK	0.483	0.342	0.377345	1.13885e-13	2.25572e-09
BIN2	0.858	0.784	0.376298	9.53405e-13	1.88841e-08
TC2N	0.759	0.685	0.375069	1.22795e-10	2.43221e-06
C1GALT1	0.507	0.32	0.375041	4.82462e-17	9.55612e-13
NOP10	0.899	0.841	0.374653	2.01458e-15	3.99027e-11
PPP1R16B	0.729	0.705	0.374618	2.0561e-14	4.07251e-10
AC007384.1	0.406	0.226	0.371351	4.76084e-12	9.42979e-08
CHMP2A	0.762	0.666	0.370172	1.70283e-12	3.3728e-08
CCR1	0.224	0.003	0.36949	5.23293e-36	1.03649e-31
TM9SF2	0.741	0.626	0.369307	7.39971e-14	1.46566e-09
TMEM59	0.901	0.843	0.369024	5.5491e-16	1.09911e-11
DIAPH1	0.696	0.644	0.36866	2.62938e-16	5.20802e-12
BTG3	0.599	0.543	0.367401	3.02247e-13	5.98661e-09
CAST	0.83	0.755	0.366956	4.59867e-14	9.10859e-10
PHTF2	0.656	0.533	0.365422	2.19104e-13	4.3398e-09
SERPINB9	0.653	0.578	0.365345	3.47979e-12	6.89242e-08
NFATC2	0.778	0.698	0.365333	2.84832e-12	5.64166e-08
PRDX5	0.851	0.821	0.365304	1.10207e-18	2.18287e-14
TNFRSF4	0.403	0.261	0.364972	1.37484e-07	0.00272315
MANF	0.37	0.241	0.364728	1.00578e-14	1.99215e-10
DOCK11	0.587	0.467	0.364024	4.19807e-13	8.31512e-09
CAT	0.528	0.351	0.363791	2.17671e-13	4.31142e-09
OAS1	0.627	0.492	0.363211	2.12169e-10	4.20243e-06
PHF21A	0.46	0.288	0.362925	6.44531e-12	1.27662e-07
KRTCAP2	0.917	0.902	0.362352	4.71215e-18	9.33335e-14
PTPN18	0.608	0.503	0.362034	1.24608e-15	2.4681e-11
PREX1	0.849	0.794	0.359552	3.45788e-12	6.84902e-08
ABI1	0.769	0.737	0.357777	3.56844e-16	7.06801e-12
SNX17	0.712	0.621	0.35742	3.37683e-15	6.68849e-11
ISG15	0.96	0.938	0.357346	2.87297e-09	5.69049e-05
WWOX	0.45	0.325	0.356906	2.81893e-09	5.58345e-05
GNAI2	0.988	0.978	0.356891	6.29153e-19	1.24616e-14
HSPB11	0.691	0.585	0.355464	2.09628e-15	4.15209e-11
PARP8	0.755	0.703	0.355023	7.23648e-10	1.43333e-05
LCP2	0.769	0.695	0.353858	6.61888e-13	1.311e-08
ARHGAP26	0.45	0.339	0.353828	1.41239e-13	2.79753e-09
ARL4C	0.981	0.966	0.353559	1.88764e-12	3.73886e-08
GNPTAB	0.476	0.337	0.353106	1.81451e-13	3.594e-09
YARS	0.823	0.737	0.351903	2.15211e-11	4.26268e-07
MAT2B	0.724	0.624	0.351184	6.49054e-12	1.28558e-07
ACTR2	0.948	0.944	0.350881	1.06431e-15	2.10808e-11
RASGRP2	0.726	0.651	0.349389	2.81439e-13	5.57447e-09
DCP2	0.639	0.535	0.349177	2.25564e-13	4.46774e-09
ITFG1	0.667	0.583	0.349035	6.0741e-12	1.2031e-07
ARRB2	0.75	0.718	0.348797	1.65729e-14	3.2826e-10
TMED10	0.703	0.634	0.347846	8.90104e-17	1.76303e-12
LCP1	0.969	0.951	0.347442	1.19655e-12	2.37001e-08
SLF1	0.373	0.177	0.346241	2.15928e-17	4.27688e-13
GBP2	0.887	0.88	0.344664	2.52585e-13	5.00296e-09
OAZ1	0.991	0.99	0.344025	2.54713e-17	5.0451e-13
XIST	0.358	0.159	0.343053	2.13037e-13	4.21962e-09
PBDC1	0.535	0.4	0.3428	5.21627e-12	1.03319e-07
POU2F2	0.377	0.221	0.342476	1.71509e-10	3.39708e-06
VCP	0.847	0.811	0.342214	6.00896e-15	1.1902e-10
STK24	0.814	0.804	0.341703	2.96477e-15	5.87231e-11
CTSS	0.682	0.589	0.340442	1.98565e-11	3.93298e-07
VAMP4	0.446	0.265	0.340334	4.17035e-14	8.26021e-10
LIM2	0.139	0.002	0.340253	3.36567e-22	6.66639e-18
SYNGR2	0.686	0.636	0.339798	1.67963e-11	3.32684e-07
DRAP1	0.946	0.933	0.33893	3.09017e-14	6.1207e-10
WDR1	0.868	0.853	0.338348	4.44463e-13	8.80348e-09
PCBP1	0.71	0.604	0.338214	1.92924e-12	3.82124e-08
AFTPH	0.521	0.391	0.337867	8.50901e-13	1.68538e-08
COX17	0.71	0.6	0.337808	9.60641e-12	1.90274e-07
SLAMF6	0.505	0.369	0.337646	1.87979e-11	3.7233e-07
ANKRD39	0.538	0.428	0.33592	1.979e-14	3.9198e-10
MBNL2	0.377	0.187	0.335371	3.59355e-13	7.11774e-09
APMAP	0.491	0.339	0.334702	2.96076e-13	5.86438e-09
ZBTB8OS	0.545	0.423	0.334501	5.59986e-16	1.10917e-11
KIF13B	0.408	0.233	0.333535	3.43883e-12	6.81128e-08
PLCL1	0.241	0.207	0.333009	1.09403e-06	0.0216695
LIME1	0.939	0.949	0.332791	1.19583e-10	2.36857e-06
TMED9	0.66	0.616	0.332773	1.67628e-16	3.3202e-12
TEX264	0.639	0.526	0.332693	6.03254e-12	1.19487e-07
PRR13	0.934	0.927	0.332142	5.52097e-14	1.09354e-09
AL390957.1	0.271	0.093	0.332027	3.16832e-15	6.27549e-11
KLF6	0.965	0.956	0.332022	2.20886e-07	0.0043751
METRNL	0.229	0.046	0.331884	2.33726e-19	4.62942e-15
PIM2	0.675	0.619	0.331421	4.32397e-09	8.56448e-05
SAMD9	0.554	0.413	0.330522	3.98651e-10	7.89608e-06
TNFRSF18	0.25	0.091	0.329954	4.72192e-12	9.3527e-08
RAC2	0.998	0.992	0.329605	8.40411e-16	1.6646e-11
FAM117A	0.427	0.278	0.328869	9.13722e-11	1.80981e-06
ARPC3	0.993	0.995	0.328175	2.52899e-19	5.00917e-15
OPTN	0.863	0.815	0.327782	6.42697e-10	1.27299e-05
UBB	0.974	0.985	0.327668	1.0108e-13	2.0021e-09
MAD1L1	0.514	0.379	0.327603	1.93268e-11	3.82806e-07
SP100	0.91	0.916	0.327156	1.46888e-12	2.90941e-08
SSR4	0.95	0.943	0.326873	1.13848e-11	2.25499e-07
PIGT	0.509	0.43	0.326751	8.13517e-14	1.61133e-09
NCOR1	0.84	0.821	0.326741	1.26729e-12	2.51013e-08
FMNL1	0.738	0.658	0.326555	4.06417e-10	8.0499e-06
SGMS1	0.45	0.265	0.325746	3.05917e-11	6.05929e-07
UBE2E3	0.498	0.398	0.325127	9.6401e-12	1.90942e-07
TUT7	0.606	0.518	0.325049	5.2095e-10	1.03185e-05
HSH2D	0.568	0.491	0.325047	4.24592e-13	8.4099e-09
LINC00861	0.611	0.582	0.324752	3.81176e-09	7.54994e-05
GNG2	0.873	0.836	0.324551	2.47423e-10	4.9007e-06
SEC11A	0.882	0.826	0.324069	1.40718e-13	2.7872e-09
MESD	0.498	0.356	0.323974	3.62742e-12	7.18483e-08
SH3GLB1	0.686	0.604	0.323514	1.79027e-11	3.546e-07
ACAP2	0.781	0.755	0.323334	1.36666e-13	2.70695e-09
TSC22D4	0.616	0.496	0.323245	4.02518e-12	7.97268e-08
RAB10	0.597	0.514	0.322843	1.96978e-13	3.90154e-09
TRBC1	0.604	0.573	0.322445	3.2208e-08	0.000637944
SRGN	0.995	0.997	0.322389	1.84074e-09	3.64596e-05
MT-ND6	0.929	0.951	0.322078	1.00757e-06	0.0199569
VCL	0.285	0.103	0.321321	4.94067e-16	9.78599e-12
DDAH2	0.281	0.113	0.320931	8.0756e-13	1.59953e-08
ARL6IP6	0.415	0.263	0.32064	6.54505e-12	1.29638e-07
SNX2	0.642	0.548	0.319494	7.39284e-11	1.4643e-06
SELENOT	0.771	0.703	0.319131	1.28101e-12	2.53729e-08
ADK	0.729	0.71	0.318903	5.6692e-12	1.1229e-07
PSENEN	0.597	0.459	0.318689	1.35649e-10	2.6868e-06
TBX21	0.347	0.201	0.318007	4.99733e-12	9.89821e-08
SEC61B	0.95	0.949	0.317755	7.96313e-12	1.57726e-07
CLN3	0.422	0.268	0.317413	7.01954e-12	1.39036e-07
LAX1	0.356	0.202	0.317189	3.6132e-11	7.15666e-07
GALNT10	0.333	0.172	0.316799	6.4037e-12	1.26838e-07
NCOA2	0.625	0.556	0.316468	1.20053e-09	2.37789e-05
NAA50	0.682	0.577	0.316214	7.32687e-11	1.45123e-06
IQGAP1	0.892	0.879	0.315917	1.34277e-14	2.65963e-10
NDUFC2	0.936	0.907	0.314994	1.50783e-13	2.98655e-09
C11orf98	0.653	0.541	0.314985	1.15355e-12	2.28484e-08
SEC61G	0.946	0.956	0.314965	2.70438e-12	5.35656e-08
MFSD10	0.545	0.442	0.314719	1.14537e-10	2.26864e-06
SIRT2	0.542	0.417	0.314647	8.08733e-13	1.60186e-08
SLFN12L	0.528	0.423	0.314531	6.0571e-10	1.19973e-05
TPM4	0.804	0.804	0.313751	3.72051e-11	7.36921e-07
M6PR	0.667	0.622	0.313498	1.52107e-13	3.01279e-09
LRBA	0.797	0.774	0.313379	1.29197e-09	2.55901e-05
CASK	0.521	0.398	0.313051	3.15237e-08	0.000624391
RFX3-AS1	0.292	0.15	0.312722	1.07123e-11	2.12178e-07
NDUFS2	0.741	0.654	0.312175	2.469e-12	4.89036e-08
PSTPIP1	0.524	0.383	0.311851	1.31647e-09	2.60752e-05
TSPO	0.936	0.934	0.311841	1.00975e-13	2.00002e-09
GCH1	0.531	0.452	0.311768	1.68897e-11	3.34534e-07
ZSWIM6	0.474	0.352	0.311378	1.42592e-10	2.82432e-06
TMOD3	0.752	0.725	0.311348	5.20581e-16	1.03112e-11
TRAC	0.649	0.612	0.311242	5.49616e-09	0.000108862
SP140L	0.634	0.521	0.310644	9.94455e-10	1.96972e-05
FLI1	0.606	0.509	0.3101	1.02838e-10	2.03692e-06
ARNTL	0.493	0.364	0.309953	8.9945e-12	1.78154e-07
TRIB1	0.292	0.147	0.309873	6.30741e-11	1.24931e-06
STK4	0.896	0.875	0.309567	7.54777e-11	1.49499e-06
APPL2	0.483	0.359	0.309351	3.44889e-08	0.000683121
TMCO1	0.66	0.565	0.309324	7.60364e-12	1.50605e-07
ZNRD1	0.611	0.511	0.30917	2.5144e-11	4.98027e-07
WSB2	0.462	0.305	0.309143	3.90942e-10	7.74338e-06
COMMD3	0.55	0.411	0.3087	1.20123e-10	2.37928e-06
ITGB7	0.568	0.514	0.308369	5.01191e-12	9.92709e-08
EPS15	0.684	0.617	0.308199	2.75217e-09	5.45123e-05
MYDGF	0.66	0.636	0.307852	4.57448e-13	9.06066e-09
OASL	0.528	0.432	0.307269	7.01886e-08	0.00139022
RSRP1	0.854	0.801	0.307118	3.22349e-08	0.000638476
ZC3H13	0.533	0.395	0.306211	1.6196e-10	3.20795e-06
RNF214	0.347	0.228	0.306206	1.0035e-09	1.98763e-05
OSBPL3	0.417	0.288	0.305884	2.25122e-12	4.45899e-08
CCR2	0.219	0.017	0.304883	8.83034e-27	1.74903e-22
AP2S1	0.837	0.811	0.304802	3.15449e-14	6.2481e-10
MKNK2	0.663	0.575	0.304785	6.99992e-10	1.38647e-05
BUB3	0.741	0.673	0.304755	1.89939e-13	3.76212e-09
TSPAN32	0.231	0.079	0.304485	1.85183e-14	3.66791e-10
FERMT3	0.698	0.622	0.303397	2.23646e-10	4.42976e-06
AC243960.1	0.545	0.492	0.303389	1.56293e-09	3.0957e-05
PDIA6	0.693	0.654	0.303312	8.29979e-12	1.64394e-07
VPS25	0.486	0.351	0.303247	1.71153e-12	3.39003e-08
DYNLRB1	0.733	0.659	0.303045	1.58545e-09	3.1403e-05
NDUFB10	0.894	0.877	0.302177	9.6354e-14	1.90848e-09
TRAV38-1	0.229	0.103	0.301664	3.39259e-07	0.00671969
PSMB8	0.934	0.938	0.301611	1.04745e-12	2.07469e-08
TWF2	0.743	0.71	0.301456	8.42995e-13	1.66972e-08
VASP	0.611	0.513	0.300692	2.44275e-11	4.83836e-07
GABARAP	0.979	0.968	0.300076	1.35529e-10	2.68442e-06
MACF1	0.764	0.739	0.299973	4.49961e-09	8.91237e-05
FOXN3	0.816	0.82	0.299742	6.40526e-12	1.26869e-07
ATP6V1G1	0.946	0.954	0.299355	3.66146e-12	7.25225e-08
ADAM17	0.453	0.319	0.299191	3.09113e-12	6.12261e-08
TRANK1	0.507	0.408	0.298936	8.64908e-10	1.71312e-05
RASSF3	0.453	0.376	0.298818	3.39046e-10	6.71548e-06
CCDC88C	0.715	0.715	0.298783	4.32219e-13	8.56097e-09
PTPN2	0.774	0.722	0.298711	9.91717e-11	1.96429e-06
DECR1	0.835	0.766	0.298391	8.90665e-09	0.000176414
CD28	0.818	0.803	0.298272	2.07525e-10	4.11045e-06
RNF157	0.236	0.029	0.298141	2.70912e-24	5.36595e-20
FAM214A	0.573	0.489	0.298007	9.30518e-09	0.000184308
CPB2-AS1	0.375	0.261	0.297844	1.00184e-11	1.98435e-07
IL12RB1	0.483	0.339	0.297705	8.40189e-11	1.66416e-06
RPA2	0.488	0.327	0.297599	5.93334e-10	1.17522e-05
AC006369.1	0.276	0.13	0.2971	3.8071e-11	7.54073e-07
TYMP	0.63	0.538	0.297	2.7739e-07	0.00549426
ATP6V1C1	0.328	0.177	0.296909	1.53529e-14	3.04095e-10
ARL3	0.309	0.162	0.296857	1.9824e-11	3.92655e-07
ATP6V1B2	0.432	0.287	0.296734	1.48531e-09	2.94195e-05
TNFSF12	0.434	0.305	0.296372	2.41e-09	4.77348e-05
MGAT1	0.441	0.297	0.295943	9.60304e-11	1.90207e-06
ARID5B	0.932	0.926	0.295674	9.99591e-09	0.000197989
SRI	0.762	0.683	0.295394	6.4162e-10	1.27086e-05
CARD16	0.814	0.767	0.295316	2.69399e-10	5.33598e-06
RAB5IF	0.764	0.712	0.294517	5.24044e-12	1.03797e-07
TBK1	0.45	0.298	0.29443	4.87321e-10	9.65237e-06
ITM2B	0.986	0.997	0.293873	9.90826e-09	0.000196253
CD164	0.825	0.769	0.293789	3.1332e-10	6.20594e-06
BLZF1	0.307	0.14	0.293561	1.66505e-11	3.29796e-07
RIPOR2	0.861	0.847	0.293054	5.19607e-09	0.000102919
ATOX1	0.634	0.553	0.292983	1.53646e-10	3.04328e-06
USO1	0.417	0.295	0.292594	8.24413e-14	1.63291e-09
ATP6V0E1	0.877	0.857	0.292527	1.25889e-11	2.49348e-07
KDM7A	0.677	0.607	0.292333	1.35969e-07	0.00269314
CD27	0.899	0.922	0.29185	1.29939e-09	2.5737e-05
AC004687.1	0.307	0.182	0.291773	7.47018e-11	1.47962e-06
KLRG1	0.292	0.221	0.291142	1.54448e-09	3.05915e-05
CSK	0.873	0.831	0.29061	9.47739e-10	1.87719e-05
SH3KBP1	0.892	0.879	0.290287	2.63577e-09	5.22067e-05
DENND2D	0.644	0.59	0.290252	6.61143e-08	0.00130953
ANXA5	0.785	0.786	0.290086	4.24351e-09	8.40511e-05
LPXN	0.762	0.69	0.289923	1.66958e-10	3.30693e-06
RGS9	0.184	0.022	0.289481	2.71926e-20	5.38604e-16
RASSF5	0.693	0.617	0.289381	2.99421e-09	5.93064e-05
UPF3A	0.675	0.609	0.28918	7.54797e-08	0.00149503
PTPRC	0.983	0.997	0.289086	1.81453e-15	3.59404e-11
SEM1	0.934	0.912	0.288994	1.32524e-10	2.62489e-06
ARHGEF12	0.226	0.042	0.288989	1.10433e-18	2.18735e-14
NEDD9	0.5	0.444	0.288834	7.77928e-07	0.0154084
CREB1	0.604	0.541	0.288666	2.41193e-10	4.77732e-06
JARID2	0.689	0.616	0.288603	5.42359e-08	0.00107425
PARP4	0.514	0.406	0.288599	4.47866e-09	8.87088e-05
RASA2	0.858	0.86	0.288359	2.97626e-09	5.89507e-05
BAK1	0.505	0.379	0.287742	6.79405e-11	1.3457e-06
GAS7	0.2	0.067	0.287653	6.00711e-11	1.18983e-06
PSMB9	0.974	0.958	0.28758	4.55902e-11	9.03005e-07
ARPC2	0.995	0.992	0.287577	5.10995e-14	1.01213e-09
PMVK	0.547	0.486	0.287568	2.09896e-12	4.15741e-08
LRMP	0.552	0.479	0.287547	1.91248e-06	0.0378805
IBTK	0.566	0.46	0.287501	2.13615e-09	4.23107e-05
GEMIN7	0.408	0.263	0.287467	1.08384e-09	2.14676e-05
LMO4	0.342	0.17	0.287429	3.75458e-11	7.4367e-07
MPST	0.375	0.234	0.287222	4.85506e-11	9.61642e-07
MYH9	0.955	0.96	0.286932	1.10183e-07	0.0021824
PPP5C	0.403	0.251	0.286833	2.2599e-12	4.47618e-08
KRAS	0.724	0.73	0.286798	6.69814e-13	1.3267e-08
TRPC4AP	0.597	0.514	0.286648	2.83152e-11	5.6084e-07
SPTY2D1	0.469	0.371	0.286415	7.9794e-11	1.58048e-06
STAT4	0.658	0.637	0.286368	2.54153e-07	0.00503402
COPZ1	0.724	0.624	0.285804	4.20138e-10	8.32168e-06
MGME1	0.274	0.067	0.285722	7.59857e-19	1.50505e-14
IGFLR1	0.483	0.442	0.285228	2.09845e-07	0.00415639
COX8A	0.983	0.965	0.284337	6.67017e-08	0.00132116
ANKRD44	0.804	0.808	0.283413	5.48831e-11	1.08707e-06
PCBD1	0.526	0.457	0.283271	3.57474e-11	7.08048e-07
RASGRP1	0.63	0.602	0.283223	2.02266e-10	4.00628e-06
EXOC4	0.599	0.528	0.283128	3.45376e-09	6.84086e-05
TMBIM4	0.8	0.757	0.283036	1.68468e-11	3.33685e-07
HMOX1	0.186	0.019	0.283005	1.75076e-20	3.46773e-16
ST8SIA4	0.427	0.298	0.282379	1.93039e-08	0.000382353
POLD4	0.858	0.809	0.282172	2.06452e-08	0.000408919
INSIG1	0.568	0.53	0.282048	4.08189e-11	8.08501e-07
BANP	0.358	0.211	0.281831	1.99232e-10	3.94619e-06
EDARADD	0.175	0.061	0.281692	4.24849e-10	8.41499e-06
WNK1	0.703	0.656	0.28167	5.99973e-09	0.000118837
CD52	1	1	0.281418	2.84855e-09	5.64213e-05
CTSA	0.505	0.482	0.28125	1.5495e-11	3.06909e-07
CD86	0.179	0	0.281241	2.66285e-32	5.2743e-28
LASP1	0.538	0.454	0.280999	3.61009e-10	7.15051e-06
RAP1GAP2	0.321	0.191	0.280934	6.8323e-09	0.000135327
PDCD10	0.642	0.55	0.280835	1.14803e-09	2.2739e-05
AC105446.1	0.224	0.061	0.280226	1.5857e-16	3.14079e-12
GIMAP1	0.618	0.565	0.280053	1.0337e-07	0.00204745
ITM2C	0.276	0.15	0.280007	1.14068e-08	0.000225935
VTI1A	0.517	0.447	0.279743	1.16493e-08	0.000230738
SEPTIN11	0.377	0.251	0.27969	2.02428e-11	4.00949e-07
TMEM179B	0.715	0.653	0.279587	1.73157e-10	3.42972e-06
PSMD4	0.788	0.72	0.279053	8.59641e-10	1.70269e-05
TRAF5	0.417	0.3	0.278904	8.2757e-11	1.63917e-06
EVL	0.965	0.983	0.27869	3.4701e-10	6.87322e-06
GRK2	0.698	0.626	0.278424	1.75266e-08	0.00034715
UBL5	0.974	0.966	0.278152	2.93166e-10	5.80674e-06
CELF2	0.901	0.933	0.277695	4.82182e-10	9.55057e-06
LPCAT1	0.288	0.13	0.277644	2.96452e-12	5.87183e-08
TFDP2	0.507	0.444	0.277335	2.8353e-11	5.61587e-07
LFNG	0.29	0.123	0.276726	9.15903e-12	1.81413e-07
COA3	0.517	0.422	0.276361	9.06736e-12	1.79597e-07
SETX	0.568	0.509	0.276343	1.52174e-11	3.01411e-07
RIN3	0.267	0.115	0.27582	1.72511e-10	3.41692e-06
GFI1	0.231	0.073	0.275787	5.0148e-15	9.93281e-11
DLG1	0.552	0.472	0.275606	3.66581e-08	0.000726087
SEPHS2	0.443	0.342	0.275542	3.93315e-12	7.7904e-08
ECH1	0.748	0.732	0.275139	1.11732e-14	2.21307e-10
RIOK3	0.757	0.728	0.274572	7.55993e-12	1.4974e-07
ATRX	0.785	0.806	0.274214	1.06648e-10	2.11237e-06
CALHM2	0.262	0.084	0.273987	1.69273e-14	3.3528e-10
SETBP1	0.196	0.019	0.273892	2.71165e-23	5.37097e-19
TLE5	0.991	0.99	0.273616	1.87204e-08	0.000370794
OGDH	0.745	0.707	0.273538	2.8926e-09	5.72937e-05
JPT1	0.863	0.848	0.273101	1.31521e-09	2.60505e-05
ATP13A3	0.498	0.413	0.272622	5.64788e-09	0.000111867
RAB11FIP4	0.37	0.234	0.272377	1.35222e-08	0.000267834
N4BP1	0.8	0.75	0.272336	2.44007e-07	0.00483304
STX8	0.517	0.445	0.270949	8.95558e-09	0.000177383
JKAMP	0.392	0.261	0.270888	9.4581e-10	1.87337e-05
SSR3	0.677	0.649	0.270852	8.5427e-13	1.69205e-08
ATP6V0D1	0.613	0.533	0.270452	5.39582e-09	0.000106875
PMAIP1	0.691	0.752	0.270447	1.18144e-09	2.34008e-05
ACTB	0.998	1	0.269829	1.96075e-11	3.88366e-07
ANKRD28	0.446	0.376	0.269127	1.45317e-10	2.8783e-06
BLVRA	0.552	0.508	0.269056	1.9349e-08	0.000383246
TRG-AS1	0.401	0.331	0.268745	3.43614e-08	0.000680595
C4orf48	0.788	0.782	0.268628	6.94744e-11	1.37608e-06
MAP7D1	0.517	0.413	0.268511	3.71174e-08	0.000735183
TSEN15	0.512	0.413	0.268014	8.60028e-10	1.70346e-05
TSPAN14	0.712	0.686	0.267936	8.71797e-11	1.72677e-06
BCAP31	0.781	0.715	0.267792	1.93993e-08	0.000384241
TMEM160	0.703	0.639	0.267527	2.05419e-10	4.06873e-06
JAK1	0.958	0.948	0.267493	5.49455e-09	0.000108831
PALM2-AKAP2	0.335	0.201	0.267443	8.61706e-10	1.70678e-05
USP28	0.276	0.135	0.267404	1.32052e-10	2.61555e-06
ANKRD11	0.84	0.848	0.267018	4.38049e-10	8.67644e-06
IFI27L1	0.316	0.192	0.266911	3.19003e-12	6.31849e-08
GLRX	0.627	0.555	0.266372	3.43215e-08	0.000679805
PSMC1	0.604	0.514	0.266319	2.98751e-10	5.91736e-06
FCGR3A	0.123	0.003	0.266177	3.33982e-18	6.61517e-14
RANBP9	0.682	0.614	0.266116	1.41044e-07	0.00279367
ASXL2	0.347	0.191	0.265798	4.52568e-10	8.96401e-06
ICAM3	0.849	0.82	0.265772	3.48368e-08	0.000690012
AC034238.1	0.25	0.064	0.265292	4.88514e-16	9.67599e-12
CARD8	0.571	0.494	0.265255	2.84407e-07	0.00563326
BLOC1S1	0.87	0.877	0.265064	5.30579e-11	1.05092e-06
UBE2V1	0.875	0.853	0.264928	1.378e-09	2.7294e-05
TMEM256	0.823	0.769	0.264871	1.56516e-08	0.00031001
ARSA	0.33	0.192	0.264826	5.60085e-09	0.000110936
CDHR3	0.226	0.126	0.264745	3.85674e-08	0.000763904
NFIL3	0.309	0.167	0.264326	1.1136e-09	2.20571e-05
YWHAH	0.507	0.422	0.264101	1.71954e-08	0.000340589
DNAJC15	0.776	0.734	0.264009	7.48223e-09	0.000148201
HEXA	0.559	0.467	0.263776	5.1274e-08	0.00101558
CXorf38	0.403	0.273	0.263401	1.07537e-08	0.000212999
LRRFIP2	0.474	0.391	0.263165	1.68228e-09	3.33209e-05
TMEM35B	0.417	0.331	0.263038	3.4886e-11	6.90986e-07
IK	0.774	0.772	0.262895	1.37204e-09	2.7176e-05
VMP1	0.729	0.702	0.26217	2.42616e-08	0.000480549
IFI35	0.679	0.631	0.261714	5.03158e-09	9.96604e-05
ARF5	0.917	0.921	0.261631	1.36526e-09	2.70418e-05
GIMAP5	0.639	0.594	0.261594	7.05831e-09	0.000139804
GLG1	0.691	0.639	0.261557	4.89037e-08	0.000968636
SMC6	0.432	0.309	0.261036	6.31981e-09	0.000125177
GPS2	0.722	0.664	0.260791	1.24754e-07	0.00247101
DPM3	0.542	0.501	0.26043	1.51046e-09	2.99177e-05
PDK2	0.304	0.153	0.25953	3.8595e-11	7.6445e-07
YIPF3	0.592	0.538	0.259212	1.62339e-10	3.21544e-06
ILK	0.524	0.437	0.258793	8.7282e-11	1.72879e-06
PIK3CG	0.366	0.251	0.258741	2.85876e-09	5.66234e-05
MPG	0.752	0.69	0.258612	1.4138e-08	0.00028003
CLTC	0.637	0.533	0.258545	1.40448e-07	0.00278186
TMX1	0.476	0.43	0.258526	6.42986e-15	1.27356e-10
RNF169	0.354	0.238	0.258246	3.27875e-09	6.49423e-05
TBC1D14	0.422	0.339	0.258223	6.92772e-10	1.37217e-05
LRIG1	0.29	0.184	0.257792	2.13827e-10	4.23527e-06
CEP164	0.422	0.302	0.257709	2.28916e-08	0.000453414
ABAT	0.219	0.071	0.257497	3.13181e-13	6.20318e-09
DDOST	0.833	0.813	0.256983	9.64019e-12	1.90943e-07
TAP1	0.83	0.759	0.256938	3.40351e-07	0.00674133
LINC00891	0.193	0.069	0.256876	4.29386e-11	8.50485e-07
HDAC1	0.75	0.718	0.256645	2.75732e-10	5.46142e-06
B4GALT5	0.257	0.073	0.256095	1.49664e-15	2.96439e-11
AIP	0.745	0.727	0.255705	1.32957e-10	2.63347e-06
ATP8B2	0.295	0.142	0.25524	3.46816e-09	6.86938e-05
ST3GAL1	0.476	0.388	0.255133	1.84327e-07	0.00365097
RAB11FIP1	0.493	0.418	0.254975	1.64295e-06	0.032542
FAM107B	0.948	0.943	0.254944	1.26068e-07	0.00249703
RNPEPL1	0.656	0.587	0.254672	6.47536e-09	0.000128258
RALBP1	0.679	0.619	0.254602	5.94178e-09	0.000117689
ZBTB7A	0.535	0.411	0.25447	2.02421e-06	0.0400936
AC068279.2	0.238	0.083	0.254446	3.62472e-12	7.17948e-08
ZRSR2	0.476	0.373	0.254223	3.46507e-08	0.000686327
RALGDS	0.455	0.354	0.254101	4.60897e-07	0.00912899
BSG	0.759	0.747	0.253898	2.76046e-12	5.46765e-08
POLR3GL	0.675	0.627	0.253848	1.5171e-09	3.00492e-05
NLRC3	0.458	0.354	0.253298	8.22987e-08	0.00163009
ZDHHC3	0.417	0.332	0.25309	3.20496e-08	0.000634807
DENND1B	0.439	0.356	0.252904	6.9205e-08	0.00137074
ZFPM1	0.387	0.265	0.252768	1.25752e-06	0.0249076
ZFYVE28	0.29	0.162	0.252418	3.04874e-08	0.000603864
TMBIM1	0.417	0.314	0.252359	5.51522e-09	0.00010924
MZT2A	0.906	0.879	0.252217	5.25025e-08	0.00103992
ROCK1	0.809	0.781	0.252108	1.24412e-07	0.00246422
ZC3H18	0.432	0.347	0.251947	1.34263e-09	2.65935e-05
WDFY1	0.601	0.538	0.251717	9.03311e-08	0.00178919
PRDM8	0.208	0.037	0.251691	3.17596e-18	6.29063e-14
ARHGAP45	0.764	0.707	0.251598	1.62291e-07	0.00321449
RAPGEF1	0.722	0.725	0.251186	2.6248e-08	0.000519895
MAPK14	0.387	0.263	0.251107	9.13987e-08	0.00181033
ORMDL3	0.403	0.317	0.250419	7.69261e-09	0.000152368
WARS	0.458	0.411	0.250057	1.59068e-07	0.00315066
PSMA5	0.828	0.808	0.249856	8.19835e-08	0.00162385
FBXW5	0.557	0.452	0.249812	7.23989e-08	0.00143401
MAP2K3	0.564	0.438	0.248982	2.03176e-08	0.000402431
S100PBP	0.349	0.228	0.24897	3.27773e-08	0.00064922
ADD1	0.639	0.592	0.248519	9.87571e-09	0.000195608
TRIM69	0.382	0.285	0.248303	1.55925e-10	3.0884e-06
ACTR10	0.517	0.438	0.247959	1.64312e-08	0.000325453
KIAA0825	0.17	0.052	0.247228	4.21869e-10	8.35596e-06
UBAC2	0.613	0.54	0.246759	1.33829e-06	0.0265076
CYTH1	0.896	0.892	0.246096	8.56387e-07	0.0169625
ATG16L1	0.363	0.273	0.245462	9.64362e-09	0.000191011
PRKAR1A	0.675	0.649	0.245369	1.88472e-08	0.000373306
DENND4C	0.545	0.469	0.245325	1.84281e-06	0.0365005
SLC2A8	0.186	0.017	0.245317	2.51302e-21	4.97754e-17
DDX5	0.974	0.993	-0.245553	1.68543e-08	0.000333834
ST6GALNAC1	0.005	0.167	-0.245609	5.44001e-22	1.0775e-17
EIF5	0.764	0.897	-0.246009	5.72328e-09	0.000113361
ARL4A	0.269	0.457	-0.24656	3.47217e-09	6.87733e-05
FASN	0.064	0.253	-0.24668	1.32685e-15	2.62808e-11
LINC01578	0.969	0.995	-0.247108	4.29046e-09	8.49812e-05
ECE1	0.321	0.556	-0.247131	4.78331e-13	9.4743e-09
ST8SIA1	0.087	0.288	-0.247623	1.09798e-15	2.17476e-11
ZFY	0.045	0.233	-0.248278	5.22283e-18	1.03449e-13
LY9	0.108	0.293	-0.248752	2.57579e-12	5.10188e-08
SIK1B	0.08	0.275	-0.248903	5.50437e-15	1.09025e-10
SNRPD2	0.965	0.992	-0.249044	5.73246e-11	1.13543e-06
PRKCB	0.722	0.872	-0.249068	5.07507e-09	0.000100522
PFKFB3	0.307	0.472	-0.249659	5.19277e-07	0.0102853
LYRM4	0.186	0.391	-0.251719	3.2183e-12	6.37448e-08
DHX9	0.467	0.639	-0.252214	1.23211e-07	0.00244044
GPR171	0.267	0.423	-0.252595	1.17588e-06	0.0232907
AMBRA1	0.38	0.545	-0.25283	6.91823e-07	0.0137029
KLF4	0.047	0.211	-0.25467	5.23505e-14	1.03691e-09
UGCG	0.354	0.543	-0.255257	1.3892e-08	0.000275159
SLCO3A1	0.325	0.519	-0.255614	3.87613e-09	7.67744e-05
FOS	0.913	0.973	-0.25622	1.1869e-07	0.0023509
PASK	0.146	0.27	-0.256259	9.9794e-07	0.0197662
TPR	0.781	0.895	-0.257395	2.83622e-08	0.00056177
RNF168	0.328	0.482	-0.257681	1.25375e-06	0.024833
JMY	0.302	0.514	-0.258701	7.84853e-11	1.55456e-06
SRSF2	0.818	0.912	-0.258858	6.76793e-08	0.00134052
KLHL42	0.101	0.275	-0.258997	9.58505e-12	1.89851e-07
KLHL5	0.248	0.435	-0.259617	3.63276e-09	7.19541e-05
FUS	0.778	0.894	-0.25989	2.02914e-08	0.000401912
SNU13	0.887	0.943	-0.26082	2.22598e-08	0.000440899
KLF2	0.946	0.995	-0.260872	3.78542e-09	7.49778e-05
LDHA	0.889	0.944	-0.26128	4.33696e-08	0.000859022
TTC3	0.3	0.523	-0.261296	6.00212e-12	1.18884e-07
RALA	0.62	0.747	-0.261297	1.34763e-06	0.0266925
SMARCC1	0.587	0.759	-0.261854	1.55479e-08	0.000307957
PEBP1	0.708	0.882	-0.263668	3.33284e-12	6.60135e-08
RASGEF1B	0.165	0.334	-0.26385	4.08464e-09	8.09045e-05
STAG3	0.052	0.26	-0.264511	3.87539e-19	7.67599e-15
KLHL6	0.134	0.327	-0.265693	3.41595e-12	6.76598e-08
RPS15A	1	1	-0.266069	3.22745e-24	6.39261e-20
ANKRD55	0.014	0.219	-0.266692	1.90095e-25	3.76521e-21
GSTM1	0.047	0.288	-0.267499	1.87361e-26	3.71107e-22
STX17-AS1	0.125	0.315	-0.267541	3.31801e-12	6.57198e-08
BTG1	0.995	1	-0.268006	1.86459e-08	0.000369319
ETV6	0.583	0.745	-0.268072	4.71955e-08	0.000934802
SEPTIN6	0.92	0.965	-0.270387	1.62868e-09	3.22593e-05
PGK1	0.884	0.96	-0.270498	1.8786e-09	3.72094e-05
DGKA	0.361	0.629	-0.270774	8.8575e-17	1.7544e-12
WDR74	0.269	0.494	-0.270915	2.48509e-12	4.92221e-08
FGFR1	0.059	0.258	-0.271222	9.34617e-19	1.8512e-14
TP53INP1	0.351	0.555	-0.271367	8.99793e-10	1.78222e-05
PPP1CC	0.873	0.933	-0.271676	1.60697e-08	0.000318293
TFRC	0.219	0.393	-0.27301	2.49145e-09	4.93482e-05
CASS4	0.054	0.285	-0.274227	1.98143e-22	3.92461e-18
MLLT3	0.267	0.476	-0.27424	6.81016e-11	1.34889e-06
PGRMC2	0.236	0.43	-0.274989	4.00159e-10	7.92595e-06
PLEKHA7	0.243	0.474	-0.275215	2.83254e-13	5.61042e-09
GRAMD1A	0.321	0.567	-0.275957	5.3479e-14	1.05926e-09
TMIGD2	0.009	0.202	-0.27602	1.89615e-25	3.75571e-21
PLSCR3	0.7	0.863	-0.276553	2.92008e-10	5.78381e-06
ISCA1	0.507	0.703	-0.278859	8.67545e-10	1.71835e-05
VAV3	0.219	0.406	-0.279374	1.02094e-09	2.02217e-05
GADD45G	0.045	0.202	-0.279496	1.55066e-13	3.0714e-09
ZC3H7A	0.436	0.641	-0.28155	5.46511e-10	1.08247e-05
MPP7	0.118	0.336	-0.281612	1.91223e-15	3.78756e-11
SRM	0.446	0.676	-0.282072	1.85038e-12	3.66505e-08
KDSR	0.139	0.356	-0.283871	2.02901e-14	4.01885e-10
EIF3B	0.436	0.644	-0.2852	8.86116e-11	1.75513e-06
ATF3	0.099	0.282	-0.285378	1.36391e-12	2.70149e-08
GNB5	0.203	0.415	-0.286078	3.98511e-12	7.89331e-08
CYSLTR1	0.017	0.189	-0.286682	4.26361e-20	8.44494e-16
USP14	0.342	0.545	-0.287704	2.8389e-10	5.62302e-06
SF1	0.83	0.921	-0.28796	3.79859e-09	7.52386e-05
LSM7	0.849	0.922	-0.288692	4.64448e-10	9.19931e-06
FAU	1	1	-0.28975	2.86203e-25	5.66882e-21
ABLIM1	0.67	0.841	-0.289807	6.95652e-10	1.37788e-05
RCAN3	0.347	0.54	-0.289847	5.06491e-09	0.000100321
BEX4	0.064	0.288	-0.290069	1.96535e-20	3.89276e-16
RNF138	0.401	0.626	-0.29116	7.09859e-12	1.40602e-07
HNRNPAB	0.347	0.536	-0.292029	7.1667e-09	0.000141951
HLA-DQB1	0.137	0.352	-0.292682	1.15115e-14	2.28008e-10
LGALS9	0.667	0.84	-0.293664	8.58648e-11	1.70072e-06
AHR	0.252	0.428	-0.293847	5.17984e-09	0.000102597
HNRNPDL	0.901	0.951	-0.293931	1.40942e-09	2.79163e-05
UBASH3B	0.363	0.563	-0.294201	1.2318e-09	2.43983e-05
MAPK1	0.337	0.56	-0.294906	9.85196e-12	1.95138e-07
SKP1	0.943	0.971	-0.29492	1.48307e-13	2.93752e-09
OSBPL8	0.804	0.892	-0.295524	2.27092e-07	0.004498
ANKRD12	0.868	0.96	-0.295728	2.6085e-09	5.16666e-05
ETHE1	0.519	0.723	-0.296124	6.17124e-11	1.22234e-06
DENND5A	0.005	0.243	-0.296428	3.92395e-34	7.77216e-30
SNHG16	0.406	0.627	-0.296851	1.42869e-11	2.82981e-07
NDFIP1	0.809	0.919	-0.298036	1.20274e-09	2.38226e-05
SUSD3	0.347	0.567	-0.298396	2.3228e-11	4.60077e-07
CCDC57	0.441	0.678	-0.298396	2.8253e-13	5.59607e-09
NUTF2	0.639	0.799	-0.298426	1.03562e-09	2.05126e-05
SERBP1	0.854	0.934	-0.29861	2.13381e-09	4.22644e-05
ULBP2	0.019	0.191	-0.299046	9.90172e-20	1.96123e-15
SNHG1	0.333	0.555	-0.299605	1.45084e-11	2.87369e-07
HOOK2	0.408	0.575	-0.302229	2.04659e-07	0.00405368
COX7C	0.995	0.998	-0.302562	6.79253e-24	1.3454e-19
CEMIP2	0.811	0.916	-0.30277	6.81597e-08	0.00135004
ITPKB	0.314	0.538	-0.303538	6.00332e-12	1.18908e-07
SNX9	0.835	0.926	-0.303543	6.08332e-07	0.0120492
TCERG1	0.41	0.616	-0.303562	8.86575e-11	1.75604e-06
METTL26	0.538	0.757	-0.303798	7.1327e-13	1.41277e-08
SREBF2	0.373	0.616	-0.304513	1.50292e-13	2.97684e-09
IL4R	0.177	0.401	-0.304909	5.54019e-14	1.09735e-09
EIF4A1	0.95	0.973	-0.306109	3.05714e-11	6.05528e-07
SH3TC1	0.033	0.233	-0.307411	1.36532e-20	2.70429e-16
FILIP1L	0.038	0.223	-0.30763	1.86876e-18	3.70145e-14
APEX1	0.382	0.58	-0.308684	4.25282e-11	8.42357e-07
HMGB1	0.993	0.995	-0.309152	2.79289e-09	5.53187e-05
EIF3F	0.946	0.978	-0.309538	3.12745e-14	6.19454e-10
LIMS2	0.012	0.245	-0.311359	1.61011e-30	3.18914e-26
EIF2A	0.505	0.702	-0.311615	4.22508e-11	8.36861e-07
ATIC	0.318	0.545	-0.311916	1.39511e-12	2.7633e-08
XPO6	0.335	0.556	-0.312762	3.82001e-12	7.5663e-08
NDUFA12	0.84	0.931	-0.313457	1.90996e-10	3.78305e-06
LRRC8D	0.153	0.433	-0.315204	1.39202e-21	2.75718e-17
HINT1	0.991	1	-0.3159	2.31807e-20	4.5914e-16
SNHG32	0.2	0.445	-0.316295	1.50167e-15	2.97435e-11
NME1	0.403	0.582	-0.320063	2.27765e-09	4.51134e-05
HNRNPA0	0.656	0.833	-0.320626	1.42356e-11	2.81965e-07
HAUS3	0.488	0.678	-0.320689	2.59431e-10	5.13855e-06
TRIM44	0.233	0.479	-0.320864	4.77551e-15	9.45885e-11
HSPE1	0.769	0.875	-0.320936	1.37128e-09	2.7161e-05
EIF3L	0.762	0.89	-0.321092	7.46841e-13	1.47927e-08
HSPB1	0.469	0.69	-0.322553	6.72586e-12	1.33219e-07
NHP2	0.564	0.749	-0.322718	5.82218e-11	1.1532e-06
RPL22L1	0.729	0.872	-0.324316	5.34328e-10	1.05834e-05
YBX1	0.95	0.98	-0.332008	4.3854e-11	8.68616e-07
TAF4B	0.021	0.265	-0.332053	1.15717e-30	2.29201e-26
YIPF5	0.443	0.583	-0.332393	1.69778e-07	0.00336279
PDE4D	0.575	0.798	-0.333075	1.02284e-13	2.02594e-09
KAT6B	0.446	0.661	-0.334298	1.10198e-11	2.18268e-07
MYC	0.106	0.341	-0.335821	4.44492e-18	8.80405e-14
UBA52	0.995	1	-0.335831	2.87574e-27	5.69599e-23
RNF125	0.809	0.917	-0.335937	9.67292e-10	1.91592e-05
PIM3	0.34	0.568	-0.336141	3.40785e-12	6.74993e-08
BCAT1	0.045	0.297	-0.336492	1.94172e-27	3.84596e-23
NACA	0.998	1	-0.336613	1.34282e-31	2.65972e-27
SCML4	0.333	0.59	-0.337966	3.28883e-15	6.51418e-11
GPR132	0.212	0.487	-0.338123	8.10347e-19	1.60505e-14
TIMM13	0.429	0.695	-0.339166	1.71278e-16	3.39251e-12
PPP1R15A	0.795	0.899	-0.33959	4.5953e-10	9.10191e-06
RNMT	0.592	0.809	-0.340143	1.38621e-14	2.74566e-10
RPL41	1	1	-0.341097	1.58126e-32	3.13199e-28
CIRBP	0.823	0.938	-0.342374	8.53033e-13	1.6896e-08
GADD45A	0.368	0.555	-0.342467	4.98459e-09	9.87297e-05
LMO7	0.035	0.277	-0.342595	2.34485e-26	4.64445e-22
PPP1CB	0.578	0.771	-0.342729	1.38714e-11	2.74752e-07
TKT	0.625	0.809	-0.344255	4.0888e-12	8.09868e-08
IL6ST	0.521	0.727	-0.345262	1.83822e-11	3.64097e-07
PIM1	0.491	0.7	-0.346553	1.24329e-11	2.46258e-07
CHKA	0.035	0.261	-0.347885	1.19256e-25	2.3621e-21
NOP53	0.788	0.914	-0.347981	1.10472e-12	2.18812e-08
SNHG15	0.238	0.503	-0.349337	4.99053e-17	9.88475e-13
NFATC1	0.389	0.58	-0.349859	1.10788e-10	2.19438e-06
FOXP1	0.884	0.976	-0.350149	4.2477e-13	8.41342e-09
LGALS3BP	0.3	0.585	-0.350381	1.03729e-18	2.05456e-14
CNIH1	0.45	0.734	-0.350459	5.49397e-19	1.08819e-14
RBFOX2	0.922	0.99	-0.351402	3.34442e-20	6.6243e-16
RBL1	0.307	0.548	-0.352125	8.81895e-14	1.74677e-09
BCL6	0.12	0.381	-0.353762	1.50504e-20	2.98102e-16
C1orf162	0.012	0.253	-0.35421	5.90275e-33	1.16916e-28
PGLS	0.679	0.86	-0.354792	1.10821e-14	2.19503e-10
RETREG1	0.05	0.309	-0.356552	1.16503e-26	2.30758e-22
DEAF1	0.191	0.43	-0.356766	1.49767e-15	2.96643e-11
HAPLN3	0.153	0.403	-0.358336	8.02824e-18	1.59015e-13
FAAH2	0.146	0.347	-0.358936	1.67291e-12	3.31353e-08
IMPDH2	0.276	0.496	-0.36124	2.79009e-13	5.52634e-09
PLK3	0.316	0.599	-0.363179	3.22276e-18	6.38332e-14
PAICS	0.146	0.415	-0.363313	1.46056e-20	2.89294e-16
EIF1	1	0.998	-0.365182	1.92385e-24	3.81056e-20
IL21R	0.354	0.594	-0.365397	1.54656e-13	3.06327e-09
PGAP1	0.108	0.344	-0.366096	3.05889e-18	6.05874e-14
MED13L	0.498	0.745	-0.36715	9.57078e-16	1.89568e-11
MRPL14	0.45	0.681	-0.368263	9.84345e-15	1.94969e-10
RSL1D1	0.656	0.841	-0.368297	2.41234e-14	4.77811e-10
IFITM2	0.988	0.997	-0.368554	1.03749e-16	2.05495e-12
GRASP	0.017	0.248	-0.370164	5.80494e-29	1.14978e-24
SMDT1	0.851	0.96	-0.372838	1.15764e-18	2.29294e-14
SET	0.877	0.956	-0.372859	1.37499e-14	2.72345e-10
BTF3	0.993	1	-0.372982	9.08826e-35	1.80011e-30
SFPQ	0.875	0.966	-0.373404	2.39896e-14	4.75162e-10
HSPH1	0.481	0.691	-0.373667	3.05563e-12	6.05229e-08
AC138123.1	0.823	0.933	-0.375255	1.11121e-15	2.20098e-11
REL	0.542	0.744	-0.376122	8.43056e-12	1.66984e-07
RPL35	0.995	1	-0.377123	3.08033e-36	6.10121e-32
VDAC1	0.715	0.875	-0.381804	4.67396e-15	9.2577e-11
NCOA7	0.396	0.627	-0.38245	1.5851e-13	3.1396e-09
SSH2	0.788	0.912	-0.38258	1.76777e-12	3.50143e-08
CXCR4	0.698	0.89	-0.382989	8.16631e-15	1.6175e-10
PELI1	0.653	0.847	-0.382992	1.82935e-13	3.6234e-09
HIPK2	0.057	0.307	-0.385465	9.62252e-25	1.90593e-20
UST	0.026	0.282	-0.385703	2.12344e-30	4.20591e-26
CDCA7	0.113	0.359	-0.386413	1.61312e-19	3.1951e-15
RPS19	1	1	-0.386758	7.59864e-42	1.50506e-37
JUND	0.974	0.997	-0.389335	4.84149e-14	9.58955e-10
PSIP1	0.554	0.754	-0.391957	9.53289e-15	1.88818e-10
TOMM20	0.795	0.912	-0.392155	3.90348e-18	7.73162e-14
SFXN1	0.557	0.777	-0.392489	2.22818e-15	4.41335e-11
DUT	0.592	0.781	-0.393634	4.91746e-11	9.74002e-07
CEBPZ	0.448	0.642	-0.393848	2.20356e-11	4.36459e-07
FBL	0.517	0.766	-0.394371	2.64768e-17	5.24427e-13
PTGER4	0.587	0.806	-0.394911	1.92708e-14	3.81697e-10
LYPD3	0.009	0.261	-0.395354	8.42819e-35	1.66937e-30
TM9SF3	0.526	0.74	-0.396195	8.41082e-15	1.66593e-10
PNRC1	0.948	0.992	-0.396352	1.7728e-17	3.51139e-13
BCL2A1	0.144	0.405	-0.397721	8.34677e-20	1.65324e-15
TOX	0.179	0.415	-0.398043	2.96927e-15	5.88122e-11
SNHG3	0.318	0.562	-0.400414	2.05726e-15	4.07482e-11
SCML1	0.002	0.245	-0.400681	3.77536e-36	7.47785e-32
USP9Y	0.083	0.401	-0.401487	3.43643e-33	6.80654e-29
CHD7	0.033	0.322	-0.402654	1.334e-34	2.64224e-30
MTHFD2	0.502	0.703	-0.402897	1.59879e-12	3.16672e-08
AL135905.2	0.408	0.627	-0.40296	2.41293e-13	4.77928e-09
AREG	0.047	0.25	-0.404406	4.96723e-19	9.83859e-15
PRKY	0.097	0.417	-0.405682	3.69275e-32	7.31423e-28
ATP8A1	0.38	0.632	-0.405702	4.90116e-15	9.70774e-11
BAZ1A	0.689	0.863	-0.407386	4.53322e-14	8.97896e-10
RAN	0.854	0.949	-0.408111	6.99714e-14	1.38592e-09
PKM	0.762	0.867	-0.408322	2.10891e-11	4.17712e-07
SOD2	0.557	0.779	-0.411131	1.73909e-15	3.44461e-11
EIF5A	0.854	0.941	-0.412808	1.12817e-17	2.23457e-13
FYB1	0.958	0.995	-0.41281	3.18092e-20	6.30044e-16
CORO1B	0.703	0.841	-0.416701	2.42479e-10	4.80278e-06
MTHFD1L	0.17	0.442	-0.417544	1.93643e-20	3.83549e-16
CLNS1A	0.524	0.745	-0.417871	8.79622e-18	1.74227e-13
EPHA4	0.165	0.427	-0.418484	2.99141e-19	5.92508e-15
FAM102A	0.255	0.568	-0.419546	6.87707e-23	1.36214e-18
PHLDB3	0.085	0.378	-0.420542	1.26512e-27	2.50583e-23
LEPROTL1	0.962	0.995	-0.420834	3.04958e-22	6.0403e-18
TUBA1A	0.731	0.887	-0.421246	1.83566e-13	3.6359e-09
PPP1R14B	0.33	0.617	-0.424034	2.7976e-19	5.5412e-15
MAP4K4	0.396	0.671	-0.424636	8.81735e-19	1.74645e-14
NR4A3	0.182	0.43	-0.42512	9.77475e-17	1.93608e-12
CDKN2D	0.406	0.668	-0.425862	3.2192e-17	6.37626e-13
RBMS1	0.387	0.681	-0.426092	5.88263e-20	1.16517e-15
FAM117B	0.144	0.442	-0.426617	1.74326e-24	3.45287e-20
EEF1G	0.953	0.995	-0.427535	8.83838e-32	1.75062e-27
RAB3GAP1	0.389	0.668	-0.427962	7.76863e-19	1.53873e-14
TXK	0.2	0.492	-0.432494	2.85659e-21	5.65805e-17
EIF1AY	0.099	0.432	-0.432549	4.6305e-34	9.17162e-30
JMJD1C	0.778	0.882	-0.433759	1.09638e-12	2.1716e-08
UTY	0.094	0.42	-0.434071	5.68162e-33	1.12536e-28
SKIL	0.354	0.595	-0.435422	3.26312e-15	6.46326e-11
ESYT2	0.601	0.813	-0.438394	1.85814e-15	3.68042e-11
PIK3R1	0.691	0.855	-0.439291	2.86599e-13	5.67666e-09
NAP1L1	0.901	0.987	-0.439984	5.75583e-27	1.14006e-22
IFITM1	1	1	-0.442369	3.0263e-28	5.99419e-24
SOD1	0.868	0.958	-0.442962	6.37904e-20	1.2635e-15
ESD	0.373	0.668	-0.444002	2.14869e-22	4.25591e-18
BEX2	0.054	0.356	-0.444395	1.29926e-33	2.57344e-29
TLK1	0.689	0.867	-0.444933	4.32612e-18	8.56874e-14
SLC25A5	0.91	0.97	-0.446888	5.18965e-17	1.02791e-12
RPL8	1	1	-0.450711	5.22568e-53	1.03505e-48
ACTN1	0.021	0.292	-0.451628	3.74892e-35	7.42548e-31
SYPL1	0.118	0.486	-0.453543	5.71416e-37	1.1318e-32
CD5	0.618	0.858	-0.455339	4.6766e-22	9.26294e-18
CAMK1D	0.377	0.658	-0.457237	1.82736e-19	3.61945e-15
LY96	0.083	0.381	-0.457322	2.56396e-29	5.07843e-25
RPL18	1	1	-0.457498	2.62606e-58	5.20144e-54
RPL6	1	1	-0.459665	5.07392e-47	1.00499e-42
ARRDC2	0.344	0.642	-0.463467	1.70312e-21	3.37337e-17
SGK1	0.092	0.312	-0.464964	6.60218e-18	1.30769e-13
EEF2	0.981	1	-0.466377	2.24438e-36	4.44545e-32
HSPD1	0.71	0.86	-0.466544	5.15464e-15	1.02098e-10
ID1	0.113	0.28	-0.467724	4.09608e-11	8.11311e-07
CD7	0.502	0.702	-0.468263	7.8827e-11	1.56133e-06
DENND4A	0.566	0.799	-0.468544	2.37771e-17	4.70953e-13
MBP	0.667	0.889	-0.471612	3.20207e-22	6.34235e-18
RPS28	1	1	-0.472102	7.53933e-61	1.49332e-56
VIM	0.967	0.987	-0.477276	2.26417e-14	4.48464e-10
RAPGEF6	0.59	0.776	-0.477455	1.36738e-14	2.70837e-10
NSA2	0.757	0.922	-0.47885	9.76993e-24	1.93513e-19
SETD2	0.679	0.858	-0.48047	1.94026e-16	3.84308e-12
TRIB2	0.363	0.627	-0.481203	2.87833e-18	5.7011e-14
RPS9	0.995	0.998	-0.481633	4.42377e-56	8.76217e-52
TPT1	1	1	-0.484935	4.25664e-43	8.43113e-39
APRT	0.83	0.946	-0.484949	1.56432e-25	3.09846e-21
NPM1	0.986	0.993	-0.485121	7.14181e-33	1.41458e-28
ANP32B	0.884	0.975	-0.486351	4.12528e-26	8.17094e-22
RPL17	0.995	1	-0.486821	5.15149e-45	1.02036e-40
TNIK	0.566	0.826	-0.487632	5.7678e-21	1.14243e-16
IRF2BP2	0.318	0.651	-0.488472	1.04729e-25	2.07437e-21
USP3-AS1	0.307	0.546	-0.489906	3.64933e-17	7.22823e-13
COTL1	0.934	0.992	-0.492266	5.9928e-24	1.18699e-19
CMTM8	0.208	0.464	-0.495533	1.3951e-19	2.76327e-15
PIK3CA	0.297	0.599	-0.497219	4.29553e-22	8.50815e-18
THADA	0.325	0.523	-0.500314	2.67757e-12	5.30346e-08
RPL14	1	1	-0.501698	5.62588e-64	1.11432e-59
TMEM156	0.285	0.585	-0.502516	1.83837e-22	3.64126e-18
RPS3	0.998	1	-0.504954	3.96716e-72	7.85775e-68
S1PR1	0.519	0.766	-0.50648	2.98618e-19	5.91473e-15
STAT1	0.757	0.904	-0.507254	9.14508e-18	1.81137e-13
FTH1	1	1	-0.507712	1.62028e-20	3.20928e-16
PIK3IP1	0.446	0.793	-0.507715	1.59618e-30	3.16155e-26
PHACTR2	0.571	0.835	-0.507785	2.09441e-22	4.1484e-18
RPL24	0.998	1	-0.510095	1.19706e-57	2.37102e-53
RACK1	1	0.998	-0.510515	2.60852e-56	5.1667e-52
MALT1	0.443	0.718	-0.512553	8.73202e-21	1.72955e-16
RPS7	1	1	-0.512785	1.46947e-69	2.91058e-65
MT1X	0.677	0.825	-0.514479	7.02779e-17	1.392e-12
SNHG5	0.613	0.821	-0.520397	3.01578e-21	5.97336e-17
NFKB1	0.691	0.874	-0.521097	1.1442e-16	2.26632e-12
RPL28	1	1	-0.523098	5.50057e-73	1.0895e-68
DEK	0.762	0.907	-0.526228	1.19562e-18	2.36816e-14
SNHG8	0.578	0.853	-0.527987	2.85193e-27	5.64881e-23
AKT3	0.167	0.518	-0.529103	6.84885e-31	1.35655e-26
RPL29	1	1	-0.533545	3.94569e-68	7.81522e-64
RPL26	1	1	-0.533741	2.40425e-70	4.7621e-66
CERS6	0.186	0.54	-0.539147	4.68683e-31	9.2832e-27
AP000787.1	0.057	0.39	-0.539158	7.64205e-38	1.51366e-33
RPL36	1	1	-0.540401	1.58834e-77	3.14603e-73
RNF19A	0.936	0.966	-0.541374	1.3799e-16	2.73317e-12
PDCD4	0.71	0.877	-0.542455	1.70962e-19	3.38625e-15
RPS5	0.993	1	-0.542754	2.64238e-57	5.23375e-53
RPL38	0.972	0.998	-0.544144	8.34965e-50	1.65382e-45
RPS11	0.983	0.997	-0.54736	1.06149e-42	2.1025e-38
STAT3	0.767	0.901	-0.550599	5.90491e-23	1.16959e-18
HMGN1	0.764	0.927	-0.552857	2.5576e-26	5.06584e-22
NR3C1	0.651	0.813	-0.558098	1.08918e-18	2.15734e-14
RPL7A	0.998	1	-0.558161	8.84978e-68	1.75288e-63
HIF1A	0.59	0.835	-0.558693	1.79825e-23	3.56179e-19
EIF3E	0.83	0.96	-0.558929	2.78919e-31	5.52454e-27
TESPA1	0.337	0.681	-0.559402	5.75012e-30	1.13893e-25
HNRNPA1	0.983	0.995	-0.562717	1.42012e-41	2.81284e-37
IKZF1	0.696	0.899	-0.56859	7.44925e-25	1.47547e-20
SMAP2	0.67	0.895	-0.568872	6.47729e-26	1.28296e-21
TTC39C	0.267	0.666	-0.572597	2.97127e-36	5.88519e-32
RPLP2	0.998	1	-0.572634	1.74698e-80	3.46025e-76
RPL39	1	1	-0.573386	4.90035e-70	9.70612e-66
RGCC	0.601	0.815	-0.577456	2.47439e-17	4.90103e-13
C1QBP	0.642	0.868	-0.577862	3.2644e-27	6.4658e-23
MAL	0.035	0.298	-0.580232	4.0962e-30	8.11334e-26
RPLP0	0.998	1	-0.585301	1.03986e-53	2.05965e-49
TNFSF8	0.292	0.653	-0.586154	4.72571e-30	9.36022e-26
FAM177A1	0.712	0.884	-0.586264	1.22587e-21	2.42808e-17
TOX2	0.288	0.597	-0.586325	4.97196e-24	9.84795e-20
AP3M2	0.387	0.712	-0.588412	1.47689e-27	2.92527e-23
RPS24	0.998	1	-0.589352	5.29256e-86	1.0483e-81
HERC1	0.684	0.87	-0.59056	1.726e-20	3.41869e-16
RPS27	1	1	-0.595118	9.08339e-68	1.79915e-63
RPS21	1	1	-0.595813	5.82691e-93	1.15414e-88
RPL35A	1	1	-0.596281	3.0041e-83	5.95023e-79
GAS5	0.658	0.897	-0.602897	1.36343e-30	2.70054e-26
CMSS1	0.134	0.44	-0.60473	6.36089e-28	1.2599e-23
AFF3	0.021	0.427	-0.608265	3.30634e-58	6.54887e-54
ZFAS1	0.816	0.965	-0.609364	8.01507e-34	1.58754e-29
RPL15	0.995	1	-0.610167	3.00649e-74	5.95495e-70
HMGA1	0.476	0.774	-0.610806	1.13001e-28	2.23822e-24
FHIT	0.142	0.465	-0.61298	8.2391e-29	1.63192e-24
RPS13	1	1	-0.616867	5.64947e-81	1.11899e-76
SLC25A6	0.941	0.992	-0.6179	2.44459e-43	4.84199e-39
CD55	0.637	0.879	-0.618339	1.56574e-29	3.10126e-25
SNHG6	0.851	0.966	-0.62131	2.51451e-40	4.98048e-36
TP53BP2	0.229	0.587	-0.621656	7.02011e-34	1.39047e-29
MT1E	0.604	0.848	-0.623796	1.17614e-21	2.32959e-17
ABCC1	0.5	0.766	-0.631567	7.33848e-27	1.45353e-22
BTBD11	0.342	0.681	-0.631944	2.95392e-29	5.85083e-25
DDX21	0.538	0.821	-0.637081	5.25334e-30	1.04053e-25
RPLP1	1	1	-0.63731	8.38993e-119	1.66179e-114
RPL19	1	1	-0.637607	1.89956e-101	3.76245e-97
SOCS1	0.158	0.524	-0.638809	1.47168e-35	2.91495e-31
RPL27	0.995	0.995	-0.638963	2.45472e-72	4.86207e-68
DDX3Y	0.09	0.499	-0.639458	1.81691e-46	3.59876e-42
LDHB	0.95	0.99	-0.640559	2.01279e-45	3.98673e-41
RPL23A	0.998	1	-0.640802	1.07166e-72	2.12263e-68
APOO	0.875	0.968	-0.640891	1.25137e-40	2.47859e-36
RPL11	1	1	-0.644654	7.24314e-91	1.43465e-86
RPL4	0.988	0.993	-0.645537	6.66973e-55	1.32107e-50
RPL3	0.995	0.998	-0.650224	1.38892e-62	2.75103e-58
RPL13	1	1	-0.653085	2.65668e-103	5.26209e-99
HSP90AB1	0.875	0.973	-0.656345	1.58181e-27	3.13309e-23
RPS20	0.856	0.958	-0.660598	3.53411e-33	7.00002e-29
RPL5	0.993	0.998	-0.663011	5.87655e-67	1.16397e-62
PGM2L1	0.215	0.518	-0.663778	4.23946e-25	8.3971e-21
RPS14	1	1	-0.664759	8.75426e-110	1.73396e-105
PDE3B	0.531	0.841	-0.666127	1.24908e-29	2.47405e-25
MAML2	0.316	0.681	-0.668085	9.37693e-32	1.85729e-27
RPL31	0.981	1	-0.670791	6.84934e-75	1.35665e-70
RPL34	1	1	-0.674457	2.91303e-91	5.76983e-87
ASAP1	0.182	0.578	-0.675965	6.09467e-41	1.20717e-36
SNHG29	0.866	0.961	-0.676152	1.33529e-41	2.64482e-37
RPL10	1	1	-0.676834	7.64759e-76	1.51476e-71
NOSIP	0.882	0.944	-0.677	7.47449e-26	1.48047e-21
RPL37A	0.993	1	-0.679424	1.52265e-80	3.01591e-76
RPS17	0.887	0.993	-0.679699	7.63321e-56	1.51191e-51
RPS16	0.995	0.998	-0.682236	3.07107e-86	6.08287e-82
TMEM243	0.526	0.83	-0.685011	2.05372e-36	4.0678e-32
ZEB1	0.531	0.806	-0.686294	5.60794e-25	1.11076e-20
PCBP3	0.09	0.464	-0.688247	5.35398e-40	1.06046e-35
RPS27A	1	1	-0.694822	2.64247e-115	5.23393e-111
CAPG	0.057	0.45	-0.698626	2.72794e-49	5.40324e-45
MIF	0.941	0.99	-0.699146	4.12981e-42	8.17992e-38
ZFP36L2	0.922	0.988	-0.700071	4.03212e-30	7.98642e-26
RPS3A	1	1	-0.703916	2.77616e-91	5.49875e-87
GSPT1	0.79	0.916	-0.709244	1.08309e-30	2.14527e-26
RPS23	0.998	1	-0.709779	1.80045e-107	3.56615e-103
RPL21	0.979	0.993	-0.714272	5.64687e-72	1.11848e-67
RPL30	1	1	-0.724278	7.0534e-104	1.39707e-99
ALOX5AP	0.17	0.57	-0.727791	3.77158e-39	7.47036e-35
RPL7	0.972	0.998	-0.727861	7.35174e-75	1.45616e-70
AC004585.1	0.111	0.585	-0.730171	1.69892e-57	3.36506e-53
RPL32	1	1	-0.730983	6.04951e-107	1.19823e-102
PTMA	0.998	1	-0.733677	1.57057e-59	3.11083e-55
EEF1A1	1	1	-0.735621	1.22546e-113	2.42726e-109
RPL22	0.991	1	-0.736049	8.29091e-92	1.64218e-87
JUNB	0.936	0.971	-0.74187	1.22315e-21	2.4227e-17
RPL37	1	1	-0.74375	2.78944e-123	5.52504e-119
RPS29	1	1	-0.745427	5.61669e-104	1.1125e-99
ZNF331	0.46	0.788	-0.754389	1.31037e-30	2.59545e-26
RPL23	0.941	0.99	-0.770496	1.49912e-53	2.96931e-49
SARAF	0.993	1	-0.770833	3.17739e-62	6.29345e-58
RPL18A	0.998	1	-0.794132	2.45138e-102	4.85545e-98
ARID5A	0.335	0.782	-0.794408	7.12595e-50	1.41144e-45
RPS6	0.998	0.998	-0.795606	3.40404e-95	6.74238e-91
RPL9	0.988	0.997	-0.796064	4.70308e-90	9.31539e-86
RPS18	1	1	-0.800334	7.71407e-105	1.52793e-100
RPSA	0.995	1	-0.803018	1.15063e-93	2.27905e-89
RPS12	1	1	-0.816972	6.60345e-117	1.30795e-112
RPL13A	0.988	1	-0.820901	3.80427e-73	7.53512e-69
RPS25	0.998	1	-0.827262	4.49646e-114	8.90614e-110
ARMH1	0.05	0.477	-0.839205	1.97592e-58	3.91371e-54
NME2	0.903	0.992	-0.840653	1.25642e-69	2.48859e-65
USP3	0.724	0.907	-0.857179	2.48652e-41	4.92505e-37
RPL36A	0.972	1	-0.868259	9.6601e-103	1.91338e-98
DDIT4	0.472	0.794	-0.874945	1.94903e-32	3.86045e-28
CRYBG1	0.347	0.769	-0.877276	2.68099e-48	5.31024e-44
RILPL2	0.526	0.833	-0.889019	6.50742e-42	1.28893e-37
PABPC1	0.988	1	-0.891887	4.69168e-85	9.29281e-81
EEF1B2	0.955	0.998	-0.898833	8.90351e-84	1.76352e-79
RPL27A	0.943	0.995	-0.929017	7.98568e-93	1.58172e-88
RPS8	1	1	-0.935686	5.10196e-153	1.01054e-148
SATB1	0.344	0.779	-0.949948	1.92663e-51	3.81608e-47
RPL10A	0.986	1	-0.956255	3.33269e-111	6.60107e-107
IL7R	0.347	0.868	-0.962411	2.46461e-68	4.88165e-64
GYPC	0.84	0.976	-0.984314	4.74492e-70	9.39827e-66
RPS2	1	1	-1.00793	1.2498e-104	2.47548e-100
TMEM123	0.738	0.975	-1.07415	5.09611e-87	1.00939e-82
IGFBP4	0.033	0.616	-1.12209	9.54997e-95	1.89156e-90
SLC2A3	0.712	0.949	-1.20422	1.39294e-67	2.759e-63
LTB	0.592	0.943	-1.22812	4.01032e-64	7.94324e-60
IFITM3	0.238	0.702	-1.2963	1.39118e-58	2.75551e-54
FKBP5	0.16	0.777	-1.30685	2.46832e-101	4.889e-97
LEF1	0.094	0.769	-1.35125	1.79229e-115	3.54998e-111
LDLRAD4	0.335	0.862	-1.38001	4.36593e-88	8.6476e-84
MT1G	0.042	0.437	-1.40103	2.01936e-52	3.99975e-48
MT2A	0.861	0.99	-1.41927	7.48725e-84	1.483e-79
CCR7	0.078	0.794	-1.42667	4.797e-126	9.50143e-122
TSHZ2	0.163	0.757	-1.48678	3.33014e-88	6.59601e-84
SESN3	0.12	0.732	-1.55268	1.35097e-96	2.67588e-92
RPS4Y1	0.165	0.696	-1.65663	2.22776e-71	4.41253e-67
PLAC8	0.382	0.953	-2.17243	2.03761e-152	4.03589e-148
TCF7	0.165	0.958	-2.28043	4.92953e-204	9.76392e-200

## Sheet: Table_S2C
Supplementary Table 2C. Significantly up- and down-regulated genes in IL21+ versus GZMB+ cells.
Genes	Fraction expressed in IL21+ cells	Fraction expressed in GZMB+ cells	Average log2 Fold Change	p-value	Adjusted p-value
LGMN	0.632	0.355	0.817237	3.35981e-15	6.65477e-11
IL21	1	0	0.809676	1.00086e-178	1.98239e-174
MT1G	0.1	0.026	0.673256	1.20548e-07	0.00238769
TOX2	0.637	0.345	0.531887	7.89242e-17	1.56325e-12
TNFRSF4	0.677	0.449	0.531698	1.60293e-10	3.17493e-06
PELI1	0.91	0.728	0.441934	2.68971e-11	5.32751e-07
TSHZ2	0.343	0.183	0.432983	7.61895e-07	0.0150908
SNX9	0.965	0.879	0.40447	7.48298e-09	0.000148215
HSPE1	0.99	0.919	0.39985	2.2178e-11	4.3928e-07
LDLRAD4	0.637	0.421	0.38407	1.32606e-07	0.00262654
TNFRSF1B	0.98	0.96	0.381512	1.90525e-07	0.00377372
CDK6	0.826	0.583	0.371897	9.50217e-11	1.88209e-06
GRAMD1B	0.756	0.515	0.348252	6.59814e-10	1.30689e-05
RPL22L1	0.96	0.894	0.338963	1.19543e-06	0.0236779
CCND2	0.731	0.538	0.338811	1.84187e-06	0.0364819
PEBP1	0.95	0.851	0.33586	3.82855e-08	0.000758321
SOD1	0.985	0.945	0.330425	3.76235e-08	0.000745208
PRDX1	0.985	0.947	0.327869	4.28142e-08	0.000848021
HSPD1	0.97	0.881	0.307625	2.16205e-06	0.0428238
PKM	0.975	0.93	0.305274	8.53283e-07	0.016901
PIM2	0.95	0.811	0.29609	4.95401e-08	0.000981241
JPT1	1	0.968	0.286565	6.4566e-07	0.0127886
PTPN11	0.92	0.779	0.279285	5.03773e-07	0.00997824
VOPP1	0.94	0.819	0.276514	3.94694e-07	0.0078177
RAB27A	0.97	0.902	0.276464	1.08217e-06	0.0214345
LINC01480	0.318	0.132	0.271904	2.08751e-07	0.00413474
PTPN2	0.98	0.86	0.266467	1.86408e-09	3.69218e-05
PFKL	0.806	0.572	0.262973	3.6012e-09	7.1329e-05
CRYBG1	0.726	0.534	0.260565	2.32426e-06	0.0460367
GPX4	0.94	0.809	0.255791	2.81985e-07	0.00558527
SYT11	0.667	0.489	0.245819	2.43842e-06	0.0482977
UBE2E1	0.896	0.717	0.237626	1.19633e-07	0.00236958
WSB2	0.796	0.587	0.213778	5.50027e-07	0.0108944
ZC3H12D	0.557	0.315	0.210136	3.48243e-08	0.000689765
ITGB7	0.856	0.672	0.20602	1.8873e-06	0.0373817
PHEX	0.363	0.179	0.187837	2.34885e-06	0.0465237
ODF3B	0.642	0.389	0.164207	8.90542e-09	0.00017639
EIF1AY	0.104	0.011	0.15584	1.4764e-07	0.00292431
IL6ST	0.811	0.611	0.15487	1.10424e-06	0.0218716
IL6R	0.244	0.085	0.134966	4.12351e-07	0.00816743
BCAT1	0.204	0.053	0.127148	4.55383e-08	0.000901978
COL5A3	0.194	0.049	0.122088	1.09812e-07	0.00217504
POU3F1	0.109	0.011	0.0835796	9.82373e-08	0.00194579
GLCCI1	0.831	0.662	0.0283815	9.40728e-07	0.018633
SH3BGRL3	1	1	-0.215618	2.12786e-06	0.0421465
S100A4	0.995	0.998	-0.251318	1.55825e-07	0.00308643
S100A10	1	1	-0.270227	1.39983e-06	0.0277265
EFHD2	0.96	0.945	-0.303886	2.47531e-08	0.000490285
GSTK1	1	0.972	-0.305788	1.23904e-09	2.45416e-05
LITAF	0.98	0.985	-0.379747	1.1097e-09	2.19798e-05
LYAR	0.92	0.947	-0.395479	2.57241e-08	0.000509517
CLEC2B	0.91	0.951	-0.396315	4.17912e-07	0.00827757
ANXA1	0.925	0.991	-0.407009	1.06777e-11	2.11493e-07
CD44	0.985	0.987	-0.467575	7.25983e-09	0.000143796
HCST	1	0.996	-0.477753	1.06379e-14	2.10705e-10
TNFAIP3	0.955	0.962	-0.483997	6.43464e-07	0.0127451
SAMD3	0.776	0.881	-0.497484	4.99892e-16	9.90137e-12
CLDND1	0.841	0.834	-0.501373	6.95736e-07	0.0137804
VPS37B	0.692	0.849	-0.524933	3.33748e-13	6.61055e-09
CEBPD	0.552	0.743	-0.594334	2.64614e-09	5.24121e-05
HOPX	0.338	0.547	-0.676637	7.83684e-10	1.55224e-05
PRF1	0.846	0.972	-0.715421	5.00314e-21	9.90972e-17
GZMK	0.647	0.785	-0.817649	2.74803e-08	0.000544302
NKG7	0.881	0.987	-1.13542	8.28325e-30	1.64066e-25
CCL5	0.886	0.989	-1.2911	9.61811e-31	1.90506e-26
GZMH	0.448	0.883	-1.29558	1.76586e-36	3.49764e-32
CCL4	0.358	0.553	-1.30093	1.28681e-06	0.0254878
GZMA	0.771	0.974	-1.34239	6.77618e-37	1.34216e-32
GZMB	0	1	-2.84239	1.00086e-178	1.98239e-174
GNLY	0.045	0.228	-3.31018	5.14735e-11	1.01954e-06

## Sheet: Table_S2D
Supplementary Table 2D. GeneList used for GSEA analysis.
Cytotoxic CD4 (Patil et al., 2018)	Interferon Response (Seumois et al., 2020)
KLRD1	IFI6
ASCL2	MX1
CMKLR1	IFI44L
CD8B	ISG20
SPON2	ISG15
GPR56	LY6E
PRF1	IFIT3
CCL4	MX2
GZMB	XAF1
NKG7	OAS3
RP11-81H14.2	EIF2AK2
FASLG	SAMD9L
CST3	EPSTI1
EFHD2	IFITM1
CTSW	OAS1
FGR	STAT1
TTC38	SAMD9
TBX21	IFIT1
FGFBP2	RNF213
OGN	USP18
CST7	IFI44
METRN	SP100
PRSS23	IFI35
GPR114	BST2
GNLY	PLSCR1
GZMH	TRIM22
ERBB2	RSAD2
CD8A	HERC6
MATK	SP110
CCL3	IRF7
TTC16	OAS2
PLEK	PARP14
S1PR5	CMPK2
TYROBP	PARP9
OSBPL5	GBP1
SLAMF7	OASL
TGFBR3	DDX60
LILRB1	PSMB9
F2R	IFIH1
C1orf21	DDX58
BZRAP1	NUB1
SLC27A3	IFIT2
ENC1	ADAR
SETBP1	PSME2
USP28	LAMP3
CX3CR1	TNFSF10
SH3RF2	NMI
RGS9	UBE2L6
PROK2	APOL6
ABI3	PSME1
ZNF683	LAP3
LAIR2	GBP4
ARHGAP26	STAT2
IFNG	B2M
PLOD1	IRF1
FADS1	IFITM3
ZEB2	PSMB8
AKR1C3	PNPT1
ADAP1	HLA-C
CCL5	MT2A
COLGALT2	GBP5
C12orf75	IRF9
SAMD3	IFITM2
CLIC3	SAMHD1
SBK1	HLA-A
GZMA	TAP1
PRR5L	CXCL10
KLRG1	TRIM25
GAB3	RTP4
PPP2R2B	TMEM140
PIK3AP1	PML
SLC2A8	TRIM38
CHST12	TRIM21
SCD5	ZBP1
ADRB2	DHX58
GPR141	TAPBP
APMAP	PARP12
MXRA7	LGALS3BP
ITGAM	GBP3
AC004840.9	ELF1
OASL	ZNFX1
CEP78	GBP2
AOAH	IRF2
MAN1A1	CD38
TBKBP1	RBCK1
GFI1	TRIM14
SLC15A4	MYD88
SLCO4C1	NCOA3
AC092580.4	CNP
CRIM1	CXCL11
RUNX3	TRAFD1
FGL2	LYSMD2
PTGDR	MOV10
HLA-DPA1	CASP1
WIPI1	CASP4
RP3-467K16.4	HLA-F
APOBEC3G	OGFR
PLEKHF1	CD274
SLC15A2	SOCS1
PIK3R3	NLRC5
TESC	JAK1
PALLD	IFI27
HLA-DPB1	CD74
GFOD1	GCH1
TPST2	IL15RA
LLGL2	PSMA3
FAM46A	TDRD7
HDAC9	TXNIP
F8A1	TRIM5
SUSD1	TRIM26
PTCH1	CASP7
CRTAM	CD47
GSE1	IFI30
RP11-25K19.1	PTPN1
PATL2	JAK2
RP4-728D4.2	PSMB10
IL10	HLA-E
RPL39L	IL15
CTB-91J4.1	MVP
CORO1C	FAS
GK5	HIF1A
RASSF1	VAMP5
TSPAN2	WARS
FUT11	CFH
GNPTAB	RIPK2
CD300A	STAT3
PLA2G16	CASP8
RAP2A	EIF4E3
RHBDF2	VAMP8
DOCK5	UBA7
SLC2A6	IL10RA
ALYREF	PIAS1
SAP30	IRF3
PPP1R14C	NCOA7
RAB27B	NOD1
B4GALT5	CAMK2G
GZMM	ARL4A
MTSS1	SPPL2A
MAP3K8	RNF31
C11orf21	IRF5
LGALS1	SLAMF7
KIAA2013	HLA-B
LINC00265	SECTM1
SERTAD3	ITGB7
SLC25A20	FAM46A
SLC2A1	TOR1B
PTPRE	SELL
EPHX4	CSF1
LAIR1	TRIM35
MIR4435-1HG	CD69
ARL15	SOCS3
TFDP2	PIM1
MT1E	RAPGEF6
RHOC	IFNAR1
TSPAN32	RNASEL
STK39	RIPK1
FNDC3B	SOD2
SLC25A4	IL18BP
PPM1L	PTPN2
RNPEPL1	TRIM46
CD81	IL2RB
YPEL1	PRKCD
MCTP2	HLA-G
MIAT	PDE4B
PRR5	AUTS2
HLA-DRB5	ST3GAL5
FEZ1	PTPN6
IFIT2	TRIM68
ABHD17B	CDKN1A
SNTB2	IP6K2
DPY19L1	LPAR6
ZNF365	CASP3
RAB27A	BPGM
EPS8L1	ICAM1
RP11-337C18.8	ISOC1
CTBP2	NUP93
PLXND1	PSMB2
FAM179A	GZMA
PHLDB2	SLC25A28
AGPAT4	ARID5B
SLC25A29	P2RY14
AXIN1	GPR18
ACTN4	LCP2
CERCAM	TRIM62
STX7	HLA-DMA
RNF187	CD86
SYTL3	TRIM8
TFEB	TYK2
AGAP1	PFKP
HOMER1	EGR1
PYHIN1	LATS2
APOBEC3C	CCL5
LAG3	PNP
EXTL2	ABCE1
SYNE1	CAMK2D
LPCAT1	IL4R
TGFBR1	STAT4
HOPX	IFNGR2
PTPN18	PELI1
CTSC	IFNG
PSTPIP2	PTPN11
JAKMIP1	SRI
GLB1L2	IFNGR1
SSBP3	SUMO1
ERMN	FGL2
CARNS1	HLA-DPA1
RP11-160H22.5	HLA-DQA1
FANCL	IRF8
CTB-58E17.1	IFNAR2
TMCC3	HLA-DRA
ABCB10	TNFAIP3
ZFYVE26	UPP1
SMKR1	HLA-DRB5
MSC	NFKB1
PLEKHG3	XCL1
EOMES	IRF4
HAVCR2	HLA-DPB1
LITAF	CD44
DTHD1	HLA-DQB1
ZBTB32	HLA-DRB1
APOBEC3H	ST8SIA4
PTPN12	MTHFD2
JAZF1	NFKBIA
PTPRJ	BTG1
LYZ	NAMPT
KIF15	CCRL2
RAB37	GMPR
ATG4D	IL7
SERTAD1	PROCR
CCDC102A	CAMK2B
ABHD17C	HLA-DQA2
SPN	HLA-DQB2
MAP2K2	CIITA
MYO1F	TRIM2
TOX	TRIM45
IGF2R	TRIM3
COL6A2	TRIM31
IL8	TRIM34
SYTL2	NCAM1
AGTRAP	CD40
ASL	CMKLR1
CAMK2N1	CXCL9
RRBP1	SELP
B3GALT6
MTERFD3
SESN2
ENPP4
TP53I11
FAM120C
MRPL10
ATMIN
SCCPDH
OGFRL1
FOSL2
C9orf142
HENMT1
RHEBL1
PTPRM
CAV1
CAPNS1
PRKCE
STRN
MYO6
VCL
RAB11FIP4
ITPRIPL1
PHC2
APLP2
ID2
ZBTB2
GLUL
ITGAL
EIF4G3
CCDC112
HLA-DMA
CPT1A
CD63
RAPGEF1
FAM3C
RP11-66N11.8
DUS1L
PAM
ATP2B4
NPRL2
CISD3
PLEKHO2
KIAA1715
DIP2A
LASP1
KLF13
CD320
MYBL1
CTSD
RAP1B
PON2
GALNT1
RALGDS
KEAP1
LINC00152
ZNF699
ARHGAP10
TRAK1
GSTP1
SLC20A1
SGPP1
RGS3
RMND5A
HCST
RPTOR
SH3BP2
GATS
EBP
ZBP1
TBC1D19
SH3BGRL3
SLAMF6
BATF
MEGF9
PTP4A2
GNG2
IKBKG
MT2A
LYST
CD151
OTUD7B
IVD
DNAJC21
FBXO6
PI4K2A
CALHM2
RP11-162A12.2
MAD2L2
CD58
SLC35B2
TNFRSF1A
USP11
SLC30A4
AC093673.5
BHLHE40
RRAS2
PPP1R18
KIF21B
ADAM8
LYAR
CLIC1
PRDM1
HCFC2
TESK1
UAP1
MAP2K3
NPC1
ANXA4
GEMIN7
YIPF2
ITGB2
ARHGAP25
GALNT10
SPATA20
ERV3-1
A2M-AS1
FHOD1
C5orf56
CCDC92
RAP1GAP2
MSN
SCYL2
STK11IP
CDK2AP2
PTPN22
PLEKHA2
DYRK1A
SIRT2
DNAJC1
APEX2
FBXL6
UBE2Q1
TSEN54
ARAP2
SDF2L1
SH2D3C
SNX11
CCZ1B
LTBP4
H6PD
FLNA
ABHD17A
MAP4K5
DUSP22
FBXW5
SLC9A3R1
TRAPPC10
THEMIS2
ALKBH4
TAPBPL
WSB2
GABARAPL1
CNNM3
GSAP
ELF4
GPAA1
CTDSP1
APOBEC3D
CDC42EP3
PREX1
SYT11
ARHGAP18
FAF1
MMAA
GLTSCR1L
DNASE2
C20orf24
TNFRSF1B
PRKCB
LEMD2
FAM228B
NCOA1
UBE2E3
SMUG1
SASH3
GALNT2
ZNF276
ZNF600
CDCA4
MYO1G
CYBA
GTF3C1
LTB4R
GATAD1
CYC1
RAB1B
RUSC1
CYTH4
CDC16
NFATC3
SRRT
NFATC2
PGP
POP7
PTTG1
TMEM181
FAM53B
NADK
KIF21A
MAST3
CCND3
SRGN
TPP1
RIPK2
