# Supplementary material for: Distinct features of a peripheral T-helper subset that drives B cell response in dengue virus infection
Source: Research Square preprint supplement (doi:10.21203/rs.3.rs-3886693/v1), 2024-02-01
Supplement: Supplementary file 2 [file 2867f7b9bc46d39bfbcd0560.xlsx]

## Sheet: Table_S1
Supplementary Table 1. Summary of study participants.
	Acute Dengue Patients
No. of participants (n)	170
No. of samples (n)	186
Age (years), Range	14 – 67
	(median = 27, IQR = 16)
Gender
Female (%)	37% (63/170)
Male (%)	63% (107/170)
Residency
Delhi-NCR (%)	85% (145/170)
Outer Delhi-NCR (%)	15% (25/170)
	Dengue without Warning Signs	Dengue + Warning Signs	Severe Dengue
Infection Category
Primary Infection	51% (19/37)	40% (47/116)	24% (8/33)
Secondary Infection	49% (18/37)	60% (69/116)	76% (25/33)
Clinical Symptoms/ Physical Examinations
Days post-symptom onset	2 – 11	2 – 16	5 – 24
	(median = 5, IQR = 3)	(median = 6, IQR = 2)	(median = 8, IQR = 4)
Fever	73% (27/37)	43% (50/116)	36% (12/33)
Chills	60% (22/37)	46% (53/116)	51% (17/33)
Cough	16% (6/37)	17% (20/116)	21% (7/33)
Headache	73% (27/37)	58% (67/116)	58% (19/33)
Retro-orbital Pain	49% (18/37)	39% (45/116)	39% (13/33)
Myalgia	46% (17/37)	55% (64/116)	33% (11/33)
Arthralgia	35% (13/37)	26% (30/116)	21% (7/33)
Rashes	51% (19/37)	48% (56/116)	45% (15/33)
Nausea	22% (8/37)	19% (22/116)	27% (9/33)
Persistent Vomiting	0% (0/37)	63% (73/116)	54% (18/33)
Abdominal Pain	0% (0/37)	48% (56/116)	48% (16/33)
Liver Enlargement	0% (0/37)	1% (1/116)	12% (4/33)
Spleenomegly	0% (0/37)	3% (3/116)	3% (1/33)
Clinical fluid Accumulation
Gall-bladder Edema	0% (0/37)	22% (25/116)	52% (17/33)
Pedal Edema	0% (0/37)	2% (2/116)	6% (2/33)
Ascites	0% (0/37)	16% (19/116)	58% (19/33)
Mucosal Bleed
Gum Bleed	0% (0/37)	12% (14/116)	15% (5/33)
Nose Bleed	0% (0/37)	2% (2/116)	15% (5/33)
Severe Plasma Leakage
Pleural Effusion	0% (0/37)	0% (0/116)	42% (14/33)
Respiratory Distress (ARDS)	0% (0/37)	0% (0/116)	15% (5/33)
Shock Syndrome	0% (0/37)	0% (0/116)	9% (3/33)
Severe Bleeding
Gastro-intestinaI Bleed	0% (0/37)	0% (0/116)	27% (9/33)
Vaginal Bleed	0% (0/37)	3% (3/116)	6% (2/33)
Rectal Bleed	0% (0/37)	0% (0/116)	6% (2/33)
Icterus	0% (0/37)	2% (2/116)	15% (5/33)
Hematemesis	0% (0/37)	3% (4/116)	21% (7/33)
Hemoptysis	0% (0/37)	0% (0/116)	9% (3/33)
Hematuria	0% (0/37)	1% (1/116)	3% (1/33)
Malena	0% (0/37)	9% (10/116)	27% (9/33)
Organ Involvement
Hepatitis	0% (0/37)	0% (0/116)	15% (5/33)
Encephalitis	0% (0/37)	0% (0/116)	24% (8/33)
Acute Kidney Failure	0% (0/37)	0% (0/116)	24% (8/33)
Pancreatitis	0% (0/37)	0% (0/116)	0% (0/33)
Comorbidities/ History
Diabetes Mellitus	3% (1/37)	2% (2/116)	3% (1/33)
Hypertension	0% (0/37)	2% (2/116)	6% (2/33)
Hypothyroidism	0% (0/37)	2% (2/116)	0% (0/33)
Asthma	3% (1/37)	0% (0/116)	0% (0/33)
Chronic Kidney Disease	0% (0/37)	1% (1/116)	9% (3/33)
Sinus Bradycardia. Heart related	0% (0/37)	3% (4/116)	0% (0/33)
Aplastic Anemia	3% (1/37)	0% (0/116)	3% (1/33)
Chronic Hepatitis A/B/C	3% (1/37)	0% (0/116)	3% (1/33)
Smoking/ Alcohol/ Tobacco	3% (1/37)	0% (0/116)	6% (2/33)
Blood Cell Count and Biochemical Reports (mean ± SEM)
Hematocrit [%]	41.6 ± 1.0	38.7 ± 0.7	35.8 ± 1.6
Platelets [count/µL]	82000 ± 8000	62000 ± 6000	44000 ± 7000
WBC [count/µL]	4500 ± 500	6200 ± 400	8100 ± 1000
ALP [IU/L]	227 ± 30	290 ± 25	450 ± 60
ALT [IU/L]	98 ± 21	117 ± 15	400 ± 120
AST [IU/L]	124 ± 24	190 ± 30	600 ± 170
Bilirubin [mg/dL]	0.56 ± 0.07	0.93 ± 0.12	1.98 ± 0.42
Creatinine [mg/dL]	0.8 ± 0.05	1.1 ± 0.16	2.6 ± 0.70
Urea [mg/dL]	22.1 ± 3.5	31.3 ± 4.0	69.7 ± 12.4
Albumin [g/dL]	3.5 ± 0.4	3.4 ± 0.1	2.9 ± 0.1
	Healthy Donors
No. of participants (n)	94
No. of samples (n)	94
Age (years), Range	20 – 52
	(median = 30, IQR = 10)
Gender
Female (%)	1% (1/94)
Male (%)	99% (93/94)
Residency
Delhi-NCR (%)	82% (77/94)
Outer Delhi-NCR (%)	18% (17/94)
	LN Tissue Donors
No. of participants (n)	10
No. of samples (n)	10
Age (years), Range	7 – 62
	(median = 29, IQR = 44)
Gender
Female (%)	50% (5/10)
Male (%)	50% (5/10)
Residency
Delhi-NCR (%)	100% (10/10)
Outer Delhi-NCR (%)	0% (0/10)
