# Supplementary material for: Distinct features of a peripheral T-helper subset that drives B cell response in dengue virus infection
Source: Research Square preprint supplement (doi:10.21203/rs.3.rs-3886693/v1), 2024-02-01
Supplement: Supplementary file 3 [file 3388bf419ae419d394cbff60.xlsx]

## Sheet: INDEX
Supplementary Table 4: List of antibodies used in flow cytometry, cell sorting, 10x genomics experiment.
A - Panels of antibodies used for T and B cell phenotyping.
B - Panels of antibodies used for analysis in stimulation/coculture assays.
C - Panels of antibodies used for FACS sorting in stimulation/coculture and single cell RNAseq assays.
D - Panels of antibodies used for CSP analysis and Hashtag in single cell RNAseq assay.

## Sheet: Table_S4A
Supplementary Table 4A. Panels of antibodies used for T and B cell phenotyping.
Marker	Fluorochrome	Clone	Catalogue	Vendore
Tfh and CXCR5–PD-1+ T cell analysis
Fixable viability dye	eFluor 780	-	65-0865-14	eBioscience
CD14	APC-eFluor 780	61D3	47-0149-42	eBioscience
CD16	APC-eFluor 780	eBioCB16	47-0168-42	eBioscience
CD20	APC-eFluor 780	2H7	47-0209-42	eBioscience
CD4	Alexa Fluor 700	RPA-T4	300526	BioLegend
CD8a	APC	RPA-T8	301049	BioLegend
CXCR5	Brilliant Violet 421	J252D4	356920	BioLegend
CD45RA	Brilliant Violet 785	HI100	304140	BioLegend
PD-1	PE/Dazzle 594	EH12.2H7	329940	BioLegend
ICOS	FITC	C398.4A	11-9949-82	eBioscience
Ki67, intranuclear	PE	SolA15	12-5698-82	eBioscience
CD38	Brilliant Violet 510	HIT2	303540	BioLegend
HLA-DR	Brilliant Violet 560	L243	307650	BioLegend
CXCR3	Brilliant Violet 711	G025H7	353732	BioLegend
CCR6	PE/Cyanine7	G034E3	353418	BioLegend
Treg cell analysis
Fixable viability dye	eFluor 780	-	65-0865-14	eBioscience
CD14	APC-eFluor 780	61D3	47-0149-42	eBioscience
CD16	APC-eFluor 780	eBioCB16	47-0168-42	eBioscience
CD20	APC-eFluor 780	2H7	47-0209-42	eBioscience
CD8a	APC-eFluor 780	RPA-T8	47-0088-42	eBioscience
CD4	Alexa Fluor 700	RPA-T4	300526	BioLegend
CXCR5	Alexa Fluor 647	RF8B2	558113	BD Biosciences
CD45RA	Brilliant Violet 785	HI100	304140	BioLegend
PD-1	Brilliant Violet 421	EH12.2H7	329920	BioLegend
CD25	PE-CF594	M-A251	562403	BD Biosciences
Foxp3, intranuclear	PE	PCH101	12-4777-42	eBioscience
Plasmablast B cell analysis
Fixable viability dye	eFluor 780	-	65-0865-14	eBioscience
CD14	APC-eFluor 780	61D3	47-0149-42	eBioscience
CD16	APC-eFluor 780	eBioCB16	47-0168-42	eBioscience
CD3	APC/Cyanine7	HIT3a	300318	BioLegend
CD19	Brilliant Violet 785	HIB19	302240	BioLegend
CD20	PE/Cyanine7	2H7	302312	BioLegend
CD27	PE/Dazzle 594	M-T271	356422	BioLegend
CD38	Brilliant Violet 421	HIT2	303526	BioLegend
IgD	FITC	IA6-2	348206	BioLegend
CD71	APC	CY1G4	334108	BioLegend
CXCR3	Brilliant Violet 711	G025H7	353732	BioLegend
Ki67, intranuclear	PE	SolA15	12-5698-82	eBioscience
Extrafollicular B cell analysis
Fixable viability dye	eFluor 780	-	65-0865-14	eBioscience
CD14	APC-eFluor 780	61D3	47-0149-42	eBioscience
CD16	APC-eFluor 780	eBioCB16	47-0168-42	eBioscience
CD3	APC/Cyanine7	HIT3a	300318	BioLegend
CD19	Brilliant Violet 785	HIB19	302240	BioLegend
CD21	PE/Cyanine7	Bu32	354912	BioLegend
CD27	PE/Dazzle 594	M-T271	356422	BioLegend
CD38	Brilliant Violet 510	HIT2	303540	BioLegend
CXCR5	Brilliant Violet 421	J252D4	356920	BioLegend
IgD	FITC	IA6-2	348206	BioLegend
CD11c	PE	S-HCL-3	371504	BioLegend
CD24	APC	ML5	311118	BioLegend

## Sheet: Table_S4B
Supplementary Table 4B. Panels of antibodies used for analysis in stimulation/coculture assays.
Marker	Fluorochrome	Clone	Catalogue	Vendore
AIM assay
Fixable viability dye	eFluor 780	-	65-0865-14	eBioscience
CD14	APC-eFluor 780	61D3	47-0149-42	eBioscience
CD16	APC-eFluor 780	eBioCB16	47-0168-42	eBioscience
CD20	APC-eFluor 780	2H7	47-0209-42	eBioscience
CD8a	APC-eFluor 780	RPA-T8	47-0088-42	eBioscience
CD4	Alexa Fluor 700	RPA-T4	300526	BioLegend
CXCR5	Brilliant Violet 421	J252D4	356920	BioLegend
CD45RA	Brilliant Violet 785	HI100	304140	BioLegend
PD-1	PE	EH12.2H7	329906	BioLegend
OX40	PE/Cyanine7	Ber-ACT35	350012	BioLegend
CD25	APC	M-A251	555434	BD Biosciences
ICOS	PE-CF594	C398.4A	565888	BD Biosciences
CXCR3	Brilliant Violet 711	G025H7	353732	BioLegend
CCR6	Alexa Fluor 488	G034E3	353414	BioLegend
ICS assay (CD40L/IFNγ/IL10)
Fixable viability dye	eFluor 780	-	65-0865-14	eBioscience
CD14	APC-eFluor 780	61D3	47-0149-42	eBioscience
CD16	APC-eFluor 780	eBioCB16	47-0168-42	eBioscience
CD20	APC-eFluor 780	2H7	47-0209-42	eBioscience
CD8a	APC-eFluor 780	RPA-T8	47-0088-42	eBioscience
CD4	Alexa Fluor 700	RPA-T4	300526	BioLegend
CXCR5	Alexa Fluor 647	RF8B2	558113	BD Biosciences
CD45RA	Brilliant Violet 785	HI100	304140	BioLegend
PD-1	Brilliant Violet 711	EH12.2H7	329928	BioLegend
CXCR3	Alexa Fluor 488	G025H7	353710	BioLegend
CCR6	PE	11A9	559562	BD Biosciences
CD40L, intracellular	PE/Cyanine7	24-31	310832	BioLegend
IFN-γ, intracellular	PE-CF594	B27	562392	BD Biosciences
IL10, intracellular	Brilliant Violet 421	JES3-9D7	564053	BD Biosciences
ICS assay (IL21/GZMB)
Fixable viability dye	eFluor 780	-	65-0865-14	eBioscience
CD4	Alexa Fluor 700	RPA-T4	300526	BioLegend
CD40L, intracellular	PE/Cyanine7	24-31	310832	BioLegend
IFN-γ, intracellular	PE-CF594	B27	562392	BD Biosciences
IL21, intracellular	Alexa Fluor 647	3A3-N2.1	560493	BD Biosciences
GZMB, intracellular	PE	JES3-9D7	561142	BD Biosciences
T-B coculture assay
Fixable viability dye	eFluor 506	-	65-0866-14	eBioscience
CD19	Brilliant Violet 785	HIB19	302240	BioLegend
CD3	APC/Cyanine7	HIT3a	300318	BioLegend
CD27	PE/Dazzle 594	M-T271	356422	BioLegend
CD20	PE/Cyanine7	2H7	302312	BioLegend
CD38	PE/Cyanine5	HIT2	555461	BD Biosciences

## Sheet: Table_S4C
Supplementary Table 4C. Panels of antibodies used for FACS sorting in stimulation/coculture and single cell RNAseq assays.
Marker	Fluorochrome	Clone	Catalogue	Vendore
ELISPOT/FluoroSpot FACS sorting
Fixable viability dye	eFluor 780	-	65-0865-14	eBioscience
CD14	APC-eFluor 780	61D3	47-0149-42	eBioscience
CD16	APC-eFluor 780	eBioCB16	47-0168-42	eBioscience
CD20	APC-eFluor 780	2H7	47-0209-42	eBioscience
CD4	Alexa Fluor 700	RPA-T4	300526	BioLegend
CD45RO	FITC	UCHL1		BD Biosciences
CXCR5	Alexa Fluor 647	RF8B2	558113	BD Biosciences
T-B coculture FACS sorting
Fixable viability dye	eFluor 506	-	65-0866-14	eBioscience
CD14	PE	MΦP9	562691	BD Biosciences
CD20	PE/Cyanine7	2H7	302312	BioLegend
CD27	PE/Dazzle 594	M-T271	356422	BioLegend
CD4	Alexa Fluor 700	RPA-T4	300526	BioLegend
CD45RO	FITC	UCHL1	555492	BD Biosciences
CD25	PE-CF594	M-A251	562403	BD Biosciences
CXCR5	Alexa Fluor 647	RF8B2	558113	BD Biosciences
PD-1	Brilliant Violet 421	EH12.2H7	329920	BioLegend
Single cell RNAseq FACS sorting
Fixable viability dye	eFluor 780	-	65-0865-14	eBioscience
CD14	APC-eFluor 780	61D3	47-0149-42	eBioscience
CD16	APC-eFluor 780	eBioCB16	47-0168-42	eBioscience
CD20	APC-eFluor 780	2H7	47-0209-42	eBioscience
CD8a	APC-eFluor 780	RPA-T8	47-0088-42	eBioscience
CD4	Alexa Fluor 700	RPA-T4	300526	BioLegend
ICOS	PE-CF594	C398.4A	565888	BD Biosciences
CD38	Brilliant Violet 510	HIT2	303540	BioLegend

## Sheet: Table_S4D
Supplementary Table 4D. Panels of antibodies used for CSP analysis and Hashtag in single cell RNAseq assay.
Marker	Oligo Tag	Clone	Catalogue	Vendore
CSP analysis
CXCR5	TotalSeq C0144	J252D4	356939	BioLegend
PD-1	TotalSeq C0088	EH12.2H7	329963	BioLegend
CD27	TotalSeq C0154	O323	302853	BioLegend
CXCR3	TotalSeq C0140	G025H7	353747	BioLegend
CCR6	TotalSeq C0143	G034E3	353440	BioLegend
CCR4	TotalSeq C0071	L291H4	359425	BioLegend
Hashtag
Hashtag 2	TotalSeq C0252	LNH-94; 2M2	394663	BioLegend
Hashtag 3	TotalSeq C0253	LNH-94; 2M2	394665	BioLegend
Hashtag 4	TotalSeq C0254	LNH-94; 2M2	394667	BioLegend
