# Supplementary material for: Distinct features of a peripheral T-helper subset that drives B cell response in dengue virus infection
Source: Research Square preprint supplement (doi:10.21203/rs.3.rs-3886693/v1), 2024-02-01
Supplement: Supplementary file 4 [file 4adc22b5b7aa742b4b389764.xlsx]

## Sheet: Table_S3
Supplementary Table 3. Details of expandable TCR clonotypes (n=231).
Clonotype No.	TCRα gene	TCRβ gene	TCRα aa sequence	TCRβ aa sequence	TCRα nt sequence	TCRβ nt sequence	9	8	5	6	3	1	4	0	2	7	Clonal size	Abundance	Expandability
clonotype 56	TRAV13-1.TRAJ49.TRAC	TRBV2.NA.TRBJ2-1.TRBC2	CAAIQNQFYF	CASSEELAGVGEQFF	TGTGCAGCAATACAGAACCAGTTCTATTTT	TGTGCCAGCAGTGAAGAGCTAGCGGGAGTTGGTGAGCAGTTCTTC	0	0	109	81	260	291	147	1	56	0	945	0.216693	Hyperexpanded (100 < X <= 1000)
clonotype 142	TRAV29/DV5.TRAJ29.TRAC	TRBV11-2.TRBD2.TRBJ2-1.TRBC2	CAASAPNSGNTPLVF	CASSSGLAGGNEQFF	TGTGCAGCAAGCGCGCCGAATTCAGGAAACACACCTCTTGTCTTT	TGTGCCAGCAGCTCGGGACTAGCGGGGGGGAATGAGCAGTTCTTC	2	0	32	13	3	4	4	0	0	0	58	0.0132997	Large (20 < X <= 100)
clonotype 18	TRAV12-1.TRAJ26.TRAC	TRBV12-4.TRBD1.TRBJ2-7.TRBC2	CAVNYGQNFVF	CASSLNDRGLDEQYF	TGTGCGGTGAACTATGGTCAGAATTTTGTCTTT	TGTGCCAGCAGTTTAAATGACAGGGGGCTGGACGAGCAGTACTTC	0	0	16	2	17	11	0	0	1	0	47	0.0107773	Large (20 < X <= 100)
clonotype 102	TRAV21.TRAJ52.TRAC	TRBV5-1.TRBD1.TRBJ1-1.TRBC1	CAVRFGGGTSYGKLTF	CASSRQGAGGTEAFF	TGTGCTGTGAGATTTGGTGGTGGTACTAGCTATGGAAAGCTGACATTT	TGCGCCAGCAGCCGCCAGGGGGCCGGGGGAACTGAAGCTTTCTTT	0	0	21	10	5	4	5	0	1	0	46	0.010548	Large (20 < X <= 100)
clonotype 121	TRAV26-1.TRAJ31.TRAC;TRAV29/DV5.TRAJ47.TRAC	TRBV19.TRBD1.TRBJ2-2.TRBC2	CIVGRNNARLMF;CAATIPYGNKLVF	CASIQDRAAGELFF	TGCATCGTCGGCAGAAACAATGCCAGACTCATGTTT;TGTGCAGCAACCATTCCTTATGGAAACAAGCTGGTCTTT	TGTGCCAGTATCCAGGACAGGGCGGCCGGGGAGCTGTTTTTT	0	0	11	11	7	8	7	0	0	0	44	0.0100894	Large (20 < X <= 100)
clonotype 114	TRAV25.TRAJ30.TRAC;TRAV38-1.TRAJ24.TRAC	TRBV5-8.NA.TRBJ1-6.TRBC1	CAGPRDDKIIF;CAFMKHPTDSWGKFQF	CASSRRTGANSPLHF	TGTGCAGGGCCACGGGATGACAAGATCATCTTT;TGTGCTTTCATGAAGCATCCCACTGACAGCTGGGGGAAATTCCAGTTT	TGTGCCAGCAGCCGAAGGACAGGAGCTAATTCACCCCTCCACTTT	1	0	3	0	5	6	3	0	2	0	20	0.0045861	Medium (5 < X <= 20)
clonotype 175	TRAV4.TRAJ11.TRAC	TRBV5-4.NA.TRBJ1-2.TRBC1	CLVEGYSTLTF	CASSLRDSFNYGYTF	TGCCTCGTGGAGGGATACAGCACCCTCACCTTT	TGTGCCAGCAGCTTGCGGGACAGCTTTAACTATGGCTACACCTTC	1	0	0	1	8	3	4	0	2	0	19	0.0043568	Medium (5 < X <= 20)
clonotype 206	TRAV8-6.TRAJ17.TRAC;TRAV8-3.TRAJ27.TRAC	TRBV5-8.NA.TRBJ2-5.TRBC2	CAVPKAAGNKLTF;CAVGSTNAGKSTF	CASSSRAGRLETQYF	TGTGCTGTACCCAAAGCTGCAGGCAACAAGCTAACTTTT;TGTGCTGTGGGCAGCACCAATGCAGGCAAATCAACCTTT	TGTGCCAGCAGCTCCCGGGCAGGGCGGTTGGAGACCCAGTACTTC	0	0	5	0	2	5	2	0	1	0	15	0.00343958	Medium (5 < X <= 20)
clonotype 2	NA	TRBV11-2.TRBD2.TRBJ2-1.TRBC2	NA	CASSSGLAGGNEQFF	NA	TGTGCCAGCAGCTCGGGACTAGCGGGGGGGAATGAGCAGTTCTTC	4	0	2	5	0	0	1	0	0	0	12	0.00275166	Medium (5 < X <= 20)
clonotype 122	TRAV26-1.TRAJ31.TRAC	TRBV19.TRBD1.TRBJ2-2.TRBC2	CIVGRNNARLMF	CASIQDRAAGELFF	TGCATCGTCGGCAGAAACAATGCCAGACTCATGTTT	TGTGCCAGTATCCAGGACAGGGCGGCCGGGGAGCTGTTTTTT	0	0	0	3	4	2	2	0	0	0	11	0.00252236	Medium (5 < X <= 20)
clonotype 4	NA	TRBV2.NA.TRBJ2-1.TRBC2	NA	CASSEELAGVGEQFF	NA	TGTGCCAGCAGTGAAGAGCTAGCGGGAGTTGGTGAGCAGTTCTTC	0	0	1	0	0	6	1	0	0	0	8	0.00183444	Medium (5 < X <= 20)
clonotype 30	TRAV12-1.TRAJ44.TRAC	TRBV12-4.TRBD1.TRBJ2-2.TRBC2	CVVIGGKLTF	CASSGNQGGLGELFF	TGTGTGGTGATTGGGGGTAAACTCACCTTT	TGTGCCAGCAGCGGAAACCAAGGGGGGCTGGGGGAGCTGTTTTTT	0	0	2	1	3	1	1	0	0	0	8	0.00183444	Medium (5 < X <= 20)
clonotype 133	TRAV26-1.TRAJ52.TRAC;TRAV17.TRAJ52.TRAC	TRBV27.NA.TRBJ2-7.TRBC2	CIVRAAGGTSYGKLTF;CATDHYYNAGGTSYGKLTF	CASSSLGLEQYF	TGCATCGTCAGAGCCGCTGGTGGTACTAGCTATGGAAAGCTGACATTT;TGTGCTACGGATCACTATTATAATGCTGGTGGTACTAGCTATGGAAAGCTGACATTT	TGTGCCAGCAGTTCCTTAGGGCTTGAGCAGTACTTC	0	0	2	1	2	0	1	0	2	0	8	0.00183444	Medium (5 < X <= 20)
clonotype 199	TRAV8-4.TRAJ3.TRAC	TRBV11-3.NA.TRBJ1-1.TRBC1	CAVSPGTGYSSASKIIF	CASSSEIEGMNTEAFF	TGTGCTGTGAGTCCCGGCACGGGGTACAGCAGTGCTTCCAAGATAATCTTT	TGTGCCAGCAGCTCAGAAATCGAGGGAATGAACACTGAAGCTTTCTTT	0	0	0	0	0	1	0	7	0	0	8	0.00183444	Medium (5 < X <= 20)
clonotype 214	TRAV9-2.TRAJ28.TRAC;TRAV9-2.TRAJ16.TRAC	TRBV6-1.NA.TRBJ2-7.TRBC2	CALTPYSGAGSYQLTF;CALSDPPPFSDGQKLLF	CASKYSTGTSFSYEQYF	TGTGCTCTGACCCCATACTCTGGGGCTGGGAGTTACCAACTCACTTTC;TGTGCTCTGAGTGATCCCCCACCTTTTTCAGATGGCCAGAAGCTGCTCTTT	TGTGCCAGCAAATATTCTACCGGGACTAGCTTCTCCTACGAGCAGTACTTC	0	0	0	3	2	2	1	0	0	0	8	0.00183444	Medium (5 < X <= 20)
clonotype 226	TRAV9-2.TRAJ53.TRAC	TRBV30.TRBD1.TRBJ2-7.TRBC2	CAPGGSNYKLTF	CAWSGQGPYEQYF	TGTGCTCCTGGAGGTAGCAACTATAAACTGACATTT	TGTGCCTGGAGTGGACAGGGTCCCTACGAGCAGTACTTC	0	0	1	0	4	1	0	0	1	0	7	0.00160514	Medium (5 < X <= 20)
clonotype 228	TRAV9-2.TRAJ8.TRAC	TRBV2.NA.TRBJ2-1.TRBC2;TRBV2.NA.TRBJ2-3.TRBC2	CALLNTGFQKLVF	CASSEELAGVGEQFF;CASRGEYPDTQYF	TGTGCTCTGTTGAACACAGGCTTTCAGAAACTTGTATTT	TGTGCCAGCAGTGAAGAGCTAGCGGGAGTTGGTGAGCAGTTCTTC;TGTGCCAGCCGGGGGGAGTACCCAGATACGCAGTATTTT	0	0	0	0	0	0	0	7	0	0	7	0.00160514	Medium (5 < X <= 20)
clonotype 36	TRAV12-2.TRAJ21.TRAC;TRAV9-2.TRAJ35.TRAC	TRBV6-1.NA.TRBJ1-3.TRBC1	CAVNFNKFYF;CARRRGFGNVLHC	CASSEGPFSGNTIYF	TGTGCCGTGAACTTCAACAAATTTTACTTT;TGTGCTCGAAGGCGAGGCTTTGGGAATGTGCTGCATTGC	TGTGCCAGCAGTGAAGGCCCCTTCTCTGGAAACACCATATATTTT	0	0	0	0	0	0	1	5	0	0	6	0.00137583	Medium (5 < X <= 20)
clonotype 49	TRAV12-3.TRAJ54.TRAC	TRBV2.NA.TRBJ2-1.TRBC2;TRBV2.NA.TRBJ1-5.TRBC1	CATPTGAQKLVF	CASSEELAGVGEQFF;CASSEDRVNQPQHF	TGTGCAACCCCTACGGGAGCCCAGAAGCTGGTATTT	TGTGCCAGCAGTGAAGAGCTAGCGGGAGTTGGTGAGCAGTTCTTC;TGTGCCAGCAGTGAGGACAGGGTCAATCAGCCCCAGCATTTT	0	0	0	0	2	3	1	0	0	0	6	0.00137583	Medium (5 < X <= 20)
clonotype 63	TRAV13-2.TRAJ40.TRAC	TRBV12-4.NA.TRBJ1-2.TRBC1	CAERWDSGTYKYIF	CASSQGPYGYTF	TGTGCAGAGAGATGGGACTCAGGAACCTACAAATACATCTTT	TGTGCCAGCAGCCAGGGACCTTATGGCTACACCTTC	0	0	0	0	0	0	0	6	0	0	6	0.00137583	Medium (5 < X <= 20)
clonotype 80	TRAV17.TRAJ58.TRAC	TRBV5-4.NA.TRBJ2-3.TRBC2	CATGKETSGSRLTF	CASSKGNADTQYF	TGTGCTACGGGGAAAGAAACCAGTGGCTCTAGGTTGACCTTT	TGTGCCAGCAGCAAGGGAAATGCAGATACGCAGTATTTT	0	0	0	0	0	1	0	5	0	0	6	0.00137583	Medium (5 < X <= 20)
clonotype 103	TRAV21.TRAJ56.TRAC	TRBV5-1.TRBD1.TRBJ2-7.TRBC2	CAVTWAGANSKLTF	CASSRTGEYEQYF	TGTGCTGTGACATGGGCTGGAGCCAATAGTAAGCTGACATTT	TGCGCCAGCAGTAGGACAGGGGAGTACGAGCAGTACTTC	1	0	2	2	0	1	0	0	0	0	6	0.00137583	Medium (5 < X <= 20)
clonotype 146	TRAV29/DV5.TRAJ43.TRAC	TRBV12-3.NA.TRBJ1-2.TRBC1	CAASDNNNDMRF	CASSLADSLGGYTF	TGTGCAGCAAGCGACAATAACAATGACATGCGCTTT	TGTGCCAGCAGTTTAGCGGACAGCCTGGGTGGCTACACCTTC	0	0	0	0	0	0	0	6	0	0	6	0.00137583	Medium (5 < X <= 20)
clonotype 155	TRAV35.TRAJ20.TRAC	TRBV7-9.NA.TRBJ2-3.TRBC2	CAAHNDYKLSF	CASSLGAGTLSTDTQYF	TGTGCTGCCCATAACGACTACAAGCTCAGCTTT	TGTGCCAGCAGCTTAGGGGCCGGGACACTTAGCACAGATACGCAGTATTTT	0	0	3	2	0	1	0	0	0	0	6	0.00137583	Medium (5 < X <= 20)
clonotype 179	TRAV4.TRAJ39.TRAC	TRBV7-9.NA.TRBJ2-5.TRBC2	CLVGDITNAGNMLTF	CASSLGWGGGQETQYF	TGCCTCGTGGGTGACATCACTAATGCAGGCAACATGCTCACCTTT	TGTGCCAGCAGCTTAGGGTGGGGGGGTGGACAAGAGACCCAGTACTTC	0	0	0	2	1	2	1	0	0	0	6	0.00137583	Medium (5 < X <= 20)
clonotype 182	TRAV5.TRAJ36.TRAC	TRBV2.NA.TRBJ2-1.TRBC2;TRBV2.TRBD1.TRBJ1-1.TRBC1	CAEIQTGANNLFF	CASSEELAGVGEQFF;CASSERGHLNTEAFF	TGTGCAGAGATTCAAACTGGGGCAAACAACCTCTTCTTT	TGTGCCAGCAGTGAAGAGCTAGCGGGAGTTGGTGAGCAGTTCTTC;TGTGCCAGCAGTGAGAGGGGGCACTTGAACACTGAAGCTTTCTTT	0	0	0	0	0	0	1	5	0	0	6	0.00137583	Medium (5 < X <= 20)
clonotype 187	TRAV6.TRAJ9.TRAC	TRBV24-1.NA.TRBJ2-3.TRBC2	CALITGGFKTIF	CATSDPSGVGTDTQYF	TGTGCTCTAATTACTGGAGGCTTCAAAACTATCTTT	TGTGCCACCAGTGATCCAAGCGGGGTGGGCACAGATACGCAGTATTTT	0	0	0	0	0	0	1	5	0	0	6	0.00137583	Medium (5 < X <= 20)
clonotype 16	TRAV12-1.TRAJ16.TRAC	TRBV12-4.NA.TRBJ1-1.TRBC1	CVVTHGQKLLF	CASSPHGGGITEAFF	TGTGTGGTGACCCATGGCCAGAAGCTGCTCTTT	TGTGCCAGCAGTCCCCATGGGGGCGGGATCACTGAAGCTTTCTTT	0	0	1	1	2	1	0	0	0	0	5	0.00114653	Small (1 < X <= 5)
clonotype 52	TRAV13-1.TRAJ41.TRAC	TRBV28.NA.TRBJ2-3.TRBC2	CAASSGYALNF	CASSPHDTQYF	TGTGCAGCATCTTCCGGGTATGCACTCAACTTC	TGTGCCAGCAGCCCTCACGATACGCAGTATTTT	0	0	0	3	1	1	0	0	0	0	5	0.00114653	Small (1 < X <= 5)
clonotype 55	TRAV13-1.TRAJ49.TRAC;TRAV41.TRAJ49.TRAC	TRBV6-6.NA.TRBJ1-5.TRBC1	CAASTTGNQFYF;CAFTGNQFYF	CASSYGRAGNQPQHF	TGTGCAGCAAGTACTACCGGTAACCAGTTCTATTTT;TGTGCCTTCACCGGTAACCAGTTCTATTTT	TGTGCCAGCAGTTACGGGCGTGCGGGCAATCAGCCCCAGCATTTT	0	0	1	0	0	1	0	2	1	0	5	0.00114653	Small (1 < X <= 5)
clonotype 86	TRAV2.TRAJ17.TRAC	TRBV2.NA.TRBJ2-1.TRBC2;TRBV2.NA.TRBJ2-1.TRBC2	CAVEKAAGNKLTF	CASSEELAGVGEQFF;CASSEGNPYNEQFF	TGTGCTGTGGAGAAAGCTGCAGGCAACAAGCTAACTTTT	TGTGCCAGCAGTGAAGAGCTAGCGGGAGTTGGTGAGCAGTTCTTC;TGTGCCAGCAGTGAGGGGAACCCCTACAATGAGCAGTTCTTC	0	0	1	0	1	3	0	0	0	0	5	0.00114653	Small (1 < X <= 5)
clonotype 212	TRAV9-2.TRAJ18.TRAC	TRBV5-1.NA.TRBJ2-3.TRBC2	CALSARGSTLGRLYF	CASSLGQGGTDTQYF	TGTGCTCTGAGTGCGAGAGGCTCAACCCTGGGGAGGCTATACTTT	TGCGCCAGCAGCTTAGGTCAGGGAGGGACAGATACGCAGTATTTT	0	0	0	0	0	0	0	5	0	0	5	0.00114653	Small (1 < X <= 5)
clonotype 26	TRAV12-1.TRAJ40.TRAC	TRBV11-2.NA.TRBJ2-3.TRBC2	CVVNIPSGTYKYIF	CASSLLVSATSTDTQYF	TGTGTGGTGAACATCCCATCAGGAACCTACAAATACATCTTT	TGTGCCAGCAGCCTACTGGTGAGCGCCACTAGCACAGATACGCAGTATTTT	0	0	0	0	0	0	0	4	0	0	4	0.000917221	Small (1 < X <= 5)
clonotype 37	TRAV12-2.TRAJ21.TRAC	TRBV19.TRBD1.TRBJ1-2.TRBC1	CAVNFNKFYF	CASSINRAGGYGYTF	TGTGCCGTGAACTTCAACAAATTTTACTTT	TGTGCCAGTAGTATAAATAGGGCAGGGGGCTATGGCTACACCTTC	0	0	0	0	0	0	0	4	0	0	4	0.000917221	Small (1 < X <= 5)
clonotype 38	TRAV12-2.TRAJ22.TRAC	TRBV20-1.NA.TRBJ1-5.TRBC1	CAVVGPARQLTF	CSARQLYDQPQHF	TGTGCCGTGGTGGGCCCTGCAAGGCAACTGACCTTT	TGCAGTGCTCGACAGTTGTACGATCAGCCCCAGCATTTT	0	0	0	0	0	1	0	3	0	0	4	0.000917221	Small (1 < X <= 5)
clonotype 41	TRAV12-2.TRAJ29.TRAC	TRBV24-1.NA.TRBJ1-6.TRBC1	CAANSGNTPLVF	CATSQEGGSPLHF	TGTGCCGCAAATTCAGGAAACACACCTCTTGTCTTT	TGTGCCACCAGTCAAGAAGGTGGTTCACCCCTCCACTTT	0	0	0	0	0	0	0	4	0	0	4	0.000917221	Small (1 < X <= 5)
clonotype 42	TRAV12-2.TRAJ37.TRAC	TRBV5-1.NA.TRBJ2-1.TRBC2	CAVNFRGSSNTGKLIF	CASSRLRGQNNEQFF	TGTGCCGTGAACTTTAGGGGGTCTAGCAACACAGGCAAACTAATCTTT	TGCGCCAGCAGCCGCCTCCGGGGACAGAACAATGAGCAGTTCTTC	0	0	2	0	0	2	0	0	0	0	4	0.000917221	Small (1 < X <= 5)
clonotype 54	TRAV13-1.TRAJ47.TRAC	TRBV3-1.NA.TRBJ2-7.TRBC2	CAARINGNKLVF	CASSQSGGRYEQYF	TGTGCAGCAAGGATAAATGGAAACAAGCTGGTCTTT	TGTGCCAGCAGCCAATCAGGGGGTCGGTACGAGCAGTACTTC	0	0	0	0	0	0	0	4	0	0	4	0.000917221	Small (1 < X <= 5)
clonotype 62	TRAV13-2.TRAJ38.TRAC;TRAV8-1.TRAJ8.TRAC	TRBV20-1.NA.TRBJ2-5.TRBC2	CAETPDAGNNRKLIW;CAVNARATGFQKLVF	CSAGSPVGAGQETQYF	TGTGCAGAGACCCCTGATGCTGGCAACAACCGTAAGCTGATTTGG;TGTGCCGTGAATGCTCGAGCTACAGGCTTTCAGAAACTTGTATTT	TGCAGTGCTGGCTCCCCAGTCGGGGCCGGCCAAGAGACCCAGTACTTC	0	0	0	0	1	0	0	0	0	3	4	0.000917221	Small (1 < X <= 5)
clonotype 64	TRAV13-2.TRAJ40.TRAC	TRBV7-9.NA.TRBJ2-7.TRBC2	CAEGSAGTYKYIF	CASIQTGSSYEQYF	TGTGCAGAGGGATCGGCAGGAACCTACAAATACATCTTT	TGTGCCAGCATTCAAACGGGGTCCTCCTACGAGCAGTACTTC	0	0	1	2	0	1	0	0	0	0	4	0.000917221	Small (1 < X <= 5)
clonotype 71	TRAV14/DV4.TRAJ49.TRAC	TRBV28.NA.TRBJ2-4.TRBC2	CAMRDPTGNQFYF	CASSLTVLAKNIQYF	TGTGCAATGAGAGATCCTACCGGTAACCAGTTCTATTTT	TGTGCCAGCAGTTTAACAGTATTAGCCAAAAACATTCAGTACTTC	0	0	0	1	1	0	0	2	0	0	4	0.000917221	Small (1 < X <= 5)
clonotype 77	TRAV17.TRAJ48.TRAC	TRBV20-1.NA.TRBJ1-1.TRBC1	CATDAGGNEKLTF	CSARVPPPPDTEAFF	TGTGCTACGGACGCGGGGGGAAATGAGAAATTAACCTTT	TGCAGTGCTAGAGTCCCGCCTCCACCAGACACTGAAGCTTTCTTT	0	0	0	0	0	0	0	4	0	0	4	0.000917221	Small (1 < X <= 5)
clonotype 84	TRAV19.TRAJ49.TRAC	TRBV19.TRBD1.TRBJ2-3.TRBC2	CALSGRRTGNQFYF	CASSIGTGFSDTQYF	TGTGCTCTGAGTGGGCGGCGCACCGGTAACCAGTTCTATTTT	TGTGCCAGTAGTATCGGGACAGGGTTTTCAGATACGCAGTATTTT	0	0	0	0	0	1	0	3	0	0	4	0.000917221	Small (1 < X <= 5)
clonotype 101	TRAV21.TRAJ52.TRAC	NA	CAVRFGGGTSYGKLTF	NA	TGTGCTGTGAGATTTGGTGGTGGTACTAGCTATGGAAAGCTGACATTT	NA	0	0	1	1	0	1	1	0	0	0	4	0.000917221	Small (1 < X <= 5)
clonotype 112	TRAV24.TRAJ58.TRAC	TRBV7-9.NA.TRBJ2-5.TRBC2	CAQTSGSRLTF	CASSSGYSAETQYF	TGTGCCCAAACCAGTGGCTCTAGGTTGACCTTT	TGTGCCAGCAGCTCCGGGTACTCAGCAGAGACCCAGTACTTC	0	0	0	0	0	1	0	3	0	0	4	0.000917221	Small (1 < X <= 5)
clonotype 115	TRAV25.TRAJ49.TRAC	TRBV28.NA.TRBJ1-1.TRBC1	CAGRGNQFYF	CASSYPDSYTEAFF	TGTGCAGGGAGGGGTAACCAGTTCTATTTT	TGTGCCAGCAGTTACCCAGACAGTTACACTGAAGCTTTCTTT	0	0	1	0	0	3	0	0	0	0	4	0.000917221	Small (1 < X <= 5)
clonotype 134	TRAV26-1.TRAJ54.TRAC	TRBV24-1.NA.TRBJ2-7.TRBC2;TRBV25-1.NA.TRBJ2-1.TRBC2	CIVRVWGAQKLVF	CATSDLKIWGHSYEQYV;CASSEYKAEYSYNEQFF	TGCATCGTCAGAGTCTGGGGAGCCCAGAAGCTGGTATTT	TGTGCCACCAGTGATTTGAAAATCTGGGGTCATTCCTACGAGCAGTACGTC;TGTGCCAGCAGTGAATATAAGGCGGAATACTCCTACAATGAGCAGTTCTTC	0	0	0	0	0	1	0	3	0	0	4	0.000917221	Small (1 < X <= 5)
clonotype 156	TRAV35.TRAJ26.TRAC	TRBV6-5.NA.TRBJ1-1.TRBC1	CAGDPRDNYGQNFVF	CASLGGARGTEAFF	TGTGCTGGTGACCCCCGGGATAACTATGGTCAGAATTTTGTCTTT	TGTGCCAGCCTAGGAGGGGCGCGCGGTACTGAAGCTTTCTTT	0	0	1	1	0	1	1	0	0	0	4	0.000917221	Small (1 < X <= 5)
clonotype 177	TRAV4.TRAJ28.TRAC;TRAV8-2.TRAJ13.TRAC	TRBV5-4.NA.TRBJ2-1.TRBC2	CLVGAAGAGSYQLTF;CVVRPNSGGYQKVTF	CASSSRDYSSYNEQFF	TGCCTCGTGGGTGCTGCGGGGGCTGGGAGTTACCAACTCACTTTC;TGTGTTGTGAGGCCTAATTCTGGGGGTTACCAGAAAGTTACCTTT	TGTGCCAGCAGCTCACGAGACTACAGCTCCTACAATGAGCAGTTCTTC	0	0	0	1	0	2	1	0	0	0	4	0.000917221	Small (1 < X <= 5)
clonotype 183	TRAV5.TRAJ36.TRAC	TRBV2.TRBD1.TRBJ1-1.TRBC1	CAEIQTGANNLFF	CASSERGHLNTEAFF	TGTGCAGAGATTCAAACTGGGGCAAACAACCTCTTCTTT	TGTGCCAGCAGTGAGAGGGGGCACTTGAACACTGAAGCTTTCTTT	0	0	0	0	0	0	0	4	0	0	4	0.000917221	Small (1 < X <= 5)
clonotype 189	TRAV8-1.TRAJ20.TRAC	TRBV25-1.NA.TRBJ1-6.TRBC1	CAVKGDDYKLSF	CASSTGPNNSPLHF	TGTGCCGTGAAGGGAGACGACTACAAGCTCAGCTTT	TGTGCCAGCAGCACAGGGCCGAATAATTCACCCCTCCACTTT	0	0	0	2	0	1	1	0	0	0	4	0.000917221	Small (1 < X <= 5)
clonotype 213	TRAV9-2.TRAJ21.TRAC	TRBV10-3.TRBD2.TRBJ2-3.TRBC2	CALRNNFNKFYF	CAISEATSGRLDTQYF	TGTGCTCTGAGGAACAACTTCAACAAATTTTACTTT	TGTGCCATCAGTGAGGCGACTAGCGGGAGATTGGATACGCAGTATTTT	0	0	0	0	0	1	0	3	0	0	4	0.000917221	Small (1 < X <= 5)
clonotype 223	TRAV9-2.TRAJ48.TRAC;TRAV38-2/DV8.TRAJ31.TRAC	TRBV5-8.NA.TRBJ2-7.TRBC2	CALSDQDFGNEKLTF;CAYRSARNNNARLMF	CASSYPPGLAKSSYEQYF	TGTGCTCTGAGTGATCAAGACTTTGGAAATGAGAAATTAACCTTT;TGTGCTTATAGGAGCGCGCGGAATAACAATGCCAGACTCATGTTT	TGTGCCAGCAGCTATCCCCCGGGACTAGCGAAAAGCTCCTACGAGCAGTACTTC	0	0	0	0	0	0	0	4	0	0	4	0.000917221	Small (1 < X <= 5)
clonotype 9	NA	TRBV5-1.NA.TRBJ2-5.TRBC2	NA	CASSFGRVRQETQYF	NA	TGCGCCAGCAGCTTCGGGAGGGTGCGCCAAGAGACCCAGTACTTC	0	0	0	0	0	0	0	3	0	0	3	0.000687916	Small (1 < X <= 5)
clonotype 14	TRAV1-1.TRAJ13.TRAC	TRBV7-6.NA.TRBJ2-1.TRBC2	CAGGYQKVTF	CASSTRTLHEQFF	TGCGCTGGGGGTTACCAGAAAGTTACCTTT	TGTGCCAGCAGCACCCGGACACTCCATGAGCAGTTCTTC	0	0	0	0	0	0	0	3	0	0	3	0.000687916	Small (1 < X <= 5)
clonotype 21	TRAV12-1.TRAJ28.TRAC	TRBV5-1.NA.TRBJ1-2.TRBC1;TRBV12-4.NA.TRBJ2-7.TRBC2	CVVNPLGAGSYQLTF	CASSPDSNYGYTF;CASSLERYEQYV	TGTGTGGTGAACCCCCTCGGGGCTGGGAGTTACCAACTCACTTTC	TGCGCCAGCAGCCCGGACAGTAACTATGGCTACACCTTC;TGTGCCAGCAGTTTAGAGAGGTACGAGCAGTACGTC	0	0	0	0	0	0	0	3	0	0	3	0.000687916	Small (1 < X <= 5)
clonotype 22	TRAV12-1.TRAJ30.TRAC	TRBV12-4.NA.TRBJ2-1.TRBC2	CVVNLRDDKIIF	CASSLQRTGLGEQFF	TGTGTGGTGAACCTTCGAGATGACAAGATCATCTTT	TGTGCCAGCAGTTTGCAGAGGACCGGGTTAGGGGAGCAGTTCTTC	0	0	2	0	0	1	0	0	0	0	3	0.000687916	Small (1 < X <= 5)
clonotype 28	TRAV12-1.TRAJ44.TRAC	TRBV12-4.TRBD1.TRBJ2-2.TRBC2;TRBV12-4.NA.TRBJ2-7.TRBC2	CVVIGGKLTF	CASSGNQGGLGELFF;CASSFAQGTYEQYF	TGTGTGGTGATTGGGGGTAAACTCACCTTT	TGTGCCAGCAGCGGAAACCAAGGGGGGCTGGGGGAGCTGTTTTTT;TGTGCCAGCAGTTTCGCGCAGGGGACCTACGAGCAGTACTTC	0	0	0	0	1	0	2	0	0	0	3	0.000687916	Small (1 < X <= 5)
clonotype 29	TRAV12-1.TRAJ44.TRAC	TRBV12-4.TRBD1.TRBJ2-2.TRBC2;TRBV12-4.TRBD1.TRBJ2-7.TRBC2	CVVIGGKLTF	CASSGNQGGLGELFF;CASSLNDRGLDEQYF	TGTGTGGTGATTGGGGGTAAACTCACCTTT	TGTGCCAGCAGCGGAAACCAAGGGGGGCTGGGGGAGCTGTTTTTT;TGTGCCAGCAGTTTAAATGACAGGGGGCTGGACGAGCAGTACTTC	0	0	0	1	0	0	1	0	1	0	3	0.000687916	Small (1 < X <= 5)
clonotype 34	TRAV12-1.TRAJ8.TRAC	TRBV5-6.NA.TRBJ2-7.TRBC2	CVVNRGNTGFQKLVF	CASSLVRGLSYEQYF	TGTGTGGTGAACCGGGGGAACACAGGCTTTCAGAAACTTGTATTT	TGTGCCAGCAGCTTGGTTCGGGGCCTATCCTACGAGCAGTACTTC	0	0	0	0	0	0	0	3	0	0	3	0.000687916	Small (1 < X <= 5)
clonotype 44	TRAV12-2.TRAJ48.TRAC	TRBV5-1.NA.TRBJ2-3.TRBC2	CAVLLSNFGNEKLTF	CASSRGTTDTQYF	TGTGCCGTTCTTCTATCTAACTTTGGAAATGAGAAATTAACCTTT	TGCGCCAGCAGCAGGGGGACCACAGATACGCAGTATTTT	0	0	0	0	0	0	0	3	0	0	3	0.000687916	Small (1 < X <= 5)
clonotype 45	TRAV12-2.TRAJ49.TRAC	TRBV5-1.NA.TRBJ1-2.TRBC1	CAVRWNQFYF	CASSLRGEFGYTF	TGTGCCGTGAGGTGGAACCAGTTCTATTTT	TGCGCCAGCAGCTTAAGGGGCGAATTCGGCTACACCTTC	0	0	0	0	0	0	0	3	0	0	3	0.000687916	Small (1 < X <= 5)
clonotype 48	TRAV12-3.TRAJ40.TRAC	TRBV18.NA.TRBJ2-7.TRBC2	CAMSANPRAYKYIF	CASSPGDNYEQYF	TGTGCAATGAGCGCGAATCCCCGGGCCTACAAATACATCTTT	TGTGCCAGCTCACCCGGGGACAACTACGAGCAGTACTTC	0	0	0	0	0	0	1	2	0	0	3	0.000687916	Small (1 < X <= 5)
clonotype 51	TRAV13-1.TRAJ41.TRAC	TRBV20-1.NA.TRBJ2-1.TRBC2	CAASRNSGYALNF	CSARGPAGHYNEQFF	TGTGCAGCAAGTAGAAATTCCGGGTATGCACTCAACTTC	TGCAGTGCTAGGGGCCCTGCGGGCCATTACAATGAGCAGTTCTTC	0	0	0	0	0	0	1	2	0	0	3	0.000687916	Small (1 < X <= 5)
clonotype 53	TRAV13-1.TRAJ43.TRAC	TRBV12-4.NA.TRBJ2-1.TRBC2;TRBV12-4.NA.TRBJ2-7.TRBC2	CAASVNDMRF	CASSPHLQGLGEQFF;CASSFAQGTYEQYF	TGTGCAGCAAGTGTAAATGACATGCGCTTT	TGTGCCAGCAGCCCCCACTTACAGGGTCTAGGTGAGCAGTTCTTC;TGTGCCAGCAGTTTCGCGCAGGGGACCTACGAGCAGTACTTC	0	0	0	0	1	0	0	0	2	0	3	0.000687916	Small (1 < X <= 5)
clonotype 61	TRAV13-2.TRAJ29.TRAC	TRBV12-4.TRBD1.TRBJ1-4.TRBC1	CAEKTSGNTPLVF	CASRRQGTGEKLFF	TGTGCAGAGAAGACCTCAGGAAACACACCTCTTGTCTTT	TGTGCCAGCAGAAGACAGGGGACGGGCGAAAAACTGTTTTTT	0	0	0	0	0	0	0	3	0	0	3	0.000687916	Small (1 < X <= 5)
clonotype 65	TRAV13-2.TRAJ40.TRAC	TRBV5-1.NA.TRBJ1-1.TRBC1	CAEGPTSGTYKYIF	CASSYLSGYSEAFF	TGTGCAGAGGGGCCGACCTCAGGAACCTACAAATACATCTTT	TGCGCCAGCAGCTACCTCAGTGGGTATTCCGAAGCTTTCTTT	0	0	1	0	0	1	1	0	0	0	3	0.000687916	Small (1 < X <= 5)
clonotype 67	TRAV14/DV4.TRAJ15.TRAC;TRAV12-2.TRAJ49.TRAC	TRBV6-1.NA.TRBJ1-1.TRBC1	CAMPSGQAGTALIF;CAVKYNQFYF	CASTRGDGTEAFF	TGTGCAATGCCAAGCGGCCAGGCAGGAACTGCTCTGATCTTT;TGTGCCGTGAAATATAACCAGTTCTATTTT	TGTGCCAGCACGAGGGGGGACGGCACTGAAGCTTTCTTT	0	0	0	0	0	0	0	3	0	0	3	0.000687916	Small (1 < X <= 5)
clonotype 69	TRAV14/DV4.TRAJ40.TRAC	TRBV7-2.TRBD2.TRBJ2-1.TRBC2	CAMREGLGSGTYKYIF	CASSLGRLAGGDNEQFF	TGTGCAATGAGAGAGGGCCTGGGCTCAGGAACCTACAAATACATCTTT	TGTGCCAGCAGCTTAGGCCGACTAGCGGGGGGGGACAATGAGCAGTTCTTC	0	0	1	1	0	1	0	0	0	0	3	0.000687916	Small (1 < X <= 5)
clonotype 73	TRAV14/DV4.TRAJ58.TRAC	TRBV5-4.NA.TRBJ1-2.TRBC1	CAMRGRETSGSRLTF	CASSSGGVLDYGYTF	TGTGCAATGAGAGGTAGGGAAACCAGTGGCTCTAGGTTGACCTTT	TGTGCCAGCAGCTCGGGGGGGGTTCTGGACTATGGCTACACCTTC	0	0	0	0	0	0	0	3	0	0	3	0.000687916	Small (1 < X <= 5)
clonotype 74	TRAV14/DV4.TRAJ7.TRAC;TRAV21.TRAJ24.TRAC	TRBV12-3.NA.TRBJ1-4.TRBC1	CAMREADYGNNRLAF;CAVPDSWGKFQF	CASTSFATNEKLFF	TGTGCAATGAGAGAGGCCGACTATGGGAACAACAGACTCGCTTTT;TGTGCTGTGCCCGACAGCTGGGGGAAATTCCAGTTT	TGTGCCAGCACCTCATTTGCAACTAATGAAAAACTGTTTTTT	0	0	0	0	0	0	0	3	0	0	3	0.000687916	Small (1 < X <= 5)
clonotype 75	TRAV17.TRAJ10.TRAC	TRBV5-1.NA.TRBJ1-5.TRBC1	CAGWGLTGGGNKLTF	CASSLEGSNQPQHF	TGTGCCGGGTGGGGACTCACGGGAGGAGGAAACAAACTCACCTTT	TGCGCCAGCAGCTTGGAGGGGAGCAATCAGCCCCAGCATTTT	0	0	0	0	0	0	0	3	0	0	3	0.000687916	Small (1 < X <= 5)
clonotype 78	TRAV17.TRAJ56.TRAC	TRBV5-1.NA.TRBJ1-2.TRBC1	CATDAVTGANSKLTF	CASSPGLWGFYGYTF	TGTGCTACGGACGCTGTGACCGGAGCCAATAGTAAGCTGACATTT	TGCGCCAGCAGCCCGGGACTATGGGGATTCTATGGCTACACCTTC	0	0	0	0	0	0	0	3	0	0	3	0.000687916	Small (1 < X <= 5)
clonotype 83	TRAV19.TRAJ43.TRAC	TRBV10-3.NA.TRBJ2-3.TRBC2	CAYNNNDMRF	CAISADKGITSTDTQYF	TGTGCTTACAATAACAATGACATGCGCTTT	TGTGCCATCAGTGCCGACAAGGGAATTACTAGCACAGATACGCAGTATTTT	0	0	1	0	2	0	0	0	0	0	3	0.000687916	Small (1 < X <= 5)
clonotype 85	TRAV19.TRAJ56.TRAC	TRBV12-4.NA.TRBJ2-7.TRBC2	CALSEARKTGANSKLTF	CASSFSRTSQQYF	TGTGCTCTGAGTGAGGCGAGGAAAACTGGAGCCAATAGTAAGCTGACATTT	TGTGCCAGCAGTTTCTCTCGGACTAGTCAGCAGTACTTC	0	0	1	0	1	1	0	0	0	0	3	0.000687916	Small (1 < X <= 5)
clonotype 87	TRAV2.TRAJ17.TRAC	TRBV2.NA.TRBJ2-1.TRBC2	CAVEKAAGNKLTF	CASSEGNPYNEQFF	TGTGCTGTGGAGAAAGCTGCAGGCAACAAGCTAACTTTT	TGTGCCAGCAGTGAGGGGAACCCCTACAATGAGCAGTTCTTC	0	0	1	0	1	1	0	0	0	0	3	0.000687916	Small (1 < X <= 5)
clonotype 94	TRAV20.TRAJ52.TRAC	TRBV20-1.NA.TRBJ1-5.TRBC1	CAVNAGGTSYGKLTF	CSARVVMGQPQHF	TGTGCTGTTAATGCTGGTGGTACTAGCTATGGAAAGCTGACATTT	TGCAGTGCTAGAGTTGTGATGGGTCAGCCCCAGCATTTT	0	0	2	0	0	1	0	0	0	0	3	0.000687916	Small (1 < X <= 5)
clonotype 100	TRAV21.TRAJ42.TRAC	TRBV5-1.NA.TRBJ2-3.TRBC2	CAGAYGGSQGNLIF	CASSRLAGGRTDTQYF	TGTGCTGGGGCTTATGGAGGAAGCCAAGGAAATCTCATCTTT	TGCGCCAGCAGCCGATTAGCGGGAGGCCGCACAGATACGCAGTATTTT	0	0	2	0	0	0	1	0	0	0	3	0.000687916	Small (1 < X <= 5)
clonotype 129	TRAV26-1.TRAJ42.TRAC	TRBV20-1.NA.TRBJ1-2.TRBC1	CIVRVEGSQGNLIF	CSARETGIQRYTF	TGCATCGTCAGAGTCGAAGGAAGCCAAGGAAATCTCATCTTT	TGCAGTGCTAGAGAAACAGGGATCCAACGCTACACCTTC	0	0	0	0	0	0	1	2	0	0	3	0.000687916	Small (1 < X <= 5)
clonotype 135	TRAV26-1.TRAJ54.TRAC	TRBV30.NA.TRBJ1-2.TRBC1	CIVSRGRVQGAQKLVF	CAWSRGLVGYGYTF	TGCATCGTCAGTCGCGGACGAGTTCAGGGAGCCCAGAAGCTGGTATTT	TGTGCCTGGAGTCGAGGGCTTGTAGGCTATGGCTACACCTTC	0	0	0	0	0	0	0	0	0	3	3	0.000687916	Small (1 < X <= 5)
clonotype 138	TRAV27.TRAJ36.TRAC;TRAV24.TRAJ20.TRAC	TRBV30.NA.TRBJ1-1.TRBC1	CAALTGANNLFF;CAFVLNDYKLSF	CAWSDSNTEAFF	TGTGCAGCCCTTACTGGGGCAAACAACCTCTTCTTT;TGTGCCTTCGTCCTTAACGACTACAAGCTCAGCTTT	TGTGCCTGGAGTGATAGTAACACTGAAGCTTTCTTT	0	0	1	0	1	1	0	0	0	0	3	0.000687916	Small (1 < X <= 5)
clonotype 139	TRAV27.TRAJ42.TRAC	TRBV5-1.NA.TRBJ1-5.TRBC1	CAGARGGSQGNLIF	CASSRTDPSNQPQHF	TGTGCAGGAGCTCGGGGAGGAAGCCAAGGAAATCTCATCTTT	TGCGCCAGCAGCCGAACAGACCCTAGCAATCAGCCCCAGCATTTT	0	0	1	2	0	0	0	0	0	0	3	0.000687916	Small (1 < X <= 5)
clonotype 152	TRAV29/DV5.TRAJ54.TRAC	TRBV20-1.NA.TRBJ1-2.TRBC1	CAASWGIQGAQKLVF	CSARDITGYTF	TGTGCAGCAAGCTGGGGAATTCAGGGAGCCCAGAAGCTGGTATTT	TGCAGTGCTAGAGATATAACGGGCTACACCTTC	0	0	1	2	0	0	0	0	0	0	3	0.000687916	Small (1 < X <= 5)
clonotype 157	TRAV35.TRAJ40.TRAC	TRBV6-5.NA.TRBJ2-1.TRBC2	CAGQRTSGTYKYIF	CASTLTSGYNEQFF	TGTGCTGGGCAGCGCACCTCAGGAACCTACAAATACATCTTT	TGTGCCAGCACCCTGACTAGCGGCTACAATGAGCAGTTCTTC	0	0	0	1	0	1	1	0	0	0	3	0.000687916	Small (1 < X <= 5)
clonotype 158	TRAV35.TRAJ57.TRAC	TRBV5-1.NA.TRBJ2-5.TRBC2	CAGFQGGSEKLVF	CASSFGRVRQETQYF	TGTGCTGGATTCCAGGGCGGATCTGAAAAGCTGGTCTTT	TGCGCCAGCAGCTTCGGGAGGGTGCGCCAAGAGACCCAGTACTTC	0	0	0	0	0	0	0	3	0	0	3	0.000687916	Small (1 < X <= 5)
clonotype 162	TRAV38-1.TRAJ33.TRAC	TRBV4-1.TRBD1.TRBJ2-5.TRBC2	CAFMKFYQLIW	CASSPQTGERETQYF	TGTGCTTTCATGAAGTTCTATCAGTTAATCTGG	TGCGCCAGCAGCCCCCAAACCGGGGAAAGGGAGACCCAGTACTTC	0	0	0	0	0	0	0	3	0	0	3	0.000687916	Small (1 < X <= 5)
clonotype 163	TRAV38-1.TRAJ36.TRAC	TRBV4-1.NA.TRBJ2-7.TRBC2	CAFMKLSATGANNLFF	CASSQEAALAVRTYEQYF	TGTGCTTTCATGAAGTTATCGGCGACTGGGGCAAACAACCTCTTCTTT	TGCGCCAGCAGCCAAGAAGCGGCTCTAGCGGTTCGTACCTACGAGCAGTACTTC	0	0	0	0	0	0	0	3	0	0	3	0.000687916	Small (1 < X <= 5)
clonotype 181	TRAV41.TRAJ37.TRAC	TRBV5-1.NA.TRBJ1-1.TRBC1	CAVNKVGSSNTGKLIF	CASSLLENTEAFF	TGTGCTGTCAATAAGGTGGGCTCTAGCAACACAGGCAAACTAATCTTT	TGCGCCAGCAGCTTACTCGAGAACACTGAAGCTTTCTTT	0	0	0	0	0	1	1	0	1	0	3	0.000687916	Small (1 < X <= 5)
clonotype 201	TRAV8-4.TRAJ43.TRAC	TRBV12-3.NA.TRBJ2-3.TRBC2	CAVSPNNNDMRF	CASSFSTRTDTQYF	TGTGCTGTGAGCCCTAATAACAATGACATGCGCTTT	TGTGCCAGCAGTTTTTCTACTAGGACAGATACGCAGTATTTT	0	0	0	0	0	0	2	1	0	0	3	0.000687916	Small (1 < X <= 5)
clonotype 204	TRAV8-4.TRAJ50.TRAC	TRBV4-2.NA.TRBJ2-5.TRBC2	CAVSPTLKTSYDKVIF	CASSQTDRVAETQYF	TGTGCTGTGAGTCCAACCCTGAAAACCTCCTACGACAAGGTGATATTT	TGTGCCAGCAGCCAGACCGACAGGGTGGCAGAGACCCAGTACTTC	0	0	0	0	2	0	1	0	0	0	3	0.000687916	Small (1 < X <= 5)
clonotype 224	TRAV9-2.TRAJ5.TRAC	TRBV7-9.NA.TRBJ1-1.TRBC1	CALVMDTGRRALTF	CASSPSKAGVLNTEAFF	TGTGCTCTGGTCATGGACACGGGCAGGAGAGCACTTACTTTT	TGTGCCAGCAGCCCATCTAAGGCGGGGGTTCTGAACACTGAAGCTTTCTTT	0	0	0	0	0	0	0	3	0	0	3	0.000687916	Small (1 < X <= 5)
clonotype 227	TRAV9-2.TRAJ58.TRAC	TRBV5-4.NA.TRBJ1-1.TRBC1	CALSRGETSGSRLTF	CASSLANDNTEAFF	TGTGCTCTGAGTAGGGGAGAAACCAGTGGCTCTAGGTTGACCTTT	TGTGCCAGCAGCTTGGCCAACGACAACACTGAAGCTTTCTTT	0	0	0	0	0	0	1	2	0	0	3	0.000687916	Small (1 < X <= 5)
clonotype 230	TRAV9-2.TRAJ9.TRAC	TRBV6-2.NA.TRBJ1-2.TRBC1	CAYTGGFKTIF	CASSYAGPYGYTF	TGTGCGTATACTGGAGGCTTCAAAACTATCTTT	TGTGCCAGCAGTTACGCAGGCCCCTATGGCTACACCTTC	0	0	0	0	0	0	0	3	0	0	3	0.000687916	Small (1 < X <= 5)
clonotype 1	NA	TRBV11-2.TRBD2.TRBJ2-1.TRBC2	NA	CASSSGLAGGSEQFF	NA	TGTGCCAGCAGCTCCGGACTAGCGGGAGGGAGTGAGCAGTTCTTC	0	0	2	0	0	0	0	0	0	0	2	0.00045861	Small (1 < X <= 5)
clonotype 3	NA	TRBV19.TRBD1.TRBJ2-2.TRBC2	NA	CASIQDRAAGELFF	NA	TGTGCCAGTATCCAGGACAGGGCGGCCGGGGAGCTGTTTTTT	0	0	0	1	0	0	1	0	0	0	2	0.00045861	Small (1 < X <= 5)
clonotype 5	NA	TRBV2.NA.TRBJ2-3.TRBC2	NA	CASRGEYPDTQYF	NA	TGTGCCAGCCGGGGGGAGTACCCAGATACGCAGTATTTT	0	0	0	0	0	1	0	1	0	0	2	0.00045861	Small (1 < X <= 5)
clonotype 6	NA	TRBV20-1.NA.TRBJ1-2.TRBC1	NA	CSARDWNGYTF	NA	TGCAGTGCTAGAGATTGGAATGGCTACACCTTC	0	0	0	0	0	2	0	0	0	0	2	0.00045861	Small (1 < X <= 5)
clonotype 7	NA	TRBV20-1.NA.TRBJ2-5.TRBC2	NA	CSYIQETQYF	NA	TGCAGTTATATTCAAGAGACCCAGTACTTC	0	0	0	0	0	0	0	2	0	0	2	0.00045861	Small (1 < X <= 5)
clonotype 8	NA	TRBV24-1.NA.TRBJ2-3.TRBC2	NA	CATSDPSGVGTDTQYF	NA	TGTGCCACCAGTGATCCAAGCGGGGTGGGCACAGATACGCAGTATTTT	0	0	0	0	0	0	0	2	0	0	2	0.00045861	Small (1 < X <= 5)
clonotype 10	NA	TRBV5-1.TRBD1.TRBJ1-1.TRBC1	NA	CASSRQGAGGTEAFF	NA	TGCGCCAGCAGCCGCCAGGGGGCCGGGGGAACTGAAGCTTTCTTT	1	0	0	0	0	0	1	0	0	0	2	0.00045861	Small (1 < X <= 5)
clonotype 11	NA	TRBV7-2.NA.TRBJ2-1.TRBC2	NA	CASSSTRSYNEQFF	NA	TGTGCCAGCAGCTCGACAAGATCCTACAATGAGCAGTTCTTC	0	0	0	0	0	0	0	2	0	0	2	0.00045861	Small (1 < X <= 5)
clonotype 12	NA	TRBV7-2.TRBD2.TRBJ2-5.TRBC2	NA	CASSLGGLAGAPGETQYF	NA	TGTGCCAGCAGCTTAGGGGGACTAGCGGGGGCCCCTGGGGAGACCCAGTACTTC	0	0	2	0	0	0	0	0	0	0	2	0.00045861	Small (1 < X <= 5)
clonotype 13	NA	TRBV7-9.NA.TRBJ2-3.TRBC2	NA	CASSLGAGTLSTDTQYF	NA	TGTGCCAGCAGCTTAGGGGCCGGGACACTTAGCACAGATACGCAGTATTTT	1	0	0	1	0	0	0	0	0	0	2	0.00045861	Small (1 < X <= 5)
clonotype 15	TRAV1-2.TRAJ39.TRAC	TRBV20-1.NA.TRBJ2-1.TRBC2	CAVYNAGNMLTF	CSARAGGPGDEQFF	TGTGCTGTTTATAATGCAGGCAACATGCTCACCTTT	TGCAGTGCTCGAGCGGGAGGCCCGGGGGATGAGCAGTTCTTC	0	0	0	0	0	0	0	2	0	0	2	0.00045861	Small (1 < X <= 5)
clonotype 17	TRAV12-1.TRAJ26.TRAC	TRBV12-4.NA.TRBJ2-1.TRBC2	CAVNYGQNFVF	CASSTQGVGYNEQFF	TGTGCGGTGAACTATGGTCAGAATTTTGTCTTT	TGTGCCAGCAGTACCCAGGGGGTAGGTTACAATGAGCAGTTCTTC	0	0	0	0	2	0	0	0	0	0	2	0.00045861	Small (1 < X <= 5)
clonotype 19	TRAV12-1.TRAJ26.TRAC	TRBV12-4.NA.TRBJ2-7.TRBC2	CVVNNGQNFVF	CASSSQAVGLSEQYF	TGTGTGGTGAACAATGGTCAGAATTTTGTCTTT	TGTGCCAGCAGTTCACAGGCGGTTGGGCTATCCGAGCAGTACTTC	0	0	1	0	0	0	1	0	0	0	2	0.00045861	Small (1 < X <= 5)
clonotype 20	TRAV12-1.TRAJ27.TRAC	TRBV24-1.TRBD1.TRBJ1-2.TRBC1	CAVNRVGNAGKSTF	CATSDPGQGGYGYTF	TGTGCGGTGAACAGAGTCGGCAATGCAGGCAAATCAACCTTT	TGTGCCACCAGTGACCCCGGACAGGGAGGCTATGGCTACACCTTC	0	0	1	0	1	0	0	0	0	0	2	0.00045861	Small (1 < X <= 5)
clonotype 23	TRAV12-1.TRAJ37.TRAC	TRBV12-3.NA.TRBJ2-2.TRBC2	CVVNTGGSSNTGKLIF	CASSLARGLAVRNTGELFF	TGTGTGGTGAACACGGGGGGCTCTAGCAACACAGGCAAACTAATCTTT	TGTGCCAGCAGTTTGGCCCGGGGGCTAGCGGTGCGGAACACCGGGGAGCTGTTTTTT	0	0	0	0	0	0	0	2	0	0	2	0.00045861	Small (1 < X <= 5)
clonotype 24	TRAV12-1.TRAJ4.TRAC	TRBV5-1.TRBD1.TRBJ1-6.TRBC1	CVVNPGGYNKLIF	CASSQEGQGAGSPLHF	TGTGTGGTGAACCCTGGTGGCTACAATAAGCTGATTTTT	TGCGCCAGCAGCCAAGAGGGACAGGGGGCAGGCTCACCCCTCCACTTT	0	0	1	0	0	1	0	0	0	0	2	0.00045861	Small (1 < X <= 5)
clonotype 25	TRAV12-1.TRAJ40.TRAC	TRBV11-2.NA.TRBJ2-3.TRBC2;TRBV11-2.TRBD2.TRBJ2-1.TRBC2	CVVNIPSGTYKYIF	CASSLLVSATSTDTQYF;CASSSGLAGGNEQFF	TGTGTGGTGAACATCCCATCAGGAACCTACAAATACATCTTT	TGTGCCAGCAGCCTACTGGTGAGCGCCACTAGCACAGATACGCAGTATTTT;TGTGCCAGCAGCTCGGGACTAGCGGGGGGGAATGAGCAGTTCTTC	0	0	0	0	0	0	0	2	0	0	2	0.00045861	Small (1 < X <= 5)
clonotype 27	TRAV12-1.TRAJ40.TRAC	TRBV5-5.NA.TRBJ2-1.TRBC2	CVVNIPQGTYKYIF	CASSLGLAREQFF	TGTGTGGTGAACATCCCCCAAGGAACCTACAAATACATCTTT	TGTGCCAGCAGCTTGGGGTTAGCACGAGAGCAGTTCTTC	0	0	0	0	0	0	0	2	0	0	2	0.00045861	Small (1 < X <= 5)
clonotype 31	TRAV12-1.TRAJ49.TRAC	TRBV12-4.NA.TRBJ2-7.TRBC2	CAVNTGNQFYF	CASSPHQQGTAEQYF	TGTGCGGTGAACACCGGTAACCAGTTCTATTTT	TGTGCCAGCAGCCCCCACCAACAGGGCACTGCCGAGCAGTACTTC	0	0	2	0	0	0	0	0	0	0	2	0.00045861	Small (1 < X <= 5)
clonotype 32	TRAV12-1.TRAJ49.TRAC	TRBV12-4.TRBD1.TRBJ2-7.TRBC2;TRBV12-4.NA.TRBJ2-7.TRBC2	CVVTGNQFYF	CASSPFDRGLGEQYF;CASSFAQGTYEQYF	TGTGTGGTGACCGGTAACCAGTTCTATTTT	TGTGCCAGCAGCCCATTCGACAGGGGGCTGGGGGAGCAGTACTTC;TGTGCCAGCAGTTTCGCGCAGGGGACCTACGAGCAGTACTTC	0	0	0	1	1	0	0	0	0	0	2	0.00045861	Small (1 < X <= 5)
clonotype 33	TRAV12-1.TRAJ52.TRAC	TRBV14.NA.TRBJ2-1.TRBC2	CAGETSYGKLTF	CASSSHNEQFF	TGTGCGGGGGAGACTAGCTATGGAAAGCTGACATTT	TGTGCCAGCAGCTCACACAATGAGCAGTTCTTC	0	0	0	0	1	1	0	0	0	0	2	0.00045861	Small (1 < X <= 5)
clonotype 35	TRAV12-2.TRAJ15.TRAC	TRBV27.TRBD2.TRBJ2-1.TRBC2	CAVNSPNQAGTALIF	CASRRLAGGNEQFF	TGTGCCGTGAACTCGCCTAACCAGGCAGGAACTGCTCTGATCTTT	TGTGCCAGCAGGAGACTAGCGGGGGGAAATGAGCAGTTCTTC	0	0	0	0	0	0	0	2	0	0	2	0.00045861	Small (1 < X <= 5)
clonotype 39	TRAV12-2.TRAJ22.TRAC	TRBV20-1.NA.TRBJ2-3.TRBC2;TRBV20-1.NA.TRBJ1-5.TRBC1	CAVVGPARQLTF	CSARVSSDTQYF;CSARQLYDQPQHF	TGTGCCGTGGTGGGCCCTGCAAGGCAACTGACCTTT	TGCAGTGCTAGAGTGAGTTCAGATACGCAGTATTTT;TGCAGTGCTCGACAGTTGTACGATCAGCCCCAGCATTTT	0	0	0	0	0	0	0	2	0	0	2	0.00045861	Small (1 < X <= 5)
clonotype 40	TRAV12-2.TRAJ26.TRAC	TRBV5-1.NA.TRBJ2-1.TRBC2	CAVNNYGQNFVF	CASSLNAGEVNEQFF	TGTGCCGTGAATAACTATGGTCAGAATTTTGTCTTT	TGCGCCAGCAGCTTGAATGCGGGAGAGGTAAATGAGCAGTTCTTC	0	0	0	1	0	0	0	1	0	0	2	0.00045861	Small (1 < X <= 5)
clonotype 43	TRAV12-2.TRAJ40.TRAC	TRBV27.TRBD1.TRBJ2-2.TRBC2	CAVNRGTYKYIF	CASSLSGGGADTGELFF	TGTGCCGTGAATAGAGGAACCTACAAATACATCTTT	TGTGCCAGCAGTTTATCGGGGGGAGGGGCCGACACCGGGGAGCTGTTTTTT	0	0	0	0	0	0	0	2	0	0	2	0.00045861	Small (1 < X <= 5)
clonotype 46	TRAV12-2.TRAJ49.TRAC	TRBV5-1.NA.TRBJ2-5.TRBC2	CAVEWNQFYF	CASRPGAGETQYF	TGTGCCGTGGAATGGAACCAGTTCTATTTT	TGCGCCAGCAGGCCGGGAGCCGGGGAGACCCAGTACTTC	0	0	0	0	0	0	0	2	0	0	2	0.00045861	Small (1 < X <= 5)
clonotype 47	TRAV12-3.TRAJ16.TRAC	TRBV7-9.NA.TRBJ2-3.TRBC2	CAMSRFSDGQKLLF	CASSLAAGGITDTQYF	TGTGCAATGAGTAGGTTTTCAGATGGCCAGAAGCTGCTCTTT	TGTGCCAGCAGCTTAGCGGCGGGAGGGATCACAGATACGCAGTATTTT	0	0	0	0	0	0	0	2	0	0	2	0.00045861	Small (1 < X <= 5)
clonotype 50	TRAV13-1.TRAJ35.TRAC	TRBV20-1.TRBD2.TRBJ2-1.TRBC2;TRBV11-2.NA.TRBJ2-4.TRBC2	CAASMGGFGNVLHC	CSAPGLAGEPNEQFF;CASSLAEVGRSLSKAKNIQYF	TGTGCAGCAAGTATGGGAGGCTTTGGGAATGTGCTGCATTGC	TGCAGTGCCCCGGGACTAGCGGGCGAGCCCAATGAGCAGTTCTTC;TGTGCCAGCAGCTTAGCGGAGGTAGGGCGCTCCCTCAGCAAAGCCAAAAACATTCAGTACTTC	0	0	0	0	0	1	0	1	0	0	2	0.00045861	Small (1 < X <= 5)
clonotype 57	TRAV13-1.TRAJ52.TRAC	TRBV10-3.TRBD2.TRBJ2-5.TRBC2	CAASYGKLTF	CATGPGLAVGETQYF	TGTGCAGCAAGTTATGGAAAGCTGACATTT	TGTGCCACGGGACCGGGACTAGCGGTCGGAGAGACCCAGTACTTC	0	0	0	0	0	0	0	2	0	0	2	0.00045861	Small (1 < X <= 5)
clonotype 58	TRAV13-1.TRAJ9.TRAC	TRBV5-4.NA.TRBJ2-5.TRBC2	CAASSGGGGFKTIF	CASRRDFPQETQYF	TGTGCAGCAAGTTCAGGGGGTGGAGGCTTCAAAACTATCTTT	TGTGCCAGCAGACGGGACTTTCCCCAAGAGACCCAGTACTTC	0	0	1	0	1	0	0	0	0	0	2	0.00045861	Small (1 < X <= 5)
clonotype 59	TRAV13-2.TRAJ13.TRAC	TRBV28.NA.TRBJ1-6.TRBC1	CADCYSGGYQKVTF	CASRIQGSNSPLHF	TGTGCAGACTGCTATTCTGGGGGTTACCAGAAAGTTACCTTT	TGTGCCAGCAGGATACAGGGTTCTAATTCACCCCTCCACTTT	0	0	2	0	0	0	0	0	0	0	2	0.00045861	Small (1 < X <= 5)
clonotype 60	TRAV13-2.TRAJ13.TRAC	TRBV5-6.NA.TRBJ1-2.TRBC1	CAENGASGGYQKVTF	CASSSEGRGFYGYTF	TGTGCAGAGAATGGGGCCTCTGGGGGTTACCAGAAAGTTACCTTT	TGTGCCAGCAGCTCGGAGGGAAGGGGGTTCTATGGCTACACCTTC	0	0	0	1	0	0	0	0	1	0	2	0.00045861	Small (1 < X <= 5)
clonotype 66	TRAV13-2.TRAJ5.TRAC	TRBV20-1.TRBD2.TRBJ2-5.TRBC2	CAENTGRRALTF	CSALPPGTSGNRYF	TGTGCAGAGAACACGGGCAGGAGAGCACTTACTTTT	TGCAGTGCTCTACCCCCCGGGACTAGCGGGAATAGGTACTTC	0	0	2	0	0	0	0	0	0	0	2	0.00045861	Small (1 < X <= 5)
clonotype 68	TRAV14/DV4.TRAJ31.TRAC	TRBV27.NA.TRBJ1-6.TRBC1	CAMSRPFNARLMF	CASSPTLEYNSPLHF	TGTGCAATGAGCCGCCCCTTTAATGCCAGACTCATGTTT	TGTGCCAGCAGTCCCACACTCGAGTATAATTCACCCCTCCACTTT	0	0	0	0	0	0	0	2	0	0	2	0.00045861	Small (1 < X <= 5)
clonotype 70	TRAV14/DV4.TRAJ41.TRAC	TRBV5-6.NA.TRBJ1-1.TRBC1	CAMRRSGYALNF	CASSPGNLAWGTEAFF	TGTGCAATGAGACGTTCCGGGTATGCACTCAACTTC	TGTGCCAGCAGCCCAGGAAATTTAGCTTGGGGCACTGAAGCTTTCTTT	0	0	1	0	0	0	1	0	0	0	2	0.00045861	Small (1 < X <= 5)
clonotype 72	TRAV14/DV4.TRAJ58.TRAC	TRBV5-4.NA.TRBJ2-1.TRBC2	CAMREGETSGSRLTF	CASSFGNSYNEQFF	TGTGCAATGAGAGAGGGAGAAACCAGTGGCTCTAGGTTGACCTTT	TGTGCCAGCAGCTTTGGGAACTCCTACAATGAGCAGTTCTTC	0	0	0	0	0	0	0	2	0	0	2	0.00045861	Small (1 < X <= 5)
clonotype 76	TRAV17.TRAJ39.TRAC	TRBV11-2.NA.TRBJ1-6.TRBC1	CATRNAGNMLTF	CASSSDRVGSPLHF	TGTGCTACAAGGAATGCAGGCAACATGCTCACCTTT	TGTGCCAGCAGCTCAGACAGGGTTGGTTCACCCCTCCACTTT	0	0	0	0	0	1	0	0	1	0	2	0.00045861	Small (1 < X <= 5)
clonotype 79	TRAV17.TRAJ58.TRAC	TRBV5-4.NA.TRBJ2-3.TRBC2	CATGKETSGSRLTF	CASSGGNGDTQYF	TGTGCTACGGGCAAAGAAACCAGTGGCTCTAGGTTGACCTTT	TGTGCCAGCAGCGGGGGTAATGGAGATACGCAGTATTTT	0	0	0	0	0	1	0	1	0	0	2	0.00045861	Small (1 < X <= 5)
clonotype 81	TRAV19.TRAJ37.TRAC	TRBV28.NA.TRBJ1-5.TRBC1	CALSEDGSSNTGKLIF	CASSTSLSNQPQHF	TGTGCTCTGAGTGAGGATGGCTCTAGCAACACAGGCAAACTAATCTTT	TGTGCCAGCAGTACGAGCCTTAGCAATCAGCCCCAGCATTTT	0	0	1	1	0	0	0	0	0	0	2	0.00045861	Small (1 < X <= 5)
clonotype 82	TRAV19.TRAJ37.TRAC	TRBV28.NA.TRBJ1-5.TRBC1	CALSEGGSSNTGKLIF	CASSLFLSNQPQHF	TGTGCTCTGAGTGAGGGGGGCTCTAGCAACACAGGCAAACTAATCTTT	TGTGCCAGCAGTTTGTTCCTGAGCAATCAGCCCCAGCATTTT	0	0	0	0	0	1	1	0	0	0	2	0.00045861	Small (1 < X <= 5)
clonotype 88	TRAV2.TRAJ20.TRAC;TRAV3.TRAJ40.TRAC	TRBV5-8.NA.TRBJ2-2.TRBC2	CAPPNDYKLSF;CAVRPSGTYKYIF	CASNPLGGSNTGELFF	TGTGCTCCCCCTAACGACTACAAGCTCAGCTTT;TGTGCTGTGAGGCCCTCAGGAACCTACAAATACATCTTT	TGTGCCAGCAACCCGTTAGGGGGATCGAACACCGGGGAGCTGTTTTTT	0	0	0	0	0	1	1	0	0	0	2	0.00045861	Small (1 < X <= 5)
clonotype 89	TRAV2.TRAJ21.TRAC	TRBV6-1.NA.TRBJ2-7.TRBC2	CAVYNFNKFYF	CASSWDNYEQYF	TGTGCTGTATACAACTTCAACAAATTTTACTTT	TGTGCCAGCAGCTGGGACAACTACGAGCAGTACTTC	0	0	0	0	0	0	0	2	0	0	2	0.00045861	Small (1 < X <= 5)
clonotype 90	TRAV2.TRAJ37.TRAC;TRAV9-2.TRAJ23.TRAC	TRBV30.NA.TRBJ2-7.TRBC2	CAFISSNTGKLIF;CALRNQGGKLIF	CAWSVLGGAVVYEQYF	TGTGCCTTCATCTCTAGCAACACAGGCAAACTAATCTTT;TGTGCTCTAAGAAACCAGGGAGGAAAGCTTATCTTC	TGTGCCTGGAGTGTACTGGGGGGCGCCGTAGTTTACGAGCAGTACTTC	0	0	0	0	1	1	0	0	0	0	2	0.00045861	Small (1 < X <= 5)
clonotype 91	TRAV2.TRAJ9.TRAC	TRBV6-1.NA.TRBJ2-7.TRBC2	CAVEGTGGFKTIF	CASSPGRGNRYEQYF	TGTGCTGTGGAGGGGACTGGAGGCTTCAAAACTATCTTT	TGTGCCAGCAGTCCCGGCAGGGGAAACCGTTACGAGCAGTACTTC	0	0	0	1	0	0	1	0	0	0	2	0.00045861	Small (1 < X <= 5)
clonotype 92	TRAV20.TRAJ21.TRAC	TRBV5-1.TRBD1.TRBJ1-1.TRBC1	CAVLNKFYF	CASSLEGEGGTEAFF	TGTGCTGTGCTCAACAAATTTTACTTT	TGCGCCAGCAGCTTGGAAGGGGAAGGCGGCACTGAAGCTTTCTTT	0	0	0	0	0	1	0	1	0	0	2	0.00045861	Small (1 < X <= 5)
clonotype 93	TRAV20.TRAJ27.TRAC	TRBV5-4.NA.TRBJ2-3.TRBC2	CAVQAGTNAGKSTF	CASSLGTDTDTQYF	TGTGCTGTGCAGGCAGGGACCAATGCAGGCAAATCAACCTTT	TGTGCCAGCAGCTTAGGGACAGACACAGATACGCAGTATTTT	0	0	0	1	1	0	0	0	0	0	2	0.00045861	Small (1 < X <= 5)
clonotype 95	TRAV20.TRAJ57.TRAC	TRBV6-5.NA.TRBJ1-3.TRBC1	CAVSQGGSEKLVF	CASSYSPPAGSGNTIYF	TGTGCTGTTTCTCAGGGCGGATCTGAAAAGCTGGTCTTT	TGTGCCAGCAGTTACTCGCCCCCGGCAGGCTCTGGAAACACCATATATTTT	0	0	0	0	0	0	0	0	2	0	2	0.00045861	Small (1 < X <= 5)
clonotype 96	TRAV20.TRAJ58.TRAC;TRAV38-2/DV8.TRAJ46.TRAC	TRBV9.NA.TRBJ1-3.TRBC1	CAAKETSGSRLTF;CAYRGRKSSGDKLTF	CASSVDAGSQFGNTIYF	TGTGCTGCTAAAGAAACCAGTGGCTCTAGGTTGACCTTT;TGTGCTTATAGGGGGCGGAAAAGCAGCGGAGACAAGCTGACTTTT	TGTGCCAGCAGCGTAGATGCAGGGTCACAATTTGGAAACACCATATATTTT	0	0	0	1	0	0	1	0	0	0	2	0.00045861	Small (1 < X <= 5)
clonotype 97	TRAV21.TRAJ22.TRAC	TRBV11-2.NA.TRBJ2-2.TRBC2	CAVRQAARQLTF	CASSLVGEAGELFF	TGTGCTGTGAGGCAGGCTGCAAGGCAACTGACCTTT	TGTGCCAGCAGCTTAGTGGGTGAAGCCGGGGAGCTGTTTTTT	0	0	0	0	0	0	0	0	0	2	2	0.00045861	Small (1 < X <= 5)
clonotype 98	TRAV21.TRAJ24.TRAC	TRBV5-6.NA.TRBJ1-2.TRBC1	CAVGSTDSWGKLQF	CASSSRAVSFNYGYTF	TGTGCTGTCGGATCAACTGACAGCTGGGGGAAATTGCAGTTT	TGTGCCAGCAGCTCCCGGGCAGTCTCGTTCAACTATGGCTACACCTTC	0	0	0	0	0	2	0	0	0	0	2	0.00045861	Small (1 < X <= 5)
clonotype 99	TRAV21.TRAJ40.TRAC	TRBV7-2.NA.TRBJ1-1.TRBC1	CAVNRAYKYIF	CASSLVALEMNTEAFF	TGTGCTGTGAATAGGGCCTACAAATACATCTTT	TGTGCCAGCAGCTTAGTAGCGCTGGAGATGAACACTGAAGCTTTCTTT	0	0	0	0	0	0	1	0	0	1	2	0.00045861	Small (1 < X <= 5)
clonotype 104	TRAV22.TRAJ32.TRAC	TRBV5-4.TRBD2.TRBJ2-7.TRBC2	CAVERYGGATNKLIF	CASSLQGVAGGYEQYV	TGTGCTGTGGAGCGCTATGGTGGTGCTACAAACAAGCTCATCTTT	TGTGCCAGCAGCTTGCAGGGGGTAGCGGGAGGGTACGAGCAGTACGTC	0	0	0	0	0	0	0	2	0	0	2	0.00045861	Small (1 < X <= 5)
clonotype 105	TRAV22.TRAJ52.TRAC	TRBV18.NA.TRBJ1-2.TRBC1	CAVSFAGGTSYGKLTF	CASSPDTYGYTF	TGTGCTGTCTCCTTCGCTGGTGGTACTAGCTATGGAAAGCTGACATTT	TGTGCCAGCTCACCCGACACCTATGGCTACACCTTC	0	0	0	0	0	1	0	0	1	0	2	0.00045861	Small (1 < X <= 5)
clonotype 106	TRAV23/DV6.TRAJ18.TRAC	TRBV29-1.NA.TRBJ2-3.TRBC2	CAAVRGSTLGRLYF	CSGSFTDTQYF	TGTGCAGCAGTCCGAGGCTCAACCCTGGGGAGGCTATACTTT	TGCAGCGGGAGCTTCACAGATACGCAGTATTTT	0	0	0	0	1	0	0	0	1	0	2	0.00045861	Small (1 < X <= 5)
clonotype 107	TRAV23/DV6.TRAJ30.TRAC;TRAV3.TRAJ30.TRAC	TRBV4-1.TRBD2.TRBJ2-1.TRBC2	CAATPLMNRDDKIIF;CAVSPRDDKIIF	CASSQGASGSMRNEQFF	TGTGCAGCAACCCCCCTTATGAACAGAGATGACAAGATCATCTTT;TGTGCTGTGAGCCCCAGAGATGACAAGATCATCTTT	TGCGCCAGCAGCCAAGGGGCTAGCGGGAGTATGAGGAATGAGCAGTTCTTC	0	0	0	1	0	0	1	0	0	0	2	0.00045861	Small (1 < X <= 5)
clonotype 108	TRAV23/DV6.TRAJ31.TRAC	TRBV18.NA.TRBJ1-2.TRBC1	CAASGDNNARLMF	CASSPGRGIYGYTF	TGTGCAGCAAGCGGAGACAACAATGCCAGACTCATGTTT	TGTGCCAGCTCACCCGGCAGGGGAATCTATGGCTACACCTTC	0	0	0	0	2	0	0	0	0	0	2	0.00045861	Small (1 < X <= 5)
clonotype 109	TRAV23/DV6.TRAJ44.TRAC	TRBV7-2.NA.TRBJ2-6.TRBC2	CAASITHTGTASKLTF	CASSKLRRSSGANVLTF	TGTGCAGCAAGCATTACACATACCGGCACTGCCAGTAAACTCACCTTT	TGTGCCAGCAGCAAACTCCGGCGAAGCTCTGGGGCCAACGTCCTGACTTTC	0	0	0	0	0	0	0	2	0	0	2	0.00045861	Small (1 < X <= 5)
clonotype 110	TRAV24.TRAJ16.TRAC	TRBV28.NA.TRBJ2-7.TRBC2	CAQGGQKLLF	CASSSGLPYAGQYV	TGTGCCCAGGGGGGCCAGAAGCTGCTCTTT	TGTGCCAGCAGTTCCGGGCTCCCCTACGCCGGGCAGTACGTC	0	0	0	0	0	0	0	2	0	0	2	0.00045861	Small (1 < X <= 5)
clonotype 111	TRAV24.TRAJ52.TRAC	TRBV4-2.NA.TRBJ2-1.TRBC2	CALRANAGGTSYGKLTF	CASSQERRRYNEQFF	TGTGCCTTGCGAGCTAATGCTGGTGGTACTAGCTATGGAAAGCTGACATTT	TGTGCCAGCAGCCAAGAAAGGAGAAGATACAATGAGCAGTTCTTC	0	0	0	0	0	2	0	0	0	0	2	0.00045861	Small (1 < X <= 5)
clonotype 113	TRAV25.TRAJ22.TRAC	TRBV30.NA.TRBJ1-2.TRBC1	CAGQTGSARQLTF	CAWSLSISYGYTF	TGTGCAGGGCAGACTGGTTCTGCAAGGCAACTGACCTTT	TGTGCCTGGAGTCTCAGTATCTCCTATGGCTACACCTTC	0	0	0	0	0	0	0	0	0	2	2	0.00045861	Small (1 < X <= 5)
clonotype 116	TRAV26-1.TRAJ11.TRAC	TRBV7-2.NA.TRBJ2-3.TRBC2	CIVRGNSGYSTLTF	CASSWFGGEGDTQYF	TGCATCGTCAGAGGCAATTCAGGATACAGCACCCTCACCTTT	TGTGCCAGCAGCTGGTTTGGCGGGGAGGGAGATACGCAGTATTTT	0	0	0	0	0	0	0	2	0	0	2	0.00045861	Small (1 < X <= 5)
clonotype 117	TRAV26-1.TRAJ15.TRAC	TRBV3-1.NA.TRBJ1-1.TRBC1	CIVRAAIKNQAGTALIF	CASSHLGNAEAFF	TGCATCGTCAGAGCCGCAATTAAGAACCAGGCAGGAACTGCTCTGATCTTT	TGTGCCAGCAGCCACCTGGGAAACGCTGAAGCTTTCTTT	0	0	1	0	0	1	0	0	0	0	2	0.00045861	Small (1 < X <= 5)
clonotype 118	TRAV26-1.TRAJ16.TRAC	TRBV30.NA.TRBJ2-7.TRBC2	CIVRGFSDGQKLLF	CAWSRGREGPYEQYF	TGCATCGTCAGAGGCTTTTCAGATGGCCAGAAGCTGCTCTTT	TGTGCCTGGAGTAGAGGGCGGGAGGGCCCCTACGAGCAGTACTTC	0	0	0	0	0	0	0	0	0	2	2	0.00045861	Small (1 < X <= 5)
clonotype 119	TRAV26-1.TRAJ20.TRAC	TRBV5-6.NA.TRBJ2-5.TRBC2	CIVRVAKDSKLSF	CASSFTTSKVETQYF	TGCATCGTCAGAGTCGCGAAAGATAGCAAGCTCAGCTTT	TGTGCCAGCAGCTTCACCACTAGCAAGGTAGAGACCCAGTACTTC	0	0	0	0	0	0	1	1	0	0	2	0.00045861	Small (1 < X <= 5)
clonotype 120	TRAV26-1.TRAJ23.TRAC	TRBV20-1.NA.TRBJ2-7.TRBC2	CIVRVANQGGKLIF	CSASSDSLWEQYF	TGCATCGTCAGAGTCGCTAACCAGGGAGGAAAGCTTATCTTC	TGCAGTGCTAGTTCGGACTCGCTTTGGGAGCAGTACTTC	0	0	1	0	0	1	0	0	0	0	2	0.00045861	Small (1 < X <= 5)
clonotype 123	TRAV26-1.TRAJ34.TRAC	TRBV3-1.NA.TRBJ2-7.TRBC2	CIVRLPWGENTDKLIF	CASSRTSGYEQYF	TGCATCGTCAGACTCCCTTGGGGGGAAAACACCGACAAGCTCATCTTT	TGTGCCAGCAGCAGGACTAGCGGATACGAGCAGTACTTC	0	0	0	0	0	2	0	0	0	0	2	0.00045861	Small (1 < X <= 5)
clonotype 124	TRAV26-1.TRAJ36.TRAC	TRBV5-6.NA.TRBJ2-7.TRBC2	CIVRVAIQTGANNLFF	CASSLAGGHPEQYV	TGCATCGTCAGAGTCGCGATCCAAACTGGGGCAAACAACCTCTTCTTT	TGTGCCAGCAGCCTAGCGGGAGGACATCCCGAGCAGTACGTC	0	0	0	0	0	0	0	2	0	0	2	0.00045861	Small (1 < X <= 5)
clonotype 125	TRAV26-1.TRAJ37.TRAC	TRBV27.NA.TRBJ2-3.TRBC2	CIVRGINTGKLIF	CASSRGGSGTDTQYF	TGCATCGTCAGAGGTATCAACACAGGCAAACTAATCTTT	TGTGCCAGCAGCCGAGGGGGTAGCGGCACAGATACGCAGTATTTT	0	0	0	0	0	0	0	2	0	0	2	0.00045861	Small (1 < X <= 5)
clonotype 126	TRAV26-1.TRAJ37.TRAC	TRBV12-4.NA.TRBJ2-2.TRBC2	CIVRGGSSNTGKLIF	CASSLHRGAGELFF	TGCATCGTCAGAGGTGGCTCTAGCAACACAGGCAAACTAATCTTT	TGTGCCAGCAGTTTACACCGGGGAGCCGGGGAGCTGTTTTTT	0	0	0	1	0	1	0	0	0	0	2	0.00045861	Small (1 < X <= 5)
clonotype 127	TRAV26-1.TRAJ37.TRAC	TRBV7-9.NA.TRBJ1-2.TRBC1	CIVPFSLSSNTGKLIF	CASSLNGYTF	TGCATCGTCCCATTCTCACTCTCTAGCAACACAGGCAAACTAATCTTT	TGTGCCAGCAGCTTAAATGGCTACACCTTC	0	0	0	2	0	0	0	0	0	0	2	0.00045861	Small (1 < X <= 5)
clonotype 128	TRAV26-1.TRAJ40.TRAC	TRBV5-6.NA.TRBJ2-5.TRBC2	CIVNAGTYKYIF	CASSLGPTRQGGKGKATQYF	TGCATCGTCAACGCAGGAACCTACAAATACATCTTT	TGTGCCAGCAGCTTGGGACCCACTCGACAGGGAGGAAAGGGAAAGGCGACCCAGTACTTC	0	0	1	0	0	0	1	0	0	0	2	0.00045861	Small (1 < X <= 5)
clonotype 130	TRAV26-1.TRAJ45.TRAC	TRBV6-6.NA.TRBJ2-7.TRBC2	CIVRVAGSGGGADGLTF	CASSQSGAYEQYF	TGCATCGTCAGAGTCGCGGGATCAGGAGGAGGTGCTGACGGACTCACCTTT	TGTGCCAGCAGCCAGTCCGGCGCCTACGAGCAGTACTTC	0	0	0	0	0	1	0	1	0	0	2	0.00045861	Small (1 < X <= 5)
clonotype 131	TRAV26-1.TRAJ45.TRAC	TRBV5-1.NA.TRBJ1-2.TRBC1	CIVRVGSGGGADGLTF	CASSPGHMPNYGYTF	TGCATCGTCAGAGTCGGGTCAGGAGGAGGTGCTGACGGACTCACCTTT	TGCGCCAGCAGCCCGGGACATATGCCGAACTATGGCTACACCTTC	0	0	0	1	0	1	0	0	0	0	2	0.00045861	Small (1 < X <= 5)
clonotype 132	TRAV26-1.TRAJ49.TRAC	TRBV4-2.NA.TRBJ2-3.TRBC2	CIVRVITGNQFYF	CASSQSASSPSTDTQYF	TGCATCGTCAGAGTGATCACCGGTAACCAGTTCTATTTT	TGTGCCAGCAGCCAGAGCGCAAGCTCCCCTAGCACAGATACGCAGTATTTT	0	0	0	2	0	0	0	0	0	0	2	0.00045861	Small (1 < X <= 5)
clonotype 136	TRAV26-2.TRAJ28.TRAC	TRBV5-1.NA.TRBJ2-1.TRBC2	CILRPAYSGAGSYQLTF	CASSRDVDYNEQFF	TGCATCCTGAGACCAGCATACTCTGGGGCTGGGAGTTACCAACTCACTTTC	TGCGCCAGCAGCCGCGACGTTGACTACAATGAGCAGTTCTTC	0	0	0	0	0	0	0	2	0	0	2	0.00045861	Small (1 < X <= 5)
clonotype 137	TRAV27.TRAJ27.TRAC;TRAV21.TRAJ48.TRAC	TRBV6-1.NA.TRBJ1-5.TRBC1	CAGASTNAGKSTF;CAVVDEKLTF	CASSERVGALNQPQHF	TGTGCAGGAGCGAGCACCAATGCAGGCAAATCAACCTTT;TGTGCTGTGGTTGATGAGAAATTAACCTTT	TGTGCCAGCAGTGAAAGGGTCGGGGCTCTCAATCAGCCCCAGCATTTT	0	0	0	0	1	0	1	0	0	0	2	0.00045861	Small (1 < X <= 5)
clonotype 140	TRAV27.TRAJ49.TRAC	TRBV5-1.TRBD1.TRBJ2-7.TRBC2	CAPRNTGNQFYF	CASSLGAGGSNEQYF	TGTGCTCCTCGTAACACCGGTAACCAGTTCTATTTT	TGCGCCAGCAGCTTGGGGGCAGGGGGCTCCAACGAGCAGTACTTC	0	0	0	0	0	0	0	2	0	0	2	0.00045861	Small (1 < X <= 5)
clonotype 141	TRAV29/DV5.TRAJ16.TRAC	TRBV5-1.NA.TRBJ2-2.TRBC2	CAASGFSDGQKLLF	CASSGQATNTGELFF	TGTGCAGCAAGCGGGTTTTCAGATGGCCAGAAGCTGCTCTTT	TGCGCCAGCTCCGGACAGGCTACGAACACCGGGGAGCTGTTTTTT	0	0	1	0	0	1	0	0	0	0	2	0.00045861	Small (1 < X <= 5)
clonotype 143	TRAV29/DV5.TRAJ32.TRAC;TRAV27.TRAJ49.TRAC	TRBV20-1.NA.TRBJ2-1.TRBC2	CAASESGGATNKLIF;CAGRLGNQFYF	CSANWGNEQFF	TGTGCAGCAAGCGAGAGTGGTGGTGCTACAAACAAGCTCATCTTT;TGTGCAGGTCGCCTTGGTAACCAGTTCTATTTT	TGCAGTGCTAACTGGGGCAATGAGCAGTTCTTC	0	0	0	1	0	0	0	0	1	0	2	0.00045861	Small (1 < X <= 5)
clonotype 144	TRAV29/DV5.TRAJ37.TRAC	TRBV20-1.NA.TRBJ1-1.TRBC1	CAALKGSSNTGKLIF	CSVKGPNRGWYTEAFF	TGTGCAGCCCTTAAGGGCTCTAGCAACACAGGCAAACTAATCTTT	TGCAGTGTTAAGGGACCCAACAGGGGTTGGTACACTGAAGCTTTCTTT	0	0	1	1	0	0	0	0	0	0	2	0.00045861	Small (1 < X <= 5)
clonotype 145	TRAV29/DV5.TRAJ41.TRAC	TRBV19.NA.TRBJ2-2.TRBC2	CAARDRNSGYALNF	CASMDLAPGELFF	TGTGCAGCAAGAGACAGGAATTCCGGGTATGCACTCAACTTC	TGTGCCAGTATGGATCTAGCTCCCGGGGAGCTGTTTTTT	0	0	0	1	0	1	0	0	0	0	2	0.00045861	Small (1 < X <= 5)
clonotype 147	TRAV29/DV5.TRAJ44.TRAC	TRBV12-4.NA.TRBJ2-7.TRBC2	CAASRTGTASKLTF	CASSSRTGWGLAGFPYEQYF	TGTGCAGCAAGCCGGACCGGCACTGCCAGTAAACTCACCTTT	TGTGCCAGCAGTTCAAGGACAGGGTGGGGACTAGCGGGGTTCCCCTACGAGCAGTACTTC	0	0	0	1	0	1	0	0	0	0	2	0.00045861	Small (1 < X <= 5)
clonotype 148	TRAV29/DV5.TRAJ47.TRAC	TRBV19.TRBD1.TRBJ2-2.TRBC2	CAATIPYGNKLVF	CASIQDRAAGELFF	TGTGCAGCAACCATTCCTTATGGAAACAAGCTGGTCTTT	TGTGCCAGTATCCAGGACAGGGCGGCCGGGGAGCTGTTTTTT	0	0	0	0	1	1	0	0	0	0	2	0.00045861	Small (1 < X <= 5)
clonotype 149	TRAV29/DV5.TRAJ48.TRAC	TRBV24-1.NA.TRBJ1-5.TRBC1	CAALSNFGNEKLTF	CATSEDSNQPQHF	TGTGCAGCCTTATCTAACTTTGGAAATGAGAAATTAACCTTT	TGTGCCACCAGTGAGGATAGCAATCAGCCCCAGCATTTT	0	0	0	0	0	0	2	0	0	0	2	0.00045861	Small (1 < X <= 5)
clonotype 150	TRAV29/DV5.TRAJ53.TRAC	TRBV6-2.NA.TRBJ2-1.TRBC2	CAASAPRGGSNYKLTF	CASSAYNEQFF	TGTGCAGCAAGCGCGCCCCGTGGAGGTAGCAACTATAAACTGACATTT	TGTGCCAGCAGCGCCTACAATGAGCAGTTCTTC	0	0	0	0	0	0	1	1	0	0	2	0.00045861	Small (1 < X <= 5)
clonotype 151	TRAV29/DV5.TRAJ53.TRAC	TRBV5-6.NA.TRBJ1-2.TRBC1	CAALNSGGSNYKLTF	CASSLLGQDYGYTF	TGTGCAGCCCTGAATAGTGGAGGTAGCAACTATAAACTGACATTT	TGTGCCAGCAGCTTGTTGGGGCAGGACTATGGCTACACCTTC	0	0	0	0	0	0	0	2	0	0	2	0.00045861	Small (1 < X <= 5)
clonotype 153	TRAV3.TRAJ23.TRAC	TRBV20-1.TRBD2.TRBJ2-3.TRBC2	CAVRGYNQGGKLIF	CSARVWSGLAGGPSTDTQYF	TGTGCTGTGAGGGGGTATAACCAGGGAGGAAAGCTTATCTTC	TGCAGTGCTAGAGTTTGGTCGGGACTAGCGGGAGGGCCGAGCACAGATACGCAGTATTTT	0	0	0	0	0	0	0	2	0	0	2	0.00045861	Small (1 < X <= 5)
clonotype 154	TRAV3.TRAJ38.TRAC	TRBV4-1.NA.TRBJ2-1.TRBC2	CAVRDPYNAGNNRKLIW	CASSQEGLAGTQGEQFF	TGTGCTGTGAGAGACCCCTATAATGCTGGCAACAACCGTAAGCTGATTTGG	TGCGCCAGCAGCCAAGAAGGTCTAGCGGGAACTCAAGGTGAGCAGTTCTTC	0	0	0	0	0	0	0	0	2	0	2	0.00045861	Small (1 < X <= 5)
clonotype 159	TRAV36/DV7.TRAJ21.TRAC	TRBV19.TRBD1.TRBJ2-1.TRBC2	CAVETYNFNKFYF	CASSRGQGVNEQFF	TGTGCTGTGGAGACTTACAACTTCAACAAATTTTACTTT	TGTGCCAGTAGTAGGGGACAGGGGGTCAATGAGCAGTTCTTC	0	0	0	0	0	0	0	2	0	0	2	0.00045861	Small (1 < X <= 5)
clonotype 160	TRAV36/DV7.TRAJ49.TRAC	TRBV5-1.NA.TRBJ2-7.TRBC2	CAVEGGNQFYF	CASSRTSYEQYF	TGTGCTGTGGAGGGCGGTAACCAGTTCTATTTT	TGCGCCAGCTCGCGGACTAGCTACGAGCAGTACTTC	0	0	0	0	0	0	0	2	0	0	2	0.00045861	Small (1 < X <= 5)
clonotype 161	TRAV36/DV7.TRAJ52.TRAC	TRBV4-2.NA.TRBJ2-5.TRBC2	CAVENAGGTSYGKLTF	CASSQDLAVQETQYF	TGTGCTGTTGAAAATGCTGGTGGTACTAGCTATGGAAAGCTGACATTT	TGTGCCAGCAGCCAAGATCTAGCGGTCCAAGAGACCCAGTACTTC	0	0	0	0	0	1	1	0	0	0	2	0.00045861	Small (1 < X <= 5)
clonotype 164	TRAV38-1.TRAJ56.TRAC	TRBV5-5.TRBD1.TRBJ2-7.TRBC2	CAFMKHGTTGANSKLTF	CASSLADGGLYEQYF	TGTGCTTTCATGAAGCATGGTACGACTGGAGCCAATAGTAAGCTGACATTT	TGTGCCAGCAGCTTGGCCGACGGGGGGCTCTACGAGCAGTACTTC	0	0	2	0	0	0	0	0	0	0	2	0.00045861	Small (1 < X <= 5)
clonotype 165	TRAV38-1.TRAJ57.TRAC	TRBV28.NA.TRBJ2-5.TRBC2	CALQLQGGSEKLVF	CASSKEGGTLRETQYF	TGTGCTTTGCAACTTCAGGGCGGATCTGAAAAGCTGGTCTTT	TGTGCCAGCAGCAAGGAGGGGGGGACCTTAAGGGAGACCCAGTACTTC	0	2	0	0	0	0	0	0	0	0	2	0.00045861	Small (1 < X <= 5)
clonotype 166	TRAV38-2/DV8.TRAJ23.TRAC	TRBV5-6.NA.TRBJ2-2.TRBC2	CAYRSASGSWGGKLIF	CASSLRGWTSGNTGELFF	TGTGCTTATAGGAGCGCGAGCGGATCTTGGGGAGGAAAGCTTATCTTC	TGTGCCAGCAGCTTGAGAGGGTGGACTAGCGGGAACACCGGGGAGCTGTTTTTT	0	0	0	0	0	0	0	0	2	0	2	0.00045861	Small (1 < X <= 5)
clonotype 167	TRAV38-2/DV8.TRAJ32.TRAC	TRBV3-1.NA.TRBJ1-2.TRBC1	CAYSKTYGGATNKLIF	CASSLSKLWGGYTF	TGTGCTTATAGCAAAACTTATGGTGGTGCTACAAACAAGCTCATCTTT	TGTGCCAGCAGCCTTTCGAAACTATGGGGAGGCTACACCTTC	0	0	0	0	0	0	0	2	0	0	2	0.00045861	Small (1 < X <= 5)
clonotype 168	TRAV38-2/DV8.TRAJ44.TRAC	TRBV20-1.NA.TRBJ1-1.TRBC1;TRBV24-1.NA.TRBJ1-5.TRBC1	CAYRTFTGTASKLTF	CSARDPGRSGTEAFF;CATSDLRPGCGNQPQHF	TGTGCTTATAGGACCTTTACCGGCACTGCCAGTAAACTCACCTTT	TGCAGTGCTAGAGATCCCGGCCGGTCGGGGACTGAAGCTTTCTTT;TGTGCCACCAGTGATTTGCGCCCGGGGTGTGGCAATCAGCCCCAGCATTTT	0	0	1	0	0	1	0	0	0	0	2	0.00045861	Small (1 < X <= 5)
clonotype 169	TRAV38-2/DV8.TRAJ47.TRAC	TRBV28.NA.TRBJ2-3.TRBC2	CAYRRGEEYGNKLVF	CASSPSARTDTQYF	TGTGCTTATAGGAGAGGGGAGGAATATGGAAACAAGCTGGTCTTT	TGTGCCAGCAGTCCTTCCGCCCGCACAGATACGCAGTATTTT	0	0	0	0	1	1	0	0	0	0	2	0.00045861	Small (1 < X <= 5)
clonotype 170	TRAV39.TRAJ22.TRAC	TRBV28.NA.TRBJ2-1.TRBC2	CAGRGLSGSARQLTF	CASSLMGLAGKLAQFF	TGTGCCGGGAGGGGCCTTTCTGGTTCTGCAAGGCAACTGACCTTT	TGTGCCAGCAGTTTAATGGGACTAGCGGGTAAACTTGCGCAGTTCTTC	0	0	0	0	0	0	0	2	0	0	2	0.00045861	Small (1 < X <= 5)
clonotype 171	TRAV39.TRAJ32.TRAC	TRBV7-8.NA.TRBJ2-2.TRBC2	CAVVPNYGGATNKLIF	CASSLMNGGVGKLFF	TGTGCCGTGGTCCCTAATTATGGTGGTGCTACAAACAAGCTCATCTTT	TGTGCCAGCAGCTTAATGAACGGTGGGGTGGGAAAGCTGTTTTTT	0	0	0	0	0	0	0	2	0	0	2	0.00045861	Small (1 < X <= 5)
clonotype 172	TRAV39.TRAJ33.TRAC	TRBV19.NA.TRBJ1-2.TRBC1	CAVDITMDSNYQLIW	CASSQTVSSGYTF	TGTGCCGTGGACATTACCATGGATAGCAACTATCAGTTAATCTGG	TGTGCCAGTAGCCAGACAGTGTCCTCGGGCTACACCTTC	0	0	0	0	0	0	0	2	0	0	2	0.00045861	Small (1 < X <= 5)
clonotype 173	TRAV39.TRAJ45.TRAC	TRBV5-6.NA.TRBJ1-3.TRBC1	CAVDGPGGGADGLTF	CASTTFSGNTIYF	TGTGCCGTGGACGGACCGGGAGGAGGTGCTGACGGACTCACCTTT	TGTGCCAGCACAACTTTCTCTGGAAACACCATATATTTT	0	0	0	0	1	0	1	0	0	0	2	0.00045861	Small (1 < X <= 5)
clonotype 174	TRAV39.TRAJ57.TRAC	TRBV5-4.TRBD1.TRBJ2-5.TRBC2	CAGGVQGGSEKLVF	CASSWDREALETQYF	TGTGCCGGAGGGGTTCAGGGCGGATCTGAAAAGCTGGTCTTT	TGTGCCAGCAGCTGGGACAGGGAAGCACTGGAGACCCAGTACTTC	0	0	0	0	0	0	0	2	0	0	2	0.00045861	Small (1 < X <= 5)
clonotype 176	TRAV4.TRAJ15.TRAC;TRAV8-4.TRAJ39.TRAC	TRBV11-1.NA.TRBJ1-1.TRBC1	CLVSRQQQAGTALIF;CAVKGDNAGNMLTF	CASSLEVMNTEAFF	TGCCTCGTGTCCCGGCAGCAGCAGGCAGGAACTGCTCTGATCTTT;TGTGCTGTCAAAGGGGATAATGCAGGCAACATGCTCACCTTT	TGTGCCAGCAGCTTAGAAGTCATGAACACTGAAGCTTTCTTT	0	0	0	0	1	0	1	0	0	0	2	0.00045861	Small (1 < X <= 5)
clonotype 178	TRAV4.TRAJ3.TRAC	TRBV20-1.NA.TRBJ2-3.TRBC2	CLVVTPSSASKIIF	CSARAGADTQYF	TGCCTCGTGGTGACGCCCAGCAGTGCTTCCAAGATAATCTTT	TGCAGTGCTAGAGCGGGAGCAGATACGCAGTATTTT	0	0	0	0	0	0	1	1	0	0	2	0.00045861	Small (1 < X <= 5)
clonotype 180	TRAV4.TRAJ9.TRAC;TRAV12-3.TRAJ6.TRAC	TRBV28.NA.TRBJ2-7.TRBC2	CLVGDDGGGFKTIF;CAMLGGSYIPTF	CASSLGLAREQYF	TGCCTCGTGGGTGACGATGGTGGAGGCTTCAAAACTATCTTT;TGTGCAATGTTGGGAGGAAGCTACATACCTACATTT	TGTGCCAGCAGTTTAGGCCTAGCGCGCGAGCAGTACTTC	0	0	0	2	0	0	0	0	0	0	2	0.00045861	Small (1 < X <= 5)
clonotype 184	TRAV5.TRAJ40.TRAC	TRBV20-1.NA.TRBJ1-5.TRBC1	CAENTSGTYKYIF	CSAREWVPGIGNQPQHF	TGTGCAGAGAATACCTCAGGAACCTACAAATACATCTTT	TGCAGTGCTAGAGAGTGGGTCCCCGGGATAGGGAATCAGCCCCAGCATTTT	0	0	0	0	0	0	1	1	0	0	2	0.00045861	Small (1 < X <= 5)
clonotype 185	TRAV5.TRAJ44.TRAC	TRBV28.TRBD1.TRBJ1-2.TRBC1	CAEFTGTASKLTF	CASRTGGGNYGYTF	TGTGCAGAGTTTACCGGCACTGCCAGTAAACTCACCTTT	TGTGCCAGCAGAACAGGGGGGGGTAACTATGGCTACACCTTC	0	0	0	0	0	0	0	0	0	2	2	0.00045861	Small (1 < X <= 5)
clonotype 186	TRAV5.TRAJ9.TRAC	TRBV6-1.NA.TRBJ2-2.TRBC2	CAESIESFKTIF	CASIIPGLALRGELFF	TGTGCAGAGAGTATAGAAAGCTTCAAAACTATCTTT	TGTGCCAGCATCATACCCGGACTAGCTCTGCGCGGGGAGCTGTTTTTT	0	0	2	0	0	0	0	0	0	0	2	0.00045861	Small (1 < X <= 5)
clonotype 188	TRAV8-1.TRAJ10.TRAC	TRBV5-6.NA.TRBJ2-2.TRBC2	CAVSSWGGGNKLTF	CASSPQGPDTGELFF	TGTGCCGTGAGTTCGTGGGGAGGAGGAAACAAACTCACCTTT	TGTGCCTCTAGCCCCCAGGGCCCGGACACCGGGGAGCTGTTTTTT	1	0	1	0	0	0	0	0	0	0	2	0.00045861	Small (1 < X <= 5)
clonotype 190	TRAV8-1.TRAJ26.TRAC	TRBV28.NA.TRBJ1-2.TRBC1	CAVNAIRGQNFVF	CASSLSAGDSYGYTF	TGTGCCGTGAATGCTATACGTGGTCAGAATTTTGTCTTT	TGTGCCAGCAGTTTATCGGCAGGGGATAGCTATGGCTACACCTTC	0	0	0	0	0	1	0	0	1	0	2	0.00045861	Small (1 < X <= 5)
clonotype 191	TRAV8-1.TRAJ39.TRAC	TRBV5-8.NA.TRBJ1-3.TRBC1	CAVISNNAGNMLTF	CASSFGTIGNTIYF	TGTGCCGTGATCTCCAATAATGCAGGCAACATGCTCACCTTT	TGTGCCAGCAGCTTCGGGACTATTGGAAACACCATATATTTT	0	0	0	2	0	0	0	0	0	0	2	0.00045861	Small (1 < X <= 5)
clonotype 192	TRAV8-3.TRAJ24.TRAC	TRBV5-6.NA.TRBJ1-6.TRBC1	CAVRTTDSWGKFQF	CASSSRTQAGNSPLHF	TGTGCTGTCCGGACAACTGACAGCTGGGGGAAATTCCAGTTT	TGTGCCAGCAGCTCTAGGACACAAGCTGGTAATTCACCCCTCCACTTT	0	0	0	0	0	0	0	0	2	0	2	0.00045861	Small (1 < X <= 5)
clonotype 193	TRAV8-3.TRAJ24.TRAC	TRBV5-4.NA.TRBJ2-1.TRBC2	CAVGLTTDSWGKLQF	CASRRHTSSYNEQFF	TGTGCTGTGGGTTTGACAACTGACAGCTGGGGGAAATTGCAGTTT	TGTGCCAGCAGACGTCATACGAGCTCCTACAATGAGCAGTTCTTC	0	0	0	0	0	1	0	1	0	0	2	0.00045861	Small (1 < X <= 5)
clonotype 194	TRAV8-3.TRAJ34.TRAC	TRBV20-1.NA.TRBJ2-5.TRBC2	CAVGAQSYNTDKLIF	CSARQTQETQYF	TGTGCTGTGGGTGCGCAATCTTATAACACCGACAAGCTCATCTTT	TGCAGTGCTAGACAGACTCAAGAGACCCAGTACTTC	0	0	0	0	0	0	0	0	2	0	2	0.00045861	Small (1 < X <= 5)
clonotype 195	TRAV8-3.TRAJ43.TRAC	TRBV6-5.NA.TRBJ2-7.TRBC2	CAVGGNNDMRF	CASRPSGSISYEQYF	TGTGCTGTGGGGGGGAACAATGACATGCGCTTT	TGTGCCAGCAGACCCAGCGGGAGTATTTCCTACGAGCAGTACTTC	0	0	0	0	1	0	1	0	0	0	2	0.00045861	Small (1 < X <= 5)
clonotype 196	TRAV8-3.TRAJ9.TRAC	TRBV5-4.TRBD2.TRBJ2-3.TRBC2	CAVVNTGGFKTIF	CASSLRLAGGTTDTQYF	TGTGCTGTGGTTAATACTGGAGGCTTCAAAACTATCTTT	TGTGCCAGCAGCTTGAGACTAGCGGGAGGCACAACAGATACGCAGTATTTT	0	0	0	1	0	0	0	0	0	1	2	0.00045861	Small (1 < X <= 5)
clonotype 197	TRAV8-4.TRAJ21.TRAC;TRAV20.TRAJ21.TRAC	TRBV5-1.TRBD1.TRBJ1-1.TRBC1	CAVSAKGYNFNKFYF;CAVLNKFYF	CASSLEGEGGTEAFF	TGTGCTGTGAGTGCCAAGGGATACAACTTCAACAAATTTTACTTT;TGTGCTGTGCTCAACAAATTTTACTTT	TGCGCCAGCAGCTTGGAAGGGGAAGGCGGCACTGAAGCTTTCTTT	0	0	0	0	0	0	0	2	0	0	2	0.00045861	Small (1 < X <= 5)
clonotype 198	TRAV8-4.TRAJ3.TRAC	TRBV12-4.NA.TRBJ2-7.TRBC2	CAVTTYSSASKIIF	CASSPSQDRTYEQYF	TGTGCTGTGACCACTTACAGCAGTGCTTCCAAGATAATCTTT	TGTGCCAGCAGTCCTTCCCAAGACAGGACCTACGAGCAGTACTTC	0	0	0	1	0	1	0	0	0	0	2	0.00045861	Small (1 < X <= 5)
clonotype 200	TRAV8-4.TRAJ37.TRAC	TRBV27.NA.TRBJ2-1.TRBC2	CAVSDPGSSNTGKLIF	CASSLITLAGGSYNEQFF	TGTGCTGTGAGTGACCCAGGCTCTAGCAACACAGGCAAACTAATCTTT	TGTGCCAGCAGTTTAATCACCCTAGCGGGAGGCTCCTACAATGAGCAGTTCTTC	0	0	0	0	1	1	0	0	0	0	2	0.00045861	Small (1 < X <= 5)
clonotype 202	TRAV8-4.TRAJ47.TRAC	TRBV28.NA.TRBJ1-2.TRBC1	CAVSESEYGNKLVF	CASSPQGAHGYTF	TGTGCTGTGAGTGAGTCGGAATATGGAAACAAGCTGGTCTTT	TGTGCCAGCAGTCCTCAGGGGGCGCATGGCTACACCTTC	0	0	0	0	0	2	0	0	0	0	2	0.00045861	Small (1 < X <= 5)
clonotype 203	TRAV8-4.TRAJ49.TRAC	TRBV20-1.NA.TRBJ2-7.TRBC2	CAVSSNTGNQFYF	CSAFNRGGTFSYEQYF	TGTGCTGTGAGCTCGAACACCGGTAACCAGTTCTATTTT	TGCAGTGCTTTCAACAGGGGAGGGACCTTCTCCTACGAGCAGTACTTC	0	0	0	0	0	0	0	2	0	0	2	0.00045861	Small (1 < X <= 5)
clonotype 205	TRAV8-4.TRAJ9.TRAC	TRBV24-1.NA.TRBJ2-1.TRBC2	CAVHPNTGGFKTIF	CATSVGLAGRGEQFF	TGTGCTGTCCACCCCAATACTGGAGGCTTCAAAACTATCTTT	TGTGCCACCAGTGTTGGGCTAGCGGGGCGGGGTGAGCAGTTCTTC	0	0	0	0	0	1	0	0	1	0	2	0.00045861	Small (1 < X <= 5)
clonotype 207	TRAV8-6.TRAJ33.TRAC	TRBV30.TRBD1.TRBJ1-6.TRBC1	CAVSDESNYQLIW	CAWRGQGIGNSPLHF	TGTGCTGTGAGTGATGAAAGCAACTATCAGTTAATCTGG	TGTGCCTGGAGGGGACAGGGAATCGGTAATTCACCCCTCCACTTT	0	0	1	0	0	1	0	0	0	0	2	0.00045861	Small (1 < X <= 5)
clonotype 208	TRAV8-6.TRAJ52.TRAC	TRBV19.NA.TRBJ1-3.TRBC1	CAVSDLSGGTSYGKLTF	CASSIAVPGNTIYF	TGTGCTGTGAGTGATCTATCGGGTGGTACTAGCTATGGAAAGCTGACATTT	TGTGCCAGTAGTATTGCCGTACCCGGAAACACCATATATTTT	0	0	0	0	0	0	0	2	0	0	2	0.00045861	Small (1 < X <= 5)
clonotype 209	TRAV8-6.TRAJ53.TRAC	TRBV30.TRBD1.TRBJ1-6.TRBC1	CAVSEGSNYKLTF	CAWTGQGNSPLHF	TGTGCTGTGAGTGAGGGTAGCAACTATAAACTGACATTT	TGTGCCTGGACCGGACAGGGGAACTCACCCCTCCACTTT	0	0	0	1	0	1	0	0	0	0	2	0.00045861	Small (1 < X <= 5)
clonotype 210	TRAV8-6.TRAJ53.TRAC	TRBV30.NA.TRBJ1-5.TRBC1	CAVSGGSNYKLTF	CAWSGQGNQPQHF	TGTGCTGTGAGTGGAGGTAGCAACTATAAACTGACATTT	TGTGCCTGGAGTGGTCAAGGCAATCAGCCCCAGCATTTT	0	0	1	0	0	1	0	0	0	0	2	0.00045861	Small (1 < X <= 5)
clonotype 211	TRAV8-6.TRAJ53.TRAC	TRBV6-5.NA.TRBJ1-2.TRBC1	CAVIIISGGSNYKLTF	CASSYSGGGIYGYTF	TGTGCTGTGATTATAATTAGTGGAGGTAGCAACTATAAACTGACATTT	TGTGCCAGCAGTTACTCAGGAGGAGGGATCTATGGCTACACCTTC	0	0	0	1	0	1	0	0	0	0	2	0.00045861	Small (1 < X <= 5)
clonotype 215	TRAV9-2.TRAJ28.TRAC	TRBV27.TRBD2.TRBJ2-7.TRBC2	CALSPSGAGSYQLTF	CASSILLGTSGSYEQYF	TGTGCTCTGAGTCCTTCTGGGGCTGGGAGTTACCAACTCACTTTC	TGTGCCAGCAGTATACTCCTGGGGACTAGCGGGAGCTACGAGCAGTACTTC	0	0	1	0	0	0	0	0	1	0	2	0.00045861	Small (1 < X <= 5)
clonotype 216	TRAV9-2.TRAJ28.TRAC	TRBV5-1.NA.TRBJ2-3.TRBC2	CALSEKLAYSGAGSYQLTF	CASSLRAGGGTDTQYF	TGTGCTCTGAGTGAAAAACTTGCATACTCTGGGGCTGGGAGTTACCAACTCACTTTC	TGCGCCAGCAGCTTGCGGGCGGGAGGGGGCACAGATACGCAGTATTTT	0	0	0	0	0	2	0	0	0	0	2	0.00045861	Small (1 < X <= 5)
clonotype 217	TRAV9-2.TRAJ29.TRAC	TRBV7-2.NA.TRBJ1-2.TRBC1	CALTSGNTPLVF	CASSLKTPGHGYGYTF	TGTGCTCTCACTTCAGGAAACACACCTCTTGTCTTT	TGTGCCAGCAGCTTAAAAACACCGGGACATGGTTATGGCTACACCTTC	0	0	1	0	0	1	0	0	0	0	2	0.00045861	Small (1 < X <= 5)
clonotype 218	TRAV9-2.TRAJ33.TRAC	TRBV7-2.TRBD1.TRBJ2-1.TRBC2	CALRHSNYQLIW	CASSLVWTGRDNEQFF	TGTGCTCTGAGACACAGCAACTATCAGTTAATCTGG	TGTGCCAGCAGCTTAGTTTGGACAGGGAGAGACAATGAGCAGTTCTTC	0	0	0	0	0	0	0	2	0	0	2	0.00045861	Small (1 < X <= 5)
clonotype 219	TRAV9-2.TRAJ33.TRAC	TRBV9.TRBD1.TRBJ2-2.TRBC2	CALSGSNYQLIW	CASSPRTGNTGELFF	TGTGCTCTGAGTGGGAGCAACTATCAGTTAATCTGG	TGTGCCAGCAGCCCACGGACAGGGAACACCGGGGAGCTGTTTTTT	0	0	0	2	0	0	0	0	0	0	2	0.00045861	Small (1 < X <= 5)
clonotype 220	TRAV9-2.TRAJ37.TRAC	TRBV20-1.NA.TRBJ2-3.TRBC2;TRBV20-1.NA.TRBJ2-3.TRBC2	CALSDYASNTGKLIF	CSARVSSDTQYF;CSASGLAGSRGTQYF	TGTGCTCTGAGTGATTACGCTAGCAACACAGGCAAACTAATCTTT	TGCAGTGCTAGAGTGAGTTCAGATACGCAGTATTTT;TGCAGTGCTAGCGGGCTAGCGGGGTCCCGGGGAACGCAGTATTTT	0	0	0	0	0	2	0	0	0	0	2	0.00045861	Small (1 < X <= 5)
clonotype 221	TRAV9-2.TRAJ37.TRAC	TRBV20-1.NA.TRBJ2-3.TRBC2	CALSDYASNTGKLIF	CSASGLAGSRGTQYF	TGTGCTCTGAGTGATTACGCTAGCAACACAGGCAAACTAATCTTT	TGCAGTGCTAGCGGGCTAGCGGGGTCCCGGGGAACGCAGTATTTT	0	0	1	1	0	0	0	0	0	0	2	0.00045861	Small (1 < X <= 5)
clonotype 222	TRAV9-2.TRAJ47.TRAC	TRBV7-2.NA.TRBJ1-2.TRBC1	CARGDGNKLVF	CASSLSRDSRGYTF	TGTGCCCGAGGGGATGGAAACAAACTGGTCTTT	TGTGCCAGCAGCTTAAGTCGGGACTCACGCGGCTACACCTTC	0	0	0	0	0	0	0	2	0	0	2	0.00045861	Small (1 < X <= 5)
clonotype 225	TRAV9-2.TRAJ52.TRAC;TRAV3.TRAJ47.TRAC	TRBV3-1.NA.TRBJ2-7.TRBC2	CALSAGGTSYGKLTF;CAVRDMEYGNKLVF	CASSHLTTAYEQYF	TGTGCTCTGTCTGCTGGTGGTACTAGCTATGGAAAGCTGACATTT;TGTGCTGTGAGAGACATGGAATATGGAAACAAGCTGGTCTTT	TGTGCCAGCAGCCACCTTACGACTGCCTACGAGCAGTACTTC	0	0	0	0	1	0	0	0	1	0	2	0.00045861	Small (1 < X <= 5)
clonotype 229	TRAV9-2.TRAJ8.TRAC	TRBV2.NA.TRBJ2-3.TRBC2	CALLNTGFQKLVF	CASRGEYPDTQYF	TGTGCTCTGTTGAACACAGGCTTTCAGAAACTTGTATTT	TGTGCCAGCCGGGGGGAGTACCCAGATACGCAGTATTTT	0	0	0	0	0	0	0	2	0	0	2	0.00045861	Small (1 < X <= 5)
clonotype 231	TRAV9-2.TRAJ9.TRAC	TRBV29-1.NA.TRBJ2-5.TRBC2	CALRITGGFKTIF	CSLSAVAGEKETQYF	TGTGCTCTGAGGATCACTGGAGGCTTCAAAACTATCTTT	TGCAGCCTGTCGGCGGTAGCAGGGGAGAAAGAGACCCAGTACTTC	0	0	2	0	0	0	0	0	0	0	2	0.00045861	Small (1 < X <= 5)
